# Supplementary material for: Aspen Plus(r) Process Simulation Model of the Biomass Ash-Based Treatment of Anaerobic Digestate for Production of Fertilizer and Upgradation of Biogas
Source: Preprints.org preprint supplement (doi:10.20944/preprints202303.0216.v1), 2023-03-13
Supplement: Supplementary file 6 [file Case 6.xlsx]

## Sheet: Liquid Stream As Input
	Units	5	6	BIOGAS	INPUT	LIQUID	Chemical Formula	Total MR	Nitrogen MR %	Nitrogen %
Description				GAS OUTLET	FEED	Liquid Outlet
From		B3	B2	B1		B1
To		B1	B3		B2
Stream Class		CONVEN	CONVEN	CONVEN	CONVEN	CONVEN
Maximum Relative Error
Cost Flow	$/sec
MIXED Substream
Phase		Liquid Phase	Liquid Phase	Vapor Phase	Liquid Phase	Liquid Phase
Temperature	K	328.15	296.203	328.15	296.15	328.15
Pressure	N/sqm	102300	100000	101325	101325	101325
Molar Vapor Fraction		0	0	1	0	0
Molar Liquid Fraction		1	1	0	1	1
Molar Solid Fraction		0	0	0	0	0
Mass Vapor Fraction		0	0	1	0	0
Mass Liquid Fraction		1	1	0	1	1
Mass Solid Fraction		0	0	0	0	0
Molar Enthalpy	J/kmol	-2.85634e+08	-2.88133e+08	-1.94112e+08	-2.88133e+08	-2.83728e+08
Mass Enthalpy	J/kg	-1.51276e+07	-1.525e+07	-7.8459e+06	-1.525e+07	-1.52663e+07
Molar Entropy	J/kmol-K	-157644	-166101	-38401	-166115	-156279
Mass Entropy	J/kg-K	-8349.03	-8791.22	-1552.15	-8791.97	-8408.74
Molar Density	kmol/cum	51.622	53.1749	0.0371379	53.1776	51.983
Mass Density	kg/cum	974.709	1004.69	0.918812	1004.74	966.117
Enthalpy Flow	Watt	-58.5805	-59.0543	-0.572198	-59.0543	-57.9839
Average MW		18.8817	18.894	24.7406	18.894	18.5853
Mole Flows	kmol/hr	0.000738321	0.000737839	1.0612e-05	0.000737839	0.000735713					Total Nitrogen Mole Flow	1.34661e-06	Nitrogen Mole Frac	0.00183034		Element	MR
WATER	kmol/hr	0.000728335	0.000729024	1.64032e-06	0.000729024	0.000728013	H2O	18		0			N% w/out Water	0.17489		H	1
GLYCEROL	kmol/hr	2.23532e-08	2.0305e-08	8.47338e-16	2.0305e-08	1.75628e-08	C3H8O3	92		0						O	16
OLEIC-AC	kmol/hr	1.72784e-09	1.71437e-11	3.16361e-19	1.71437e-11	4.6482e-10	C18H34O2	282		0						C	12
DEXTROSE	kmol/hr	1.47363e-06	1.30219e-06	7.30556e-20	1.30219e-06	2.8367e-07	C6H12O6	180		0						N	14
ACETI-AC	kmol/hr	3.15498e-06	1.41079e-06	2.4357e-09	1.41079e-06	8.0048e-07	C2H4O2-1	60		0						S	32
PROPI-01	kmol/hr	2.44894e-08	2.44894e-08	1.56312e-09	2.44894e-08	6.18947e-07	C3H6O2-1	74		0
ISOBU-01	kmol/hr	2.02738e-08	2.02738e-08	1.46238e-10	2.02738e-08	2.59094e-07	C4H8O2-4	88		0
ISOVA-01	kmol/hr	0	2.99234e-12	1.31955e-15	2.99234e-12	3.76341e-13	C5H10O2-D3	102		0
H+	kmol/hr	0	0	0	0	0	H+	1		0
OH-	kmol/hr	0	0	0	0	0	OH-	17		0
NH3	kmol/hr	3.02572e-08	5.06399e-12	5.7335e-16	5.06399e-12	1.3116e-14	NH3	17		0
NH4+	kmol/hr	0	0	0	0	0	NH4+	18		0
CO2	kmol/hr	1.61558e-06	1.69929e-06	3.14225e-06	1.69929e-06	1.6894e-06	CO2	14		0
C5H7NO2	kmol/hr	2.88685e-08	2.88685e-08	5.90334e-12	2.88685e-08	2.58273e-07	C5H7NO2	113	0.123894	3.19984e-08
ARGININE	kmol/hr	3.86557e-09	3.86122e-09	2.06377e-17	3.86122e-09	4.3723e-09	C6H14N4O2-N2	174	0.321839	1.40718e-09
HISTIDIN	kmol/hr	0	1.66524e-19	1.28554e-18	1.66524e-19	2.72353e-10	C6H9N3O2	155	0.270968	7.37989e-11
LYSINE	kmol/hr	0	0	7.19226e-19	0	1.52709e-10	C6H14N2O2	146	0.191781	2.92867e-11
TYROSINE	kmol/hr	0	5.15255e-13	5.92226e-92	5.15255e-13	3.22588e-11	C9H11NO3	181	0.0773481	2.49515e-12
TRYPTOPH	kmol/hr	0	9.15633e-13	5.92247e-92	9.15633e-13	3.22599e-11	C11H12N2O2	204	0.137255	4.42783e-12
PHENYLAL	kmol/hr	7.73916e-10	7.70441e-10	1.09159e-17	7.70441e-10	8.7387e-10	C9H11NO2	165	0.0848485	7.41466e-11
CYSTEINE	kmol/hr	4.15285e-09	4.14639e-09	5.2528e-19	4.14639e-09	4.48788e-09	C3H7NO2S	121	0.115702	5.19258e-10
METHIONI	kmol/hr	0	0	1.67199e-91	0	9.10741e-11	C5H11NO2S	149	0.0939597	8.5573e-12
THREONIN	kmol/hr	4.69085e-12	1.5464e-13	2.82168e-91	1.5464e-13	1.53698e-10	C4H9NO3	119	0.117647	1.80821e-11
SERINE	kmol/hr	1.42249e-08	1.42083e-08	2.62816e-89	1.42083e-08	1.43157e-08	C3H7NO3	105	0.133333	1.90876e-09
LEUCINE	kmol/hr	3.15577e-09	3.14901e-09	5.96008e-90	3.14901e-09	3.24648e-09	C6H13NO2	131	0.10687	3.46952e-10
ISOLEUCI	kmol/hr	5.47006e-10	5.42567e-10	1.17096e-90	5.42567e-10	6.37826e-10	C6H13NO2-I	131	0.10687	6.81646e-11
VALINE	kmol/hr	3.5213e-09	3.51415e-09	6.62757e-90	3.51415e-09	3.61006e-09	C5H11NO2	117	0.119658	4.31973e-10
GLUTAMIC	kmol/hr	1.02247e-11	3.08257e-12	1.18712e-18	3.08257e-12	1.56382e-10	C5H9NO4	147	0.0952381	1.48935e-11
ASPARTIC	kmol/hr	7.00795e-10	6.96162e-10	1.45497e-90	6.96162e-10	7.92526e-10	C4H7NO4	133	0.105263	8.34238e-11
GLYCINE	kmol/hr	1.81309e-08	1.81068e-08	2.13747e-18	1.81068e-08	1.82666e-08	C2H5NO2-D1	75	0.186667	3.40976e-09
ALANINE	kmol/hr	5.91911e-10	5.87375e-10	1.25409e-90	5.87375e-10	6.8311e-10	C3H7NO2	89	0.629213	4.29822e-10
PROLINE	kmol/hr	7.5742e-09	7.56348e-09	8.95607e-19	7.56348e-09	7.65187e-09	C5H9NO2-N8	115	0.121739	9.31531e-10
HYDROGEN	kmol/hr	2.54059e-10	2.54059e-10	3.13636e-08	2.54059e-10	1.77633e-10	H2	2		0
METHANE	kmol/hr	6.72001e-07	1.40049e-11	5.75865e-06	1.40049e-11	8.5228e-07	CH4	16		0
INDOLE	kmol/hr	0	4.89589e-13	8.44129e-17	4.89589e-13	2.97976e-11	C8H7N	117	0.837607	2.49586e-11
FROMAMID	kmol/hr	7.34301e-08	7.34301e-08	7.69642e-13	7.34301e-08	7.34399e-08	CH3NO	45	0.311111	2.2848e-08
H2S	kmol/hr	1.01069e-08	2.28068e-11	3.34035e-09	2.28068e-11	9.33103e-09	H2S	34		0
CH4S	kmol/hr	1.60121e-11	1.60121e-11	3.23713e-11	1.60121e-11	5.21124e-10	CH4S	48		0
BENZENE	kmol/hr	5.431e-10	5.431e-10	1.04421e-08	5.431e-10	1.17172e-09	C6H6	78		0
PHENOL	kmol/hr	0	0	2.98896e-21	0	5.3514e-19	C6H6O	94		0
H2CO3	kmol/hr	0	0	0	0	0	H2CO3	62		0
HCO3-	kmol/hr	0	0	0	0	0	HCO3-	61		0
CO3-2	kmol/hr	0	0	0	0	0	CO3-2	60		0
HS-	kmol/hr	0	0	0	0	0	HS-	33		0
CELLULOS	kmol/hr	1.71445e-07	5.71485e-07	3.1475e-88	5.71485e-07	1.71445e-07	C6H10O5	162		0
HEMECELL	kmol/hr	1.70018e-07	4.25045e-07	5.6932e-16	4.25045e-07	1.70018e-07	C5H8O4	132		0
GLUCOSE	kmol/hr	0	0	0	0	0	C6H12O6	180		0
TRIOLEIN	kmol/hr	6.33592e-11	6.33592e-10	6.68447e-29	6.33592e-10	6.33592e-11	C57H104O6	884		0
TRIPALM	kmol/hr	6.95607e-11	6.95607e-10	6.80673e-28	6.95607e-10	6.95607e-11	C51H98O6	806		0
PALM	kmol/hr	2.7574e-09	2.73496e-11	1.73972e-20	2.73496e-11	1.3787e-12	C16H34O	242		0
SN-1--01	kmol/hr	0	0	0	0	0	C37H70O5-1	594		0
SN-1--02	kmol/hr	9.46572e-11	9.46572e-10	8.99312e-25	9.46572e-10	9.46572e-11	C37H68O5-1	592		0
XYLOSE	kmol/hr	1.38125e-07	1.06245e-07	1.92831e-17	1.06245e-07	1.38125e-07	C5H10O5	150		0
FURFURAL	kmol/hr	1.06245e-08	0	1.69629e-10	0	1.04549e-08	C5H4O2	96		0
LINOLEIC	kmol/hr	8.60424e-10	8.50888e-12	3.7123e-22	8.50888e-12	4.30212e-13	C18H32O2	280		0
STARCH	kmol/hr	0	0	0	0	0	C6H10O5	162		0
ETHANOL	kmol/hr	7.60408e-07	1.5161e-06	2.10179e-08	1.5161e-06	7.3939e-07	C2H6O-2	62		0
PROTEIN	kmol/hr	1.12045e-09	1.12045e-08	1.50832e-10	1.12045e-08	9.69618e-10	C13H25O7N3S	367	0.114441	1.10964e-10
KERATIN	kmol/hr	9.65151e-11	1.9303e-10	9.64932e-11	1.9303e-10	2.18781e-14	C4.39H8NO2.1	102	0.137255	3.00287e-15
ACETATE	kmol/hr	0	0	0	0	0	CH3COO-	59		0
INERT	kmol/hr	1.54441e-06	1.54441e-06	6.01687e-20	1.54441e-06	1.54441e-06	INERT	83% N2	0.83	1.28186e-06
Mole Fractions
WATER		0.986475	0.988053	0.154572	0.988053	0.989534	H2O
GLYCEROL		3.02757e-05	2.75196e-05	7.98473e-11	2.75196e-05	2.38718e-05	C3H8O3
OLEIC-AC		2.34023e-06	2.32351e-08	2.98117e-14	2.32351e-08	6.31795e-07	C18H3402
DEXTROSE		0.00199593	0.00176487	6.88426e-15	0.00176487	0.000385572	C6H12O6
ACETI-AC		0.00427318	0.00191206	0.000229524	0.00191206	0.00108803	C2H4O2-1
PROPI-01		3.31691e-05	3.31908e-05	0.000147298	3.31908e-05	0.00084129	C3H6O2-1
ISOBU-01		2.74594e-05	2.74773e-05	1.37804e-05	2.74773e-05	0.000352167	C4H8O2-4
ISOVA-01		0	4.05554e-09	1.24345e-10	4.05554e-09	5.11533e-10	C5H10O2-D3
H+		0	0	0	0	0	H+
OH-		0	0	0	0	0	OH-
NH3		4.09811e-05	6.86327e-09	5.40286e-11	6.86327e-09	1.78276e-11	NH3
NH4+		0	0	0	0	0	NH4+
CO2		0.00218819	0.00230306	0.296104	0.00230306	0.00229628	CO2
C5H7NO2		3.91002e-05	3.91258e-05	5.5629e-07	3.91258e-05	0.000351051	C5H7NO2
ARGININE		5.23562e-06	5.23315e-06	1.94476e-12	5.23315e-06	5.94295e-06	C6H14N4O2-N2
HISTIDIN		0	2.25691e-16	1.2114e-13	2.25691e-16	3.7019e-07	C6H8N3O2-E
LYSINE		0	0	6.77749e-14	0	2.07567e-07	C6H14N2O2
TYROSINE		0	6.9833e-10	5.58073e-87	6.9833e-10	4.3847e-08	C9H11NO3
TRYPTOPH		0	1.24097e-09	5.58093e-87	1.24097e-09	4.38485e-08	C11H12N2O2
PHENYLAL		1.04821e-06	1.04419e-06	1.02864e-12	1.04419e-06	1.18779e-06	C9H11NO2
CYSTEINE		5.62473e-06	5.61964e-06	4.94988e-14	5.61964e-06	6.10004e-06	C3H6NO2S-E
METHIONI		0	0	1.57557e-86	0	1.2379e-07	C5H11NO2S
THREONIN		6.3534e-09	2.09585e-10	2.65896e-86	2.09585e-10	2.08911e-07	C4H9NO3
SERINE		1.92665e-05	1.92566e-05	2.4766e-84	1.92566e-05	1.94582e-05	C3H7NO3
LEUCINE		4.27425e-06	4.26789e-06	5.61637e-85	4.26789e-06	4.4127e-06	C6H13NO2
ISOLEUCI		7.40879e-07	7.35346e-07	1.10343e-85	7.35346e-07	8.66949e-07	C6H13NO2-I
VALINE		4.76933e-06	4.76277e-06	6.24537e-85	4.76277e-06	4.90689e-06	C5H11NO2
GLUTAMIC		1.38486e-08	4.17784e-09	1.11866e-13	4.17784e-09	2.12558e-07	C5H9NO4
ASPARTIC		9.49174e-07	9.43516e-07	1.37106e-85	9.43516e-07	1.07722e-06	C4H7NO4
GLYCINE		2.4557e-05	2.45403e-05	2.01421e-13	2.45403e-05	2.48284e-05	C2H5NO2-D1
ALANINE		8.01699e-07	7.96075e-07	1.18177e-85	7.96075e-07	9.28502e-07	C3H7NO2
PROLINE		1.02587e-05	1.02509e-05	8.43959e-14	1.02509e-05	1.04006e-05	C5H9NO2-N8
HYDROGEN		3.44104e-07	3.44329e-07	0.00295549	3.44329e-07	2.41443e-07	H2
METHANE		0.000910174	1.8981e-08	0.542655	1.8981e-08	0.00115844	CH4
INDOLE		0	6.63545e-10	7.95449e-12	6.63545e-10	4.05016e-08	C8H7N
FROMAMID		9.94555e-05	9.95205e-05	7.25258e-08	9.95205e-05	9.98215e-05	CH3NO
H2S		1.3689e-05	3.09103e-08	0.000314772	3.09103e-08	1.2683e-05	H2S
CH4S		2.16872e-08	2.17013e-08	3.05045e-06	2.17013e-08	7.08325e-07	CH4S
BENZENE		7.35588e-07	7.36069e-07	0.000983994	7.36069e-07	1.59263e-06	C6H6
PHENOL		0	0	2.81659e-16	0	7.27377e-16	C6H6O
H2CO3		0	0	0	0	0	H2CO3
HCO3-		0	0	0	0	0	HCO3-
CO3-2		0	0	0	0	0	CO3-2
HS-		0	0	0	0	0	HS-
CELLULOS		0.00023221	0.000774539	2.96599e-83	0.000774539	0.000233033	CELLULOSE
HEMECELL		0.000230277	0.000576068	5.36488e-11	0.000576068	0.000231093	C5H8O4
GLUCOSE		0	0	0	0	0	C6H12O6
TRIOLEIN		8.58152e-08	8.58713e-07	6.29899e-24	8.58713e-07	8.61194e-08	C57H104O6
TRIPALM		9.42147e-08	9.42762e-07	6.4142e-23	9.42762e-07	9.45487e-08	C51H98O6
PALM		3.73469e-06	3.70672e-08	1.6394e-15	3.70672e-08	1.87397e-09	C16H34O
SN-1--01		0	0	0	0	0	C37H70O5-1
SN-1--02		1.28206e-07	1.2829e-06	8.4745e-20	1.2829e-06	1.28661e-07	C37H68O5-1
XYLOSE		0.00018708	0.000143995	1.81711e-12	0.000143995	0.000187743	C5H10O5
FURFURAL		1.43901e-05	0	1.59847e-05	0	1.42105e-05	C5H4O2
LINOLEIC		1.16538e-06	1.15322e-08	3.49821e-17	1.15322e-08	5.84756e-10	C18H32O2
STARCH		0	0	0	0	0	CELLULOSE
ETHANOL		0.00102992	0.00205479	0.00198058	0.00205479	0.001005	C2H6O-2
PROTEIN		1.51757e-06	1.51856e-05	1.42134e-05	1.51856e-05	1.31793e-06	C13H25O7N3S
KERATIN		1.30722e-07	2.61616e-07	9.09286e-06	2.61616e-07	2.97373e-11	C4.39H8NO2.1
ACETATE		0	0	0	0	0	CH3COO-
INERT		0.00209179	0.00209316	5.66989e-15	0.00209316	0.00209921	INERT
Mass Flows	kg/day	0.334577	0.334577	0.00630111	0.334577	0.328162
WATER	kg/day	0.314908	0.315206	0.000709218	0.315206	0.314769	H2O
GLYCEROL	kg/day	4.94067e-05	4.48796e-05	1.87285e-12	4.48796e-05	3.88186e-05	C3H8O3
OLEIC-AC	kg/day	1.17131e-05	1.16218e-07	2.14463e-15	1.16218e-07	3.15103e-06	C18H3402
DEXTROSE	kg/day	0.00637168	0.00563038	3.15877e-16	0.00563038	0.00122653	C6H12O6
ACETI-AC	kg/day	0.00454715	0.00203332	3.51048e-06	0.00203332	0.0011537	C2H4O2-1
PROPI-01	kg/day	4.35399e-05	4.35399e-05	2.77908e-06	4.35399e-05	0.00110043	C3H6O2-1
ISOBU-01	kg/day	4.28701e-05	4.28701e-05	3.09227e-07	4.28701e-05	0.000547867	C4H8O2-4
ISOVA-01	kg/day	0	7.33481e-09	3.23447e-12	7.33481e-09	9.22486e-10	C5H10O2-D3
H+	kg/day	0	0	0	0	0	H+
OH-	kg/day	0	0	0	0	0	OH-
NH3	kg/day	1.23671e-05	2.06982e-09	2.34347e-13	2.06982e-09	5.36095e-12	NH3
NH4+	kg/day	0	0	0	0	0	NH4+
CO2	kg/day	0.00170644	0.00179485	0.00331895	0.00179485	0.0017844	CO2
C5H7NO2	kg/day	7.83719e-05	7.83719e-05	1.60263e-08	7.83719e-05	0.000701155	C5H7NO2
ARGININE	kg/day	1.61614e-05	1.61433e-05	8.62837e-14	1.61433e-05	1.828e-05	C6H14N4O2-N2
HISTIDIN	kg/day	0	6.16066e-16	4.75592e-15	6.16066e-16	1.00759e-06	C6H8N3O2-E
LYSINE	kg/day	0	0	2.52344e-15	0	5.35788e-07	C6H14N2O2
TYROSINE	kg/day	0	2.24063e-09	2.57535e-88	2.24063e-09	1.4028e-07	C9H11NO3
TRYPTOPH	kg/day	0	4.48796e-09	2.90289e-88	4.48796e-09	1.58122e-07	C11H12N2O2
PHENYLAL	kg/day	3.06827e-06	3.05449e-06	4.32773e-14	3.05449e-06	3.46455e-06	C9H11NO2
CYSTEINE	kg/day	1.19754e-05	1.19567e-05	1.51473e-15	1.19567e-05	1.29415e-05	C3H6NO2S-E
METHIONI	kg/day	0	0	5.98763e-88	0	3.26148e-07	C5H11NO2S
THREONIN	kg/day	1.34106e-08	4.42098e-10	8.06688e-88	4.42098e-10	4.39406e-07	C4H9NO3
SERINE	kg/day	3.58786e-05	3.58367e-05	6.62885e-86	3.58367e-05	3.61076e-05	C3H7NO3
LEUCINE	kg/day	9.93498e-06	9.91371e-06	1.87635e-86	9.91371e-06	1.02205e-05	C6H13NO2
ISOLEUCI	kg/day	1.72208e-06	1.70811e-06	3.6864e-87	1.70811e-06	2.008e-06	C6H13NO2-I
VALINE	kg/day	9.9003e-06	9.88022e-06	1.86337e-86	9.88022e-06	1.01499e-05	C5H11NO2
GLUTAMIC	kg/day	3.61048e-08	1.0885e-08	4.19189e-15	1.0885e-08	5.52206e-07	C5H9NO4
ASPARTIC	kg/day	2.23869e-06	2.22389e-06	4.64788e-87	2.22389e-06	2.53172e-06	C4H7NO4
GLYCINE	kg/day	3.26649e-05	3.26215e-05	3.8509e-15	3.26215e-05	3.29093e-05	C2H5NO2-D1
ALANINE	kg/day	1.26566e-06	1.25596e-06	2.68158e-87	1.25596e-06	1.46067e-06	C3H7NO2
PROLINE	kg/day	2.09288e-05	2.08992e-05	2.47471e-15	2.08992e-05	2.11434e-05	C5H9NO2-N8
HYDROGEN	kg/day	1.22917e-08	1.22917e-08	1.51741e-06	1.22917e-08	8.59407e-09	H2
METHANE	kg/day	0.000258738	5.39225e-09	0.00221723	5.39225e-09	0.00032815	CH4
INDOLE	kg/day	0	1.37653e-09	2.37336e-13	1.37653e-09	8.3779e-08	C8H7N
FROMAMID	kg/day	7.93767e-05	7.93767e-05	8.3197e-10	7.93767e-05	7.93873e-05	CH3NO
H2S	kg/day	8.26706e-06	1.86552e-08	2.73229e-06	1.86552e-08	7.63246e-06	H2S
CH4S	kg/day	1.84877e-08	1.84877e-08	3.73762e-08	1.84877e-08	6.01695e-07	CH4S
BENZENE	kg/day	1.01816e-06	1.01816e-06	1.95761e-05	1.01816e-06	2.19666e-06	C6H6
PHENOL	kg/day	0	0	6.75121e-18	0	1.20873e-15	C6H6O
H2CO3	kg/day	0	0	0	0	0	H2CO3
HCO3-	kg/day	0	0	0	0	0	HCO3-
CO3-2	kg/day	0	0	0	0	0	CO3-2
HS-	kg/day	0	0	0	0	0	HS-
CELLULOS	kg/day	0.000667166	0.00222389	1.22482e-84	0.00222389	0.000667166	CELLULOSE
HEMECELL	kg/day	0.000539091	0.00134773	1.80519e-12	0.00134773	0.000539091	C5H8O4
GLUCOSE	kg/day	0	0	0	0	0	C6H12O6
TRIOLEIN	kg/day	1.34639e-06	1.34639e-05	1.42046e-24	1.34639e-05	1.34639e-06	C57H104O6
TRIPALM	kg/day	1.34639e-06	1.34639e-05	1.31748e-23	1.34639e-05	1.34639e-06	C51H98O6
PALM	kg/day	1.69511e-05	1.68131e-07	1.06949e-16	1.68131e-07	8.47554e-09	C16H34O
SN-1--01	kg/day	0	0	0	0	0	C37H70O5-1
SN-1--02	kg/day	1.34639e-06	1.34639e-05	1.27917e-20	1.34639e-05	1.34639e-06	C37H68O5-1
XYLOSE	kg/day	0.000497685	0.000382817	6.948e-14	0.000382817	0.000497685	C5H10O5
FURFURAL	kg/day	2.45006e-05	0	3.91174e-07	0	2.41095e-05	C5H4O2
LINOLEIC	kg/day	5.79136e-06	5.72718e-08	2.49868e-18	5.72718e-08	2.89568e-09	C18H32O2
STARCH	kg/day	0	0	0	0	0	CELLULOSE
ETHANOL	kg/day	0.00084075	0.00167629	2.32386e-05	0.00167629	0.000817512	C2H6O-2
PROTEIN	kg/day	9.88022e-06	9.88022e-05	1.33005e-06	9.88022e-05	8.55017e-06	C13H25O7N3S
KERATIN	kg/day	2.69613e-07	5.39225e-07	2.69552e-07	5.39225e-07	6.11159e-11	C4.39H8NO2.1
ACETATE	kg/day	0	0	0	0	0	CH3COO-
INERT	kg/day	0.00370659	0.00370659	1.44405e-16	0.00370659	0.00370659	INERT
Mass Fractions
WATER		0.941211	0.942101	0.112554	0.942101	0.959187	H2O
GLYCEROL		0.000147669	0.000134138	2.97225e-10	0.000134138	0.000118291	C3H8O3
OLEIC-AC		3.50087e-05	3.47358e-07	3.40357e-13	3.47358e-07	9.60207e-06	C18H3402
DEXTROSE		0.019044	0.0168284	5.01303e-14	0.0168284	0.00373758	C6H12O6
ACETI-AC		0.0135907	0.00607727	0.000557121	0.00607727	0.00351565	C2H4O2-1
PROPI-01		0.000130134	0.000130134	0.000441046	0.000130134	0.00335332	C3H6O2-1
ISOBU-01		0.000128132	0.000128132	4.9075e-05	0.000128132	0.0016695	C4H8O2-4
ISOVA-01		0	2.19226e-08	5.13318e-10	2.19226e-08	2.81107e-09	C5H10O2-D3
H+		0	0	0	0	0	H+
OH-		0	0	0	0	0	OH-
NH3		3.69635e-05	6.18638e-09	3.71914e-11	6.18638e-09	1.63363e-11	NH3
NH4+		0	0	0	0	0	NH4+
CO2		0.00510028	0.00536453	0.526725	0.00536453	0.00543757	CO2
C5H7NO2		0.000234242	0.000234242	2.54341e-06	0.000234242	0.00213661	C5H7NO2
ARGININE		4.8304e-05	4.82497e-05	1.36934e-11	4.82497e-05	5.57043e-05	C6H14N4O2-N2
HISTIDIN		0	1.84132e-15	7.54775e-13	1.84132e-15	3.0704e-06	C6H8N3O2-E
LYSINE		0	0	4.00475e-13	0	1.6327e-06	C6H14N2O2
TYROSINE		0	6.6969e-09	4.08713e-86	6.6969e-09	4.27473e-07	C9H11NO3
TRYPTOPH		0	1.34138e-08	4.60695e-86	1.34138e-08	4.8184e-07	C11H12N2O2
PHENYLAL		9.17059e-06	9.12941e-06	6.8682e-12	9.12941e-06	1.05574e-05	C9H11NO2
CYSTEINE		3.57926e-05	3.57368e-05	2.4039e-13	3.57368e-05	3.94363e-05	C3H6NO2S-E
METHIONI		0	0	9.5025e-86	0	9.93865e-07	C5H11NO2S
THREONIN		4.00823e-08	1.32136e-09	1.28023e-85	1.32136e-09	1.33899e-06	C4H9NO3
SERINE		0.000107236	0.00010711	1.05201e-83	0.00010711	0.00011003	C3H7NO3
LEUCINE		2.96941e-05	2.96306e-05	2.97781e-84	2.96306e-05	3.11448e-05	C6H13NO2
ISOLEUCI		5.14704e-06	5.10526e-06	5.8504e-85	5.10526e-06	6.11893e-06	C6H13NO2-I
VALINE		2.95905e-05	2.95304e-05	2.95721e-84	2.95304e-05	3.09295e-05	C5H11NO2
GLUTAMIC		1.07912e-07	3.25335e-08	6.65262e-13	3.25335e-08	1.68273e-06	C5H9NO4
ASPARTIC		6.69109e-06	6.64685e-06	7.3763e-85	6.64685e-06	7.71486e-06	C4H7NO4
GLYCINE		9.76305e-05	9.75005e-05	6.11146e-13	9.75005e-05	0.000100284	C2H5NO2-D1
ALANINE		3.78286e-06	3.75387e-06	4.25573e-85	3.75387e-06	4.45106e-06	C3H7NO2
PROLINE		6.25529e-05	6.24644e-05	3.92743e-13	6.24644e-05	6.44298e-05	C5H9NO2-N8
HYDROGEN		3.67379e-08	3.67379e-08	0.000240816	3.67379e-08	2.61885e-08	H2
METHANE		0.000773328	1.61166e-08	0.351879	1.61166e-08	0.000999965	CH4
INDOLE		0	4.11424e-09	3.76657e-11	4.11424e-09	2.55298e-07	C8H7N
FROMAMID		0.000237245	0.000237245	1.32035e-07	0.000237245	0.000241915	CH3NO
H2S		2.4709e-05	5.57575e-08	0.00043362	5.57575e-08	2.32582e-05	H2S
CH4S		5.5257e-08	5.5257e-08	5.93169e-06	5.5257e-08	1.83353e-06	CH4S
BENZENE		3.04314e-06	3.04314e-06	0.00310677	3.04314e-06	6.69382e-06	C6H6
PHENOL		0	0	1.07143e-15	0	3.68333e-15	C6H6O
H2CO3		0	0	0	0	0	H2CO3
HCO3-		0	0	0	0	0	HCO3-
CO3-2		0	0	0	0	0	CO3-2
HS-		0	0	0	0	0	HS-
CELLULOS		0.00199406	0.00664685	1.94382e-82	0.00664685	0.00203304	CELLULOSE
HEMECELL		0.00161126	0.00402815	2.86488e-10	0.00402815	0.00164276	C5H8O4
GLUCOSE		0	0	0	0	0	C6H12O6
TRIOLEIN		4.02415e-06	4.02415e-05	2.2543e-22	4.02415e-05	4.10282e-06	C57H104O6
TRIPALM		4.02415e-06	4.02415e-05	2.09088e-21	4.02415e-05	4.10282e-06	C51H98O6
PALM		5.06641e-05	5.02518e-07	1.69731e-14	5.02518e-07	2.58273e-08	C16H34O
SN-1--01		0	0	0	0	0	C37H70O5-1
SN-1--02		4.02415e-06	4.02415e-05	2.03007e-18	4.02415e-05	4.10282e-06	C37H68O5-1
XYLOSE		0.0014875	0.00114418	1.10266e-11	0.00114418	0.00151659	C5H10O5
FURFURAL		7.32286e-05	0	6.20802e-05	0	7.34682e-05	C5H4O2
LINOLEIC		1.73095e-05	1.71176e-07	3.96546e-16	1.71176e-07	8.82395e-09	C18H32O2
STARCH		0	0	0	0	0	CELLULOSE
ETHANOL		0.00251287	0.00501017	0.00368801	0.00501017	0.00249119	C2H6O-2
PROTEIN		2.95304e-05	0.000295304	0.000211082	0.000295304	2.60547e-05	C13H25O7N3S
KERATIN		8.05831e-07	1.61166e-06	4.27784e-05	1.61166e-06	1.86237e-10	C4.39H8NO2.1
ACETATE		0	0	0	0	0	CH3COO-
INERT		0.0110784	0.0110784	2.29174e-14	0.0110784	0.011295	INERT
Volume Flow	l/day	0.343258	0.333017	6.85789	0.333	0.339671
Vapor Phase
Molar Enthalpy	J/kmol			-1.94112e+08
Mass Enthalpy	J/kg			-7.8459e+06
Molar Entropy	J/kmol-K			-38401
Mass Entropy	J/kg-K			-1552.15
Molar Density	kmol/cum			0.0371379
Mass Density	kg/cum			0.918812
Enthalpy Flow	Watt			-0.572198
Average MW				24.7406
Mole Flows	kmol/hr			1.0612e-05
Mole Fractions
Mass Flows	kg/day			0.00630111
Mass Fractions
Liquid Phase
Molar Enthalpy	J/kmol	-2.85634e+08	-2.88129e+08		-2.88133e+08	-2.83728e+08
Mass Enthalpy	J/kg	-1.51276e+07	-1.52498e+07		-1.525e+07	-1.52663e+07
Molar Entropy	J/kmol-K	-157644	-166101		-166115	-156279
Mass Entropy	J/kg-K	-8349.03	-8791.22		-8791.97	-8408.74
Molar Density	kmol/cum	51.622	53.1749		53.1776	51.983
Mass Density	kg/cum	974.709	1004.69		1004.74	966.117
Enthalpy Flow	Watt	-58.5805	-59.0535		-59.0543	-57.9839
Average MW		18.8817	18.894		18.894	18.5853
Mole Flows	kmol/hr	0.000738321	0.000737839		0.000737839	0.000735713
Mole Fractions
Mass Flows	kg/day	0.334577	0.334577		0.334577	0.328162
Mass Fractions
<add properties>

## Sheet: Organic Nitrogen
	Units	INPUT	LIQUID	NUTRIENT	S1	S2	Formula	Molecular Mass	Nitrogen mass fraction	Nitrogen Mol Flow	Organic										Molar Mass
Description
From			B1		B4	B4
To		B2	B4	B2
Stream Class		CONVEN	CONVEN	CONVEN	CONVEN	CONVEN
Maximum Relative Error
Cost Flow	$/sec
MIXED Substream
Phase			Liquid Phase	Liquid Phase	Liquid Phase	Vapor Phase
Temperature	K	296.15	328.15	296.15	328	328
Pressure	N/sqm	101325	101325	101325	101325	101325
Molar Vapor Fraction		0.000299639	0	0	0	1
Molar Liquid Fraction		0.9997	1	1	1	0
Molar Solid Fraction		0	0	0	0	0
Mass Vapor Fraction		0.00179295	0	0	0	1
Mass Liquid Fraction		0.998207	1	1	1	1.44329e-15
Mass Solid Fraction		0	0	0	0	0
Molar Enthalpy	J/kmol	-2.8806e+08	-2.83718e+08	-6.04276e+08	-4.15427e+10	-2.10227e+08
Mass Enthalpy	J/kg	-1.51615e+07	-1.5207e+07	-6.02956e+06	-2.1962e+09	-7.74176e+06
Molar Entropy	J/kmol-K	-167359	-156671	1.03038e+06		-39940.2
Mass Entropy	J/kg-K	-8808.66	-8397.41	10281.3		-1470.82
Molar Density	kmol/cum	38.021	51.5819	5.70723	50.2494	0.0371548
Mass Density	kg/cum	722.375	962.364	571.973	950.501	1.00894
Enthalpy Flow	Watt	-42.2121	-41.5588	-0.000798321	-6118.1	-0.424266
Average MW		18.9994	18.657	100.219	18.9157	27.155
Mole Flows	mol/hr	0.527541	0.527326	4.75603e-06	0.66226	0.00624859	Alias	g/mol			Non Organic										N	14
WATER	mol/hr	0.523448	0.521206	0	0.534726	0.000777908	H2O	18	0	0			Total Nitrogen								C	12
GLYCEROL	mol/hr	0	6.35264e-06	0	6.35264e-06	2.58898e-13	C3H8O3	92	0	0			Organic flow (mol/hr)	0.000950844							H	1
OLEIC-AC	mol/hr	0	1.00723e-07	0	8.16623e-14	4.17371e-23	C18H34O2	282	0	0			Inorganic flow (mol/hr)	0.0215583							O	16
DEXTROSE	mol/hr	0.000556845	2.18952e-07	0	2.18952e-07	4.20247e-20	C6H12O6	180	0	0			Organic mol frac (%)	0.00143576							S	32
ACETI-AC	mol/hr	0	3.18543e-05	0	1.96672e-14	3.56576e-17	C2H4O2	60	0	0			Inorganic mol frac (%)	0.0325527							Fe	56
PROPI-01	mol/hr	0	0.000487717	0	3.97804e-13	4.57917e-16	C3H6O2	74	0	0			Organic concentration (g/l)	0.0539332							Ca	40
ISOBU-01	mol/hr	0	0.000342575	0	1.90331e-10	1.78105e-14	C4H8O2	88	0	0			Inorganic concentration (g/l)	1.22282							P	31
ISOVA-01	mol/hr	0	8.39815e-10	0	7.91568e-15	4.08163e-18	C5H10O2	102	0	0			pH	12.3417	12.8196						K	39
H+	mol/hr	0	0	0	8.02707e-15	0	H+	1	0	0				H+	OH-						Mg	24
OH-	mol/hr	0	0	0	0.00116377	0	OH-	17	0	0			Molar Flow	8.02707e-15	0.00116377
NH3	mol/hr	5.89058e-05	0.000106922	0	0.0261355	0.00110869	H3N	17	0.823529	0.0215233			Volume Flow	0.01763	0.01763
NH4+	mol/hr	0	0	0	5.59404e-15	0	NH4+	18	0.777778	4.35092e-15			Concentration	4.55307e-13	0.0660105	3.0055e-14
CO2	mol/hr	0	0.00128985	0	0.000653386	0.00088532	CO2	14	0	0
C5H7NO2	mol/hr	0	0.000168959	0	0.000168959	2.92421e-09	C5H7NO2	113	0.123894	2.0933e-05
ARGININE	mol/hr	0	3.49022e-06	0	5.41222e-14	1.92506e-22	C6H14N4O2	174	0.321839	1.74186e-14
HISTIDIN	mol/hr	0	2.84238e-22	0	0	0	C6H8N3O2	155	0.270968	0
LYSINE	mol/hr	0	5.10521e-22	0	5.26319e-12	1.86795e-20	C6H14N2O2	146	0.191781	1.00938e-12
TYROSINE	mol/hr	0	2.47354e-21	0	7.23454e-12	1.01571e-92	C9H11NO3	181	0.0773481	5.59577e-13
TRYPTOPH	mol/hr	0	2.5256e-23	0	5.25841e-12	7.38269e-93	C11H12N2O2	204	0.137255	7.21743e-13
PHENYLAL	mol/hr	0	2.79235e-06	0	4.30028e-11	4.05373e-19	C9H11NO2	165	0.0848485	3.64872e-12
CYSTEINE	mol/hr	0	5.19688e-06	0	5.19688e-06	4.57649e-16	C3H6NO2S	121	0.115702	6.01292e-07
METHIONI	mol/hr	0	1.06268e-20	0	5.22655e-12	7.33796e-93	C5H11NO2S	149	0.0939597	4.91085e-13
THREONIN	mol/hr	0	3.64534e-06	0	5.30331e-12	7.44573e-93	C4H9NO3	119	0.117647	6.23919e-13
SERINE	mol/hr	0	1.33412e-05	0	2.11283e-14	2.96636e-95	C3H7NO3	105	0.133333	2.8171e-15
LEUCINE	mol/hr	0	5.42957e-06	0	5.42957e-06	7.623e-87	C6H13NO2	131	0.10687	5.8026e-07
ISOLEUCI	mol/hr	0	3.56801e-06	0	9.67479e-14	1.35832e-94	C6H13NO2	131	0.10687	1.03395e-14
VALINE	mol/hr	0	5.73984e-06	0	2.08799e-14	2.93149e-95	C5H11NO2	117	0.119658	2.49845e-15
GLUTAMIC	mol/hr	0	5.73947e-06	0	9.95687e-14	5.69477e-22	C5H9NO4	147	0.0952381	9.48273e-15
ASPARTIC	mol/hr	0	3.72314e-06	0	2.62913e-11	3.69124e-92	C4H7NO4	133	0.105263	2.76751e-12
GLYCINE	mol/hr	0	1.93901e-05	0	1.93901e-05	1.70712e-15	C2H5NO2	75	0.186667	3.61948e-06
ALANINE	mol/hr	0	3.64557e-06	0	3.64557e-06	5.1183e-87	C3H7NO2	89	0.157303	5.73461e-07
PROLINE	mol/hr	0	8.60975e-06	0	1.18751e-13	1.04575e-23	C5H9NO2	115	0.121739	1.44567e-14
HYDROGEN	mol/hr	0	6.44532e-08	0	7.56428e-08	1.02139e-05	H2	2	0	0
METHANE	mol/hr	0	0.000578623	0	0.000664276	0.00342711	CH4	16	0	0
INDOLE	mol/hr	0	6.78531e-23	0	0	0	C8H7N	117	0.837607	0
FROMAMID	mol/hr	0	3.5663e-22	0	0	0	CH3NO	45	0.311111	0
H2S	mol/hr	0	5.57738e-05	0	2.48975e-10	7.20634e-11	H2S	34	0	0
CH4S	mol/hr	0	1.71518e-21	0	0	0	CH4S	48	0	0
BENZENE	mol/hr	0	2.00614e-11	0	1.2312e-10	5.53319e-11	C6H6	78	0	0
PHENOL	mol/hr	0	3.33232e-19	0	0	0	C6H6O	94	0	0
H2CO3	mol/hr	0	0	0	7.71731e-13	7.32635e-20	H2CO3	62	0	0
HCO3-	mol/hr	0	0	0	0.0171247	0	HCO3-	61	0	0
CO3-2	mol/hr	0	0	0	0.0071455	0	CO3--	60	0	0
HS-	mol/hr	0	0	0	0.00329493	0	HS-	33	0	0
CELLULOS	mol/hr	0.00136117	0.000408352	0	0.000408352	5.73317e-85	C6H10O5	162	0	0
HEMECELL	mol/hr	0.000759331	0.000303732	0	0.000303732	7.64687e-13	C5H8O4	132	0	0
GLUCOSE	mol/hr	0	0	0	0	0	C6H12O6	180	0	0
TRIOLEIN	mol/hr	4.53207e-06	4.53207e-07	0	4.53207e-07	3.55431e-25	C57H104O6	884	0	0
TRIPALM	mol/hr	4.97567e-06	4.97567e-07	0	4.97567e-07	3.62387e-24	C51H98O6	806	0	0
PALM	mol/hr	0	1.48414e-07	0	1.48414e-07	1.40588e-15	C16H34O	242	0	0
SN-1--01	mol/hr	0	0	0	0	0	C37H70O5	594	0	0
SN-1--02	mol/hr	6.77082e-06	6.77082e-07	0	6.77082e-07	4.80676e-21	C37H68O5	592	0	0
XYLOSE	mol/hr	0	7.59331e-05	0	7.59331e-05	8.00431e-15	C5H10O5	150	0	0
FURFURAL	mol/hr	0	0	0	0	0	C5H4O2	96	0	0
LINOLEIC	mol/hr	0	4.97097e-08	0	4.97097e-08	3.22102e-17	C18H32O2	280	0	0
STARCH	mol/hr	0	0	0	0	0	C6H10O5	162	0	0
ETHANOL	mol/hr	0	0.00106191	0	0.00107688	1.206e-05	C2H6O	62	0	0
PROTEIN	mol/hr	8.19116e-05	7.28678e-06	0	7.97696e-06	2.142e-07	C13H25O7N3S	367	0.114441	9.12894e-07
KERATIN	mol/hr	0.000155141	2.30273e-08	0	5.06851e-05	2.68852e-05	C(4.89)H8NO(2.1)S(0.67)	116.424	0.12025	6.09489e-06
ACETATE	mol/hr	0	0	0	3.19502e-05	0	CH3COO-	59	0	0
INERT	mol/hr	0.00110352	0.00110352	0	0.00110352	1.20651e-19	INERT	x	0.83	0.00091592
C3H5O2-	mol/hr	0	0	0	0.000488691	1.35128e-07	C3H5O2-	73	0	0
C5H9O2-	mol/hr	0	0	0	1.25379e-08	6.52088e-13	C5H9O2-	101	0	0
C4H7O2-	mol/hr	0	0	0	0.000342712	4.72231e-08	C4H7O2-	87	0	0
C18H33O2	mol/hr	0	0	0	1.17494e-07	6.00954e-17	C18H33O2	281	0	0
C3H6NO3-	mol/hr	0	0	0	1.10751e-12	0	C3H6NO3-	104	0.134615	1.49088e-13
C5H10NO2	mol/hr	0	0	0	1.28201e-12	1.79991e-93	C5H10NO2-	116	0.12069	1.54725e-13
C5H8NO4-	mol/hr	0	0	0	3.7232e-06	2.12983e-14	C5H8NO4-	146	0.0958904	3.5702e-07
ISOLE-01	mol/hr	0	0	0	3.96688e-06	5.56941e-87	C6H12NO2-	130	0.107692	4.27202e-07
PROLI-01	mol/hr	0	0	0	4.26001e-06	3.75146e-16	C5H8NO2-	114	0.122807	5.23159e-07
TYROS-01	mol/hr	0	0	0	1.45216e-12	4.39569e-24	C9H10NO3-	164	0.0853659	1.23965e-13
TRYPT-01	mol/hr	0	0	0	7.46874e-13	4.96725e-24	C11H11N2O2-	203	0.137931	1.03017e-13
ARGIN-01	mol/hr	0	0	0	4.96823e-10	2.70354e-12	C6H13N4O2-	173	0.323699	1.60821e-10
LYSIN-01	mol/hr	0	0	0	5.41432e-14	1.92191e-22	C6H13N2O2-	145	0.193103	1.04552e-14
PHENY-01	mol/hr	0	0	0	6.58983e-12	6.21308e-20	C9H10NO2-	164	0.0853659	5.62546e-13
METHI-01	mol/hr	0	0	0	1.09076e-12	1.53141e-93	C5H10NO2S-	148	0.0945946	1.0318e-13
THREO-01	mol/hr	0	0	0	7.06102e-14	9.91351e-95	C4H8NO3-	118	0.118644	8.37748e-15
ASPAR-01	mol/hr	0	0	0	8.15852e-13	1.14544e-93	C4H6NO4-	132	0.106061	8.65298e-14
C4H6NO4-	mol/hr	0	0	0	8.65134e-12	1.21463e-92	C4H6NO4-	132	0.106061	9.17566e-13
C6H13N2O	mol/hr	0	0	0	1.7265e-10	6.12852e-19	C6H13N2O2-	145	0.193103	3.33393e-11
TYROS-02	mol/hr	0	0	0	1.60665e-07	4.86332e-19	C9H10NO3-	164	0.0853659	1.37153e-08
TYROS-03	mol/hr	0	0	0	1.61304e-13	4.88268e-25	C9H10NO3-	164	0.0853659	1.37699e-14
TRYPT-02	mol/hr	0	0	0	5.14031e-11	3.41867e-22	C11H11N2O2-	173	0.16185	8.31957e-12
ARGIN-02	mol/hr	0	0	0	5.16033e-07	2.80807e-09	C6H13N4O2-	173	0.323699	1.6704e-07
ARGIN-03	mol/hr	0	0	0	1.16022e-13	6.31351e-16	C6H13N4O2-	173	0.323699	3.75562e-14
PHENY-02	mol/hr	0	0	0	1.03501e-06	9.75833e-15	C9H10NO2-	164	0.0853659	8.83542e-08
METHI-02	mol/hr	0	0	0	3.73719e-11	5.24693e-92	C5H10NO2S-	148	0.0945946	3.53518e-12
THREO-02	mol/hr	0	0	0	2.66755e-07	3.74518e-88	C4H8NO3	118	0.118644	3.16489e-08
AMMON(S)	mol/hr	0	0	0	0	0	NH2COONH4	78	0.358974	0
NH4HS(S)	mol/hr	0	0	0	1.57387e-08	2.20968e-89	NH4HS	51	0.27451	4.32044e-09
SALT1	mol/hr	0	0	0	0.000197552	2.77358e-85	NH4HCO3	79	0.177215	3.50092e-05
S--	mol/hr	0	0	0	0	0	S-2	32	0	0
NH2COO	mol/hr	0	0	0	2.77389e-15	0	NH2COO-	230	0.0608696	1.68846e-16
H3PO4	mol/hr	0	0	0	2.07128e-14	4.05294e-30	H3PO4	98	0	0
H2PO4-	mol/hr	0	0	0	3.37566e-06	0	H2PO4-	97	0	0
HPO4--	mol/hr	0	0	0	8.97405e-10	0	HPO4-2	96	0	0
PO4---	mol/hr	0	0	0	4.03311e-06	0	PO4-3	95	0	0
DIAMM-01	mol/hr	0	0	0	0	0	(NH4)2HPO4	132	0.106061	0
SALT3	mol/hr	0	0	0	0	0	NH6PO4	115	0.243478	0
K+	mol/hr	0	0	0	3.75789e-10	0	K+	39	0	0
KH2PO4	mol/hr	0	1.58534e-06	1.58534e-06	0.0104421	1.46605e-83	KH2PO4	136	0	0
K2HPO4	mol/hr	0	0	0	0.00031258	4.38855e-85	K2HPO4	270	0	0
K2CO3	mol/hr	0	0	0	0	0	K2CO3	138	0	0
KHCO3	mol/hr	0	0	0	0	0	KHCO3	100	0	0
K3PO4	mol/hr	0	0	0	0	0	K3PO4	249	0	0
MG(OH)2	mol/hr	0	7.92671e-07	7.92671e-07	7.29526e-05	1.02424e-85	MG(OH)2	58	0	0
MG++	mol/hr	0	0	0	0.00889245	0	MG+2	24	0	0
STRUVITE	mol/hr	0	0	0	0	0	NH4MgPO4.6H2O	245	0.114286	0
FE+++	mol/hr	0	0	0	0	0	FE+3	56	0	0
FE(OH)2	mol/hr	0	7.92671e-07	7.92671e-07	9.55588e-05	1.34162e-85	FE(OH)2	90	0	0
FE++	mol/hr	0	0	0	0.00947431	0	FE+2	56	0	0
FE(OH)3	mol/hr	0	7.92671e-07	7.92671e-07	7.90778e-07	1.11024e-87	FE(OH)3	107	0	0
FES	mol/hr	0	0	0	0	0	FES	88	0	0
FECO3	mol/hr	0	0	0	4.72066e-20	1.87714e-96	FECO3	116	0	0
CA(OH)2	mol/hr	0	7.92671e-07	7.92671e-07	5.9927e-05	8.41362e-86	CA(OH)2	74	0	0
CA++	mol/hr	0	0	0	0.00825062	0	CA+2	40	0	0
CACO3	mol/hr	0	0	0	0	0	CACO3	100	0	0
HCL	mol/hr				2.84722e-09	2.40244e-09
CL-	mol/hr	0.992241	0.988393	0	0.0294301	0
Mole Fractions		0	1.20469e-05	0
WATER		0	1.91008e-07	0	0.807426	0.124493
GLYCEROL		0.00105555	4.15211e-07	0	9.59237e-06	4.14331e-11
OLEIC-AC		0	6.04073e-05	0	1.23309e-13	6.67944e-21
DEXTROSE		0	0.000924887	0	3.30614e-07	6.72548e-18
ACETI-AC		0	0.000649644	0	2.9697e-14	5.7065e-15
PROPI-01		0	1.59259e-09	0	6.00677e-13	7.32833e-14
ISOBU-01		0	0	0	2.87396e-10	2.85032e-12
ISOVA-01		0	0	0	1.19525e-14	6.53208e-16
H+		0.000111661	0.000202763	0	1.21207e-14	0
OH-		0	0	0	0.00175727	0
NH3		0	0.00244602	0	0.0394641	0.17743
NH4+		0	0.000320406	0	8.4469e-15	0
CO2		0	6.6187e-06	0	0.000986601	0.141683
C5H7NO2		0	5.39017e-22	0	0.000255125	4.6798e-07
ARGININE		0	9.68131e-22	0	8.17236e-14	3.08079e-20
HISTIDIN		0	4.69072e-21	0	0	0
LYSINE		0	4.78945e-23	0	7.94732e-12	2.98939e-18
TYROSINE		0	5.2953e-06	0	1.0924e-11	1.62551e-90
TRYPTOPH		0	9.85514e-06	0	7.9401e-12	1.1815e-90
PHENYLAL		0	2.01522e-20	0	6.49334e-11	6.48744e-17
CYSTEINE		0	6.91287e-06	0	7.84719e-06	7.32404e-14
METHIONI		0	2.52998e-05	0	7.89199e-12	1.17434e-90
THREONIN		0	1.02964e-05	0	8.00791e-12	1.19159e-90
SERINE		0	6.76622e-06	0	3.19033e-14	4.74725e-93
LEUCINE		0	1.08848e-05	0	8.19856e-06	1.21996e-84
ISOLEUCI		0	1.08841e-05	0	1.46087e-13	2.1738e-92
VALINE		0	7.0604e-06	0	3.15283e-14	4.69145e-93
GLUTAMIC		0	3.67706e-05	0	1.50347e-13	9.11369e-20
ASPARTIC		0	6.91331e-06	0	3.96994e-11	5.90732e-90
GLYCINE		0	1.63272e-05	0	2.92787e-05	2.732e-13
ALANINE		0	1.22226e-07	0	5.50475e-06	8.19113e-85
PROLINE		0	0.00109728	0	1.79312e-13	1.67358e-21
HYDROGEN		0	1.28674e-22	0	1.14219e-07	0.00163459
METHANE		0	6.76299e-22	0	0.00100304	0.548461
INDOLE		0	0.000105767	0	0	0
FROMAMID		0	3.2526e-21	0	0	0
H2S		0	3.80436e-11	0	3.75948e-10	1.15328e-08
CH4S		0	6.31928e-19	0	0	0
BENZENE		0	0	0	1.85909e-10	8.85511e-09
PHENOL		0	0	0	0	0
H2CO3		0	0	0	1.1653e-12	1.17248e-17
HCO3-		0	0	0	0.025858	0
CO3-2		0.00258022	0.000774381	0	0.0107896	0
HS-		0.00143938	0.000575985	0	0.00497529	0
CELLULOS		0	0	0	0.000616603	9.17514e-83
HEMECELL		8.59094e-06	8.59444e-07	0	0.00045863	1.22378e-10
GLUCOSE		9.4318e-06	9.43565e-07	0	0	0
TRIOLEIN		0	2.81445e-07	0	6.84335e-07	5.68818e-23
TRIPALM		0	0	0	7.51317e-07	5.79951e-22
PALM		1.28347e-05	1.28399e-06	0	2.24102e-07	2.24992e-13
SN-1--01		0	0.000143996	0	0	0
SN-1--02		0	0	0	1.02238e-06	7.69255e-19
XYLOSE		0	9.42674e-08	0	0.000114658	1.28098e-12
FURFURAL		0	0	0	0	0
LINOLEIC		0	0.00201375	0	7.50608e-08	5.15479e-15
STARCH		0.00015527	1.38183e-05	0	0	0
ETHANOL		0.000294082	4.36679e-08	0	0.00162607	0.00193004
PROTEIN		0	0	0	1.20451e-05	3.42798e-05
KERATIN		0.00209181	0.00209267	0	7.65336e-05	0.0043026
ACETATE		0	0	0	4.82443e-05	0
INERT		0	0	0	0.00166629	1.93086e-17
C3H5O2-		0	0	0	0.000737914	2.16254e-05
C5H9O2-		0	0	0	1.8932e-08	1.04358e-10
C4H7O2-		0	0	0	0.000517489	7.55741e-06
C18H33O2		0	0	0	1.77414e-07	9.61744e-15
C3H6NO3-		0	0	0	1.67232e-12	0
C5H10NO2		0	0	0	1.93581e-12	2.88051e-91
C5H8NO4-		0	0	0	5.62197e-06	3.40849e-12
ISOLE-01		0	0	0	5.98992e-06	8.91307e-85
PROLI-01		0	0	0	6.43254e-06	6.0037e-14
TYROS-01		0	0	0	2.19274e-12	7.03469e-22
TRYPT-01		0	0	0	1.12777e-12	7.94939e-22
ARGIN-01		0	0	0	7.50193e-10	4.32664e-10
LYSIN-01		0	0	0	8.17552e-14	3.07575e-20
PHENY-01		0	0	0	9.95052e-12	9.94318e-18
METHI-01		0	0	0	1.64703e-12	2.45081e-91
THREO-01		0	0	0	1.0662e-13	1.58652e-92
ASPAR-01		0	0	0	1.23192e-12	1.83312e-91
C4H6NO4-		0	0	0	1.30634e-11	1.94385e-90
C6H13N2O		0	0	0	2.60698e-10	9.80785e-17
TYROS-02		0	0	0	2.42601e-07	7.78307e-17
TYROS-03		0	0	0	2.43567e-13	7.81405e-23
TRYPT-02		0	0	0	7.76177e-11	5.47111e-20
ARGIN-02		0	0	0	7.79201e-07	4.49393e-07
ARGIN-03		0	0	0	1.75191e-13	1.01039e-13
PHENY-02		0	0	0	1.56284e-06	1.56169e-12
METHI-02		0	0	0	5.64309e-11	8.39699e-90
THREO-02		0	0	0	4.02795e-07	5.99364e-86
AMMON(S)		0	0	0	0	0
NH4HS(S)		0	0	0	2.37652e-08	3.53629e-87
SALT1		0	0	0	0.0002983	4.43874e-83
S--		0	0	0	0	0
NH2COO		0	0	0	4.18852e-15	0
H3PO4		0	0	0	3.12759e-14	6.48618e-28
H2PO4-		0	0	0	5.09719e-06	0
HPO4--		0	0	0	1.35507e-09	0
PO4---		0	0	0	6.08992e-06	0
DIAMM-01		0	0	0	0	0
SALT3		0	3.00638e-06	0.333333	0	0
K+		0	0	0	5.67434e-10	0
KH2PO4		0	0	0	0.0157674	2.3462e-81
K2HPO4		0	0	0	0.00047199	7.02327e-83
K2CO3		0	0	0	0	0
KHCO3		0	1.50319e-06	0.166667	0	0
K3PO4		0	0	0	0	0
MG(OH)2		0	0	0	0.000110157	1.63915e-83
MG++		0	0	0	0.0134274	0
STRUVITE		0	1.50319e-06	0.166667	0	0
FE+++		0	0	0	0	0
FE(OH)2		0	1.50319e-06	0.166667	0.000144292	2.14709e-83
FE++		0	0	0	0.014306	0
FE(OH)3		0	0	0	1.19406e-06	1.77678e-85
FES		0	1.50319e-06	0.166667	0	0
FECO3		0	0	0	7.12811e-20	3.00411e-94
CA(OH)2		0	0	0	9.04887e-05	1.34648e-83
CA++		0.240551	0.23612	1.14395e-05	0.0124583	0
CACO3		0.226322	0.225352	0	0	0
HCL		0	1.40411e-05	0	4.29926e-09	3.84478e-07
CL-		0	6.82808e-07	0	0.044439	0
Mass Flows	kg/day	0.00240768	9.46701e-07	0	0.377487	0.00313531
WATER	kg/day	0	4.59104e-05	0	0.231198	0.000336341
GLYCEROL	kg/day	0	0.000867116	0	1.40411e-05	5.72236e-13
OLEIC-AC	kg/day	0	0.000724392	0	5.53592e-13	2.82937e-22
DEXTROSE	kg/day	0	2.05855e-09	0	9.46701e-07	1.81706e-19
ACETI-AC	kg/day	0	0	0	2.83455e-14	5.13919e-17
PROPI-01	kg/day	0	0	0	7.07258e-13	8.14134e-16
ISOBU-01	kg/day	2.40768e-05	4.37027e-05	0	4.02464e-10	3.76612e-14
ISOVA-01	kg/day	0	0	0	1.94029e-14	1.00049e-17
H+	kg/day	0	0.00136239	0	1.9265e-16	0
OH-	kg/day	0	0.000458687	0	0.000475022	0
NH3	kg/day	0	1.45921e-05	0	0.0106824	0.000453158
NH4+	kg/day	0	1.05156e-21	0	2.4218e-15	0
CO2	kg/day	0	1.79119e-21	0	0.00069013	0.000935106
C5H7NO2	kg/day	0	1.07564e-20	0	0.000458688	7.93861e-09
ARGININE	kg/day	0	1.23792e-22	0	2.26278e-13	8.04842e-22
HISTIDIN	kg/day	0	1.10706e-05	0	0	0
LYSINE	kg/day	0	1.4986e-05	0	1.84661e-11	6.55378e-20
TYROSINE	kg/day	0	3.8056e-20	0	3.146e-11	4.41692e-92
TRYPTOPH	kg/day	0	1.04216e-05	0	2.5774e-11	3.61862e-92
PHENYLAL	kg/day	0	3.36499e-05	0	1.70489e-10	1.60715e-18
CYSTEINE	kg/day	0	1.70934e-05	0	1.4986e-05	1.3197e-15
METHIONI	kg/day	0	1.12328e-05	0	1.8717e-11	2.62782e-92
THREONIN	kg/day	0	1.61378e-05	0	1.51616e-11	2.12865e-92
SERINE	kg/day	0	2.02669e-05	0	5.32906e-14	7.48189e-95
LEUCINE	kg/day	0	1.18935e-05	0	1.70934e-05	2.39987e-86
ISOLEUCI	kg/day	0	3.49335e-05	0	3.04581e-13	4.27625e-94
VALINE	kg/day	0	7.79517e-06	0	5.87049e-14	8.24203e-95
GLUTAMIC	kg/day	0	2.37902e-05	0	3.51591e-13	2.0109e-21
ASPARTIC	kg/day	0	3.11832e-09	0	8.39874e-11	1.17917e-91
GLYCINE	kg/day	0	0.000222785	0	3.49335e-05	3.07556e-15
ALANINE	kg/day	0	1.90776e-22	0	7.79517e-06	1.09443e-86
PROLINE	kg/day	0	3.85511e-22	0	3.2813e-13	2.88958e-23
HYDROGEN	kg/day	0	4.5621e-05	0	3.65969e-09	4.9416e-07
METHANE	kg/day	0	1.98036e-21	0	0.000255764	0.00131953
INDOLE	kg/day	0	3.76097e-11	0	0	0
FROMAMID	kg/day	0	7.52676e-19	0	0	0
H2S	kg/day	0	0	0	2.03653e-10	5.89454e-11
CH4S	kg/day	0	0	0	0	0
BENZENE	kg/day	0	0	0	2.30816e-10	1.03732e-10
PHENOL	kg/day	0	0	0	0	0
H2CO3	kg/day	0.00529689	0.00158907	0	1.1488e-12	1.0906e-19
HCO3-	kg/day	0.00240768	0.000963071	0	0.0250776	0
CO3-2	kg/day	0	0	0	0.0102911	0
HS-	kg/day	9.63071e-05	9.63071e-06	0	0.00261543	0
CELLULOS	kg/day	9.63071e-05	9.63071e-06	0	0.00158907	2.23101e-84
HEMECELL	kg/day	0	9.12369e-07	0	0.000963071	2.42466e-12
GLUCOSE	kg/day	0	0	0	0	0
TRIOLEIN	kg/day	9.63071e-05	9.63071e-06	0	9.63071e-06	7.55295e-24
TRIPALM	kg/day	0	0.000273599	0	9.63071e-06	7.01423e-23
PALM	kg/day	0	0	0	9.12369e-07	8.64263e-15
SN-1--01	kg/day	0	3.34587e-07	0	0	0
SN-1--02	kg/day	0	0	0	9.63071e-06	6.83706e-20
XYLOSE	kg/day	0	0.0011741	0	0.000273599	2.88408e-14
FURFURAL	kg/day	0.000722303	6.42554e-05	0	0	0
LINOLEIC	kg/day	0.000433382	6.43261e-08	0	3.34587e-07	2.16801e-16
STARCH	kg/day	0	0	0	0	0
ETHANOL	kg/day	0.00264844	0.00264844	0	0.00119066	1.33342e-05
PROTEIN	kg/day	0	0	0	7.03415e-05	1.88884e-06
KERATIN	kg/day	0	0	0	0.000141588	7.51032e-05
ACETATE	kg/day	0	0	0	4.52758e-05	0
INERT	kg/day	0	0	0	0.00264844	2.89563e-19
C3H5O2-	kg/day	0	0	0	0.000857025	2.36977e-07
C5H9O2-	kg/day	0	0	0	3.04296e-08	1.58262e-12
C4H7O2-	kg/day	0	0	0	0.000716392	9.87133e-08
C18H33O2	kg/day	0	0	0	7.96498e-07	4.07389e-16
C3H6NO3-	kg/day	0	0	0	2.76664e-12	0
C5H10NO2	kg/day	0	0	0	3.57342e-12	5.017e-93
C5H8NO4-	kg/day	0	0	0	1.30571e-05	7.46919e-14
ISOLE-01	kg/day	0	0	0	1.23925e-05	1.73989e-86
PROLI-01	kg/day	0	0	0	1.16681e-05	1.02752e-15
TYROS-01	kg/day	0	0	0	6.27973e-12	1.90087e-23
TRYPT-01	kg/day	0	0	0	3.64273e-12	2.42267e-23
ARGIN-01	kg/day	0	0	0	2.06513e-09	1.12377e-11
LYSIN-01	kg/day	0	0	0	1.88654e-13	6.69662e-22
PHENY-01	kg/day	0	0	0	2.59667e-11	2.44821e-19
METHI-01	kg/day	0	0	0	3.87978e-12	5.44713e-93
THREO-01	kg/day	0	0	0	2.00159e-13	2.81018e-94
ASPAR-01	kg/day	0	0	0	2.5865e-12	3.63139e-93
C4H6NO4-	kg/day	0	0	0	2.76367e-11	3.88013e-92
C6H13N2O	kg/day	0	0	0	6.0575e-10	2.15022e-18
TYROS-02	kg/day	0	0	0	6.98665e-07	2.11486e-18
TYROS-03	kg/day	0	0	0	7.01447e-13	2.12328e-24
TRYPT-02	kg/day	0	0	0	2.51951e-10	1.67566e-21
ARGIN-02	kg/day	0	0	0	2.15747e-06	1.17402e-08
ARGIN-03	kg/day	0	0	0	4.85073e-13	2.6396e-15
PHENY-02	kg/day	0	0	0	4.10339e-06	3.86879e-14
METHI-02	kg/day	0	0	0	1.33834e-10	1.879e-91
THREO-02	kg/day	0	0	0	7.62623e-07	1.07071e-87
AMMON(S)	kg/day	0	0	0	0	0
NH4HS(S)	kg/day	0	0	0	1.93067e-08	2.71062e-89
SALT1	kg/day	0	0	0	0.000374822	5.26242e-85
S--	kg/day	0	0	0	0	0
NH2COO	kg/day	0	0	0	3.9966e-15	0
H3PO4	kg/day	0	0	0	4.8714e-14	9.53205e-30
H2PO4-	kg/day	0	0	0	7.85755e-06	0
HPO4--	kg/day	0	0	0	2.0672e-09	0
PO4---	kg/day	0	5.17781e-06	5.17781e-06	9.19288e-06	0
DIAMM-01	kg/day	0	0	0	0	0
SALT3	kg/day	0	0	0	0	0
K+	kg/day	0	0	0	3.5262e-10	0
KH2PO4	kg/day	0	0	0	0.0341044	4.78818e-83
K2HPO4	kg/day	0	1.10948e-06	1.10948e-06	0.00130665	1.83451e-84
K2CO3	kg/day	0	0	0	0	0
KHCO3	kg/day	0	0	0	0	0
K3PO4	kg/day	0	0	0	0	0
MG(OH)2	kg/day	0	1.70954e-06	1.70954e-06	0.00010211	1.4336e-85
MG++	kg/day	0	0	0	0.00518691	0
STRUVITE	kg/day	0	2.03309e-06	2.03309e-06	0	0
FE+++	kg/day	0	0	0	0	0
FE(OH)2	kg/day	0	0	0	0.00020609	2.89346e-85
FE++	kg/day	0	1.40955e-06	1.40955e-06	0.0126984	0
FE(OH)3	kg/day	0	0	0	2.02823e-06	2.84759e-87
FES	kg/day	0	0	0	0	0
FECO3	kg/day				1.3126e-19	5.21948e-96
CA(OH)2	kg/day	0.940847	0.954395	0	0.000106564	1.49613e-85
CA++	kg/day	0	5.94657e-05	0	0.00793582	0
CACO3	kg/day	0	2.89178e-06	0	0	0
HCL	kg/day	0.010009	4.0094e-06	0	2.49148e-09	2.10227e-09
CL-	kg/day	0	0.000194437	0	0.0250415	0
Mass Fractions		0	0.00367235	0
WATER		0	0.00306789	0	0.0233307	0.168177
GLYCEROL		0	8.71823e-09	0
OLEIC-AC		0	0	0		-1.35213e+08
DEXTROSE		0	0	0		-6.46743e+06
ACETI-AC		0.00010009	0.000185087	0		-56359.8
PROPI-01		0	0	0		-2695.76
ISOBU-01		0	0.00576989	0		0.0371548
ISOVA-01		0	0.0019426	0		0.776789
H+		0	6.17996e-05	0		-0.234692
OH-		0	4.45347e-21	0		20.9068
NH3		0	7.58591e-21	0		6.24859e-06
NH4+		0	4.55548e-20	0
CO2		0	5.24276e-22	0		0.00313531
C5H7NO2		0	4.68853e-05	0
ARGININE		0	6.34676e-05	0
HISTIDIN		0	1.61172e-19	0	-4.59416e+07
LYSINE		0	4.41369e-05	0	-1.93439e+06
TYROSINE		0	0.000142511	0	1.06482e+38
TRYPTOPH		0	7.23925e-05	0	4.48346e+36
PHENYLAL		0	4.75722e-05	0	28.3857
CYSTEINE		0	6.83458e-05	0	674.159
METHIONI		0	8.58328e-05	0	-8.45146
THREONIN		0	5.03707e-05	0	23.7499
SERINE		0	0.000147948	0	0.00066226
LEUCINE		0	3.30136e-05	0
ISOLEUCI		0	0.000100755	0	0.377487
VALINE		0	1.32065e-08	0	3.31059e-14	2.84318e-93
GLUTAMIC		0	0.000943523	0	0.0011343	3.96845e-10
ASPARTIC		0	8.07962e-22	0	1.81777e-12	1.56112e-91
GLYCINE		0	1.63269e-21	0	0.00011706	6.3042e-13
ALANINE		0	0.000193211	0	2.61212e-05	2.24332e-84
PROLINE		0	8.3871e-21	0	0.00109433	5.89489e-12
HYDROGEN		0	1.59282e-10	0	5.13444e-09	4.24086e-05
METHANE		0	3.18768e-18	0	0.000394655	0.124547
INDOLE		0	0	0	0	0
FROMAMID		0	0	0	0	0
H2S		0	0	0	6.53389e-10	1.12682e-08
CH4S		0	0	0	0	0
BENZENE		0.0220198	0.0067299	0	2.68663e-10	2.17367e-08
PHENOL		0.010009	0.00407873	0	0	0
H2CO3		0	0	0	4.55592e-10	2.64568e-15
HCO3-		0.00040036	4.07873e-05	0	1.02729e-08	0
CO3-2		0.00040036	4.07873e-05	0	4.86172e-18	0
HS-		0	3.864e-06	0	0.00186256	0
CELLULOS		0	0	0	0.00532487	4.57306e-82
HEMECELL		0.00040036	4.07873e-05	0	0.00322719	4.96999e-10
GLUCOSE		0	0.00115873	0	0	0
TRIOLEIN		0	0	0	3.22719e-05	1.54818e-21
TRIPALM		0	1.41702e-06	0	3.22719e-05	1.43775e-20
PALM		0	0	0	3.0573e-06	1.77154e-12
SN-1--01		0	0.00497248	0	0	0
SN-1--02		0.0030027	0.00027213	0	3.22719e-05	1.40144e-17
XYLOSE		0.00180162	2.72429e-07	0	0.000916813	5.91169e-12
FURFURAL		0	0	0	0	0
LINOLEIC		0.0110099	0.0112165	0	1.12118e-06	4.44391e-14
STARCH		0	0	0	0	0
ETHANOL		0	0	0	0.00388729	0.00375417
PROTEIN		0	0	0	0.000224068	0.000458276
KERATIN		0	0	0	6.72902e-05	0.0168007
ACETATE		0	0	0	0.000135385	0
INERT		0	0	0	0.00887478	3.45319e-16
C3H5O2-		0	0	0	0.00235915	3.99031e-05
C5H9O2-		0	0	0	2.5532e-05	8.12276e-08
C4H7O2-		0	0	0	0.00127168	1.07187e-05
C18H33O2		0	0	0	0.000232706	7.28066e-12
C3H6NO3-		0	0	0	6.04559e-06	0
C5H10NO2		0	0	0	0	0
C5H8NO4-		0	0	0	1.92427e-08	6.73336e-15
ISOLE-01		0	0	0	2.09143e-08	1.79615e-87
PROLI-01		0	0	0	1.86215e-08	1.0031e-16
TYROS-01		0	0	0	2.21037e-12	4.09275e-22
TRYPT-01		0	0	0	1.08586e-19	8.17251e-24
ARGIN-01		0	0	0	2.05634e-14	6.84486e-15
LYSIN-01		0	0	0	1.65318e-16	3.11616e-21
PHENY-01		0	0	0	8.011e-12	4.62017e-18
METHI-01		0	0	0	6.48191e-20	1.25819e-93
THREO-01		0	0	0	2.63963e-20	1.00271e-93
ASPAR-01		0	0	0	1.83255e-17	1.12142e-93
C4H6NO4-		0	0	0	4.01257e-12	3.44604e-91
C6H13N2O		0	0	0	5.98909e-08	1.30043e-14
TYROS-02		0	0	0	1.77467e-05	3.28601e-15
TYROS-03		0	0	0	2.44311e-13	4.5237e-23
TRYPT-02		0	0	0	2.01882e-14	8.21304e-24
ARGIN-02		0	0	0	2.84522e-06	9.47077e-07
ARGIN-03		0	0	0	2.17011e-16	1.34435e-16
PHENY-02		0	0	0	0.000157817	9.10176e-11
METHI-02		0	0	0	1.47499e-14	1.26674e-93
THREO-02		0	0	0	1.17752e-14	1.01127e-93
AMMON(S)		0	0	0	0	0
NH4HS(S)		0	0	0	0.000623556	5.35518e-83
SALT1		0	0	0	0	0
S--		0	0	0	0	0
NH2COO		0	0	0	0	0
H3PO4		0	0	0	0.0050514	6.0462e-17
H2PO4-		0	2.19287e-05	0.452627	0.025316	0
HPO4--		0	0	0	5.62632e-09	0
PO4---		0	0	0	1.45915e-20	0
DIAMM-01		0	0	0	0	0
SALT3		0	0	0	0	0
K+		0	4.69879e-06	0.096987	0.0114253	0
KH2PO4		0	0	0	1.82906e-17	1.15529e-93
K2HPO4		0	0	0	0	0
K2CO3		0	0	0	0	0
KHCO3		0	7.24012e-06	0.149442	0	0
K3PO4		0	0	0	0	0
MG(OH)2		0	8.61039e-06	0.177726	0	0
MG++		0	0	0	0.00583517	0
STRUVITE		0	0	0	0	0
FE+++		0	5.96961e-06	0.123218	0	0
FE(OH)2		0	0	0	0	0
FE++		0	0	0	0.0180886	0
FE(OH)3		0.013875	0.0102231	8.33333e-07	6.79649e-06	5.83691e-85
FES					0	0
FECO3		-2.31039e+08			0	0
CA(OH)2		-2.03224e+06			0	0
CA++		-764281			0.011387	0
CACO3		-6722.69			0	0
HCL		0.0411507			7.0539e-10	3.64082e-08
CL-		4.6783			0.091845	0
Volume Flow	l/hr	-0.0101447			0.01763	0.392293
Vapor Phase		113.687
Molar Enthalpy	J/kmol	1.58072e-07				-2.86689e+08
Mass Enthalpy	J/kg					-8.56976e+06
Molar Entropy	J/kmol-K	0.000431297				-17224.1
Mass Entropy	J/kg-K					-514.868
Molar Density	kmol/cum					0.0371548
Mass Density	kg/cum	-2.88077e+08	-2.83718e+08	-6.04276e+08		1.24296
Enthalpy Flow	Watt	-1.51851e+07	-1.5207e+07	-6.02956e+06		-1.16074
Average MW		-167180	-156671	1.03038e+06		33.4535
Mole Flows	kmol/hr	-8812.41	-8397.41	10281.3		1.45756e-05
Mole Fractions		52.5612	51.5819	5.70723
Mass Flows	kg/day	997.138	962.364	571.973		0.0117025
Mass Fractions		-42.2019	-41.5588	-0.000798321
Liquid Phase		18.971	18.657	100.219
Molar Enthalpy	J/kmol	0.000527383	0.000527326	4.75603e-09	-2.26448e+08
Mass Enthalpy	J/kg				-1.09269e+07
Molar Entropy	J/kmol-K	0.24012	0.23612	1.14395e-05	7.78608e+37
Mass Entropy	J/kg-K				3.75704e+36
Molar Density	kmol/cum				34.0327
Mass Density	kg/cum				705.293
Enthalpy Flow	Watt				-37.7411
Average MW					20.724
Mole Flows	kmol/hr				0.000599997
Mole Fractions
Mass Flows	kg/day				0.298424
Mass Fractions

## Sheet: Soluble Nitrogen
	Units	INPUT	LIQUID	NUTRIENT	S1	S2	Formula	Molecular Mass	Nitrogen mass fraction	Nitrogen Mol Flow	soluble										Molar Mass
Description
From			B1		B4	B4
To		B2	B4	B2
Stream Class		CONVEN	CONVEN	CONVEN	CONVEN	CONVEN
Maximum Relative Error
Cost Flow	$/sec
MIXED Substream
Phase			Liquid Phase	Liquid Phase	Liquid Phase	Vapor Phase
Temperature	K	296.15	328.15	296.15	328	328
Pressure	N/sqm	101325	101325	101325	101325	101325
Molar Vapor Fraction		0.000299639	0	0	0	1
Molar Liquid Fraction		0.9997	1	1	1	0
Molar Solid Fraction		0	0	0	0	0
Mass Vapor Fraction		0.00179295	0	0	0	1
Mass Liquid Fraction		0.998207	1	1	1	1.44329e-15
Mass Solid Fraction		0	0	0	0	0
Molar Enthalpy	J/kmol	-2.8806e+08	-2.83718e+08	-6.04276e+08	-4.15427e+10	-2.10227e+08
Mass Enthalpy	J/kg	-1.51615e+07	-1.5207e+07	-6.02956e+06	-2.1962e+09	-7.74176e+06
Molar Entropy	J/kmol-K	-167359	-156671	1.03038e+06		-39940.2
Mass Entropy	J/kg-K	-8808.66	-8397.41	10281.3		-1470.82
Molar Density	kmol/cum	38.021	51.5819	5.70723	50.2494	0.0371548
Mass Density	kg/cum	722.375	962.364	571.973	950.501	1.00894
Enthalpy Flow	Watt	-42.2121	-41.5588	-0.000798321	-6118.1	-0.424266
Average MW		18.9994	18.657	100.219	18.9157	27.155
Mole Flows	mol/hr	0.527541	0.527326	4.75603e-06	0.66226	0.00624859	Alias	g/mol			non soluble										N	14
WATER	mol/hr	0.523448	0.521206	0	0.534726	0.000777908	H2O	18	0	0			Nitrogen								C	12
GLYCEROL	mol/hr	0	6.35264e-06	0	6.35264e-06	2.58898e-13	C3H8O3	92	0	0			Soluble flow (mol/hr)	0.000943836							H	1
OLEIC-AC	mol/hr	0	1.00723e-07	0	8.16623e-14	4.17371e-23	C18H34O2	282	0	0			Non-Soluble flow (mol/hr)	0.0215653							O	16
DEXTROSE	mol/hr	0.000556845	2.18952e-07	0	2.18952e-07	4.20247e-20	C6H12O6	180	0	0			Soluble mol frac (%)	0.142518							S	32
ACETI-AC	mol/hr	0	3.18543e-05	0	1.96672e-14	3.56576e-17	C2H4O2	60	0	0			Non-Soluble mol frac (%)	3.25633							Fe	56
PROPI-01	mol/hr	0	0.000487717	0	3.97804e-13	4.57917e-16	C3H6O2	74	0	0			Soluble concentration (mol/l)	0.0535358							Ca	40
ISOBU-01	mol/hr	0	0.000342575	0	1.90331e-10	1.78105e-14	C4H8O2	88	0	0			Non soluble concentration (mol/l)	1.22322							P	31
ISOVA-01	mol/hr	0	8.39815e-10	0	7.91568e-15	4.08163e-18	C5H10O2	102	0	0			pH	12.3417	12.8196						K	39
H+	mol/hr	0	0	0	8.02707e-15	0	H+	1	0	0				H+	OH-						Mg	24
OH-	mol/hr	0	0	0	0.00116377	0	OH-	17	0	0			Molar Flow	8.02707e-15	0.00116377
NH3	mol/hr	5.89058e-05	0.000106922	0	0.0261355	0.00110869	H3N	17	0.823529	0.0215233			Volume Flow	0.01763	0.01763
NH4+	mol/hr	0	0	0	5.59404e-15	0	NH4+	18	0.777778	4.35092e-15			Concentration	4.55307e-13	0.0660105	3.0055e-14
CO2	mol/hr	0	0.00128985	0	0.000653386	0.00088532	CO2	14	0	0
C5H7NO2	mol/hr	0	0.000168959	0	0.000168959	2.92421e-09	C5H7NO2	113	0.123894	2.0933e-05
ARGININE	mol/hr	0	3.49022e-06	0	5.41222e-14	1.92506e-22	C6H14N4O2	174	0.321839	1.74186e-14
HISTIDIN	mol/hr	0	2.84238e-22	0	0	0	C6H8N3O2	155	0.270968	0
LYSINE	mol/hr	0	5.10521e-22	0	5.26319e-12	1.86795e-20	C6H14N2O2	146	0.191781	1.00938e-12
TYROSINE	mol/hr	0	2.47354e-21	0	7.23454e-12	1.01571e-92	C9H11NO3	181	0.0773481	5.59577e-13
TRYPTOPH	mol/hr	0	2.5256e-23	0	5.25841e-12	7.38269e-93	C11H12N2O2	204	0.137255	7.21743e-13
PHENYLAL	mol/hr	0	2.79235e-06	0	4.30028e-11	4.05373e-19	C9H11NO2	165	0.0848485	3.64872e-12
CYSTEINE	mol/hr	0	5.19688e-06	0	5.19688e-06	4.57649e-16	C3H6NO2S	121	0.115702	6.01292e-07
METHIONI	mol/hr	0	1.06268e-20	0	5.22655e-12	7.33796e-93	C5H11NO2S	149	0.0939597	4.91085e-13
THREONIN	mol/hr	0	3.64534e-06	0	5.30331e-12	7.44573e-93	C4H9NO3	119	0.117647	6.23919e-13
SERINE	mol/hr	0	1.33412e-05	0	2.11283e-14	2.96636e-95	C3H7NO3	105	0.133333	2.8171e-15
LEUCINE	mol/hr	0	5.42957e-06	0	5.42957e-06	7.623e-87	C6H13NO2	131	0.10687	5.8026e-07
ISOLEUCI	mol/hr	0	3.56801e-06	0	9.67479e-14	1.35832e-94	C6H13NO2	131	0.10687	1.03395e-14
VALINE	mol/hr	0	5.73984e-06	0	2.08799e-14	2.93149e-95	C5H11NO2	117	0.119658	2.49845e-15
GLUTAMIC	mol/hr	0	5.73947e-06	0	9.95687e-14	5.69477e-22	C5H9NO4	147	0.0952381	9.48273e-15
ASPARTIC	mol/hr	0	3.72314e-06	0	2.62913e-11	3.69124e-92	C4H7NO4	133	0.105263	2.76751e-12
GLYCINE	mol/hr	0	1.93901e-05	0	1.93901e-05	1.70712e-15	C2H5NO2	75	0.186667	3.61948e-06
ALANINE	mol/hr	0	3.64557e-06	0	3.64557e-06	5.1183e-87	C3H7NO2	89	0.157303	5.73461e-07
PROLINE	mol/hr	0	8.60975e-06	0	1.18751e-13	1.04575e-23	C5H9NO2	115	0.121739	1.44567e-14
HYDROGEN	mol/hr	0	6.44532e-08	0	7.56428e-08	1.02139e-05	H2	2	0	0
METHANE	mol/hr	0	0.000578623	0	0.000664276	0.00342711	CH4	16	0	0
INDOLE	mol/hr	0	6.78531e-23	0	0	0	C8H7N	117	0.837607	0
FROMAMID	mol/hr	0	3.5663e-22	0	0	0	CH3NO	45	0.311111	0
H2S	mol/hr	0	5.57738e-05	0	2.48975e-10	7.20634e-11	H2S	34	0	0
CH4S	mol/hr	0	1.71518e-21	0	0	0	CH4S	48	0	0
BENZENE	mol/hr	0	2.00614e-11	0	1.2312e-10	5.53319e-11	C6H6	78	0	0
PHENOL	mol/hr	0	3.33232e-19	0	0	0	C6H6O	94	0	0
H2CO3	mol/hr	0	0	0	7.71731e-13	7.32635e-20	H2CO3	62	0	0
HCO3-	mol/hr	0	0	0	0.0171247	0	HCO3-	61	0	0
CO3-2	mol/hr	0	0	0	0.0071455	0	CO3--	60	0	0
HS-	mol/hr	0	0	0	0.00329493	0	HS-	33	0	0
CELLULOS	mol/hr	0.00136117	0.000408352	0	0.000408352	5.73317e-85	C6H10O5	162	0	0
HEMECELL	mol/hr	0.000759331	0.000303732	0	0.000303732	7.64687e-13	C5H8O4	132	0	0
GLUCOSE	mol/hr	0	0	0	0	0	C6H12O6	180	0	0
TRIOLEIN	mol/hr	4.53207e-06	4.53207e-07	0	4.53207e-07	3.55431e-25	C57H104O6	884	0	0
TRIPALM	mol/hr	4.97567e-06	4.97567e-07	0	4.97567e-07	3.62387e-24	C51H98O6	806	0	0
PALM	mol/hr	0	1.48414e-07	0	1.48414e-07	1.40588e-15	C16H34O	242	0	0
SN-1--01	mol/hr	0	0	0	0	0	C37H70O5	594	0	0
SN-1--02	mol/hr	6.77082e-06	6.77082e-07	0	6.77082e-07	4.80676e-21	C37H68O5	592	0	0
XYLOSE	mol/hr	0	7.59331e-05	0	7.59331e-05	8.00431e-15	C5H10O5	150	0	0
FURFURAL	mol/hr	0	0	0	0	0	C5H4O2	96	0	0
LINOLEIC	mol/hr	0	4.97097e-08	0	4.97097e-08	3.22102e-17	C18H32O2	280	0	0
STARCH	mol/hr	0	0	0	0	0	C6H10O5	162	0	0
ETHANOL	mol/hr	0	0.00106191	0	0.00107688	1.206e-05	C2H6O	62	0	0
PROTEIN	mol/hr	8.19116e-05	7.28678e-06	0	7.97696e-06	2.142e-07	C13H25O7N3S	367	0.114441	9.12894e-07
KERATIN	mol/hr	0.000155141	2.30273e-08	0	5.06851e-05	2.68852e-05	C(4.89)H8NO(2.1)S(0.67)	116.424	0.12025	6.09489e-06
ACETATE	mol/hr	0	0	0	3.19502e-05	0	CH3COO-	59	0	0
INERT	mol/hr	0.00110352	0.00110352	0	0.00110352	1.20651e-19	INERT	x	0.83	0.00091592
C3H5O2-	mol/hr	0	0	0	0.000488691	1.35128e-07	C3H5O2-	73	0	0
C5H9O2-	mol/hr	0	0	0	1.25379e-08	6.52088e-13	C5H9O2-	101	0	0
C4H7O2-	mol/hr	0	0	0	0.000342712	4.72231e-08	C4H7O2-	87	0	0
C18H33O2	mol/hr	0	0	0	1.17494e-07	6.00954e-17	C18H33O2	281	0	0
C3H6NO3-	mol/hr	0	0	0	1.10751e-12	0	C3H6NO3-	104	0.134615	1.49088e-13
C5H10NO2	mol/hr	0	0	0	1.28201e-12	1.79991e-93	C5H10NO2-	116	0.12069	1.54725e-13
C5H8NO4-	mol/hr	0	0	0	3.7232e-06	2.12983e-14	C5H8NO4-	146	0.0958904	3.5702e-07
ISOLE-01	mol/hr	0	0	0	3.96688e-06	5.56941e-87	C6H12NO2-	130	0.107692	4.27202e-07
PROLI-01	mol/hr	0	0	0	4.26001e-06	3.75146e-16	C5H8NO2-	114	0.122807	5.23159e-07
TYROS-01	mol/hr	0	0	0	1.45216e-12	4.39569e-24	C9H10NO3-	164	0.0853659	1.23965e-13
TRYPT-01	mol/hr	0	0	0	7.46874e-13	4.96725e-24	C11H11N2O2-	203	0.137931	1.03017e-13
ARGIN-01	mol/hr	0	0	0	4.96823e-10	2.70354e-12	C6H13N4O2-	173	0.323699	1.60821e-10
LYSIN-01	mol/hr	0	0	0	5.41432e-14	1.92191e-22	C6H13N2O2-	145	0.193103	1.04552e-14
PHENY-01	mol/hr	0	0	0	6.58983e-12	6.21308e-20	C9H10NO2-	164	0.0853659	5.62546e-13
METHI-01	mol/hr	0	0	0	1.09076e-12	1.53141e-93	C5H10NO2S-	148	0.0945946	1.0318e-13
THREO-01	mol/hr	0	0	0	7.06102e-14	9.91351e-95	C4H8NO3-	118	0.118644	8.37748e-15
ASPAR-01	mol/hr	0	0	0	8.15852e-13	1.14544e-93	C4H6NO4-	132	0.106061	8.65298e-14
C4H6NO4-	mol/hr	0	0	0	8.65134e-12	1.21463e-92	C4H6NO4-	132	0.106061	9.17566e-13
C6H13N2O	mol/hr	0	0	0	1.7265e-10	6.12852e-19	C6H13N2O2-	145	0.193103	3.33393e-11
TYROS-02	mol/hr	0	0	0	1.60665e-07	4.86332e-19	C9H10NO3-	164	0.0853659	1.37153e-08
TYROS-03	mol/hr	0	0	0	1.61304e-13	4.88268e-25	C9H10NO3-	164	0.0853659	1.37699e-14
TRYPT-02	mol/hr	0	0	0	5.14031e-11	3.41867e-22	C11H11N2O2-	173	0.16185	8.31957e-12
ARGIN-02	mol/hr	0	0	0	5.16033e-07	2.80807e-09	C6H13N4O2-	173	0.323699	1.6704e-07
ARGIN-03	mol/hr	0	0	0	1.16022e-13	6.31351e-16	C6H13N4O2-	173	0.323699	3.75562e-14
PHENY-02	mol/hr	0	0	0	1.03501e-06	9.75833e-15	C9H10NO2-	164	0.0853659	8.83542e-08
METHI-02	mol/hr	0	0	0	3.73719e-11	5.24693e-92	C5H10NO2S-	148	0.0945946	3.53518e-12
THREO-02	mol/hr	0	0	0	2.66755e-07	3.74518e-88	C4H8NO3	118	0.118644	3.16489e-08
AMMON(S)	mol/hr	0	0	0	0	0	NH2COONH4	78	0.358974	0
NH4HS(S)	mol/hr	0	0	0	1.57387e-08	2.20968e-89	NH4HS	51	0.27451	4.32044e-09
SALT1	mol/hr	0	0	0	0.000197552	2.77358e-85	NH4HCO3	79	0.177215	3.50092e-05
S--	mol/hr	0	0	0	0	0	S-2	32	0	0
NH2COO	mol/hr	0	0	0	2.77389e-15	0	NH2COO-	230	0.0608696	1.68846e-16
H3PO4	mol/hr	0	0	0	2.07128e-14	4.05294e-30	H3PO4	98	0	0
H2PO4-	mol/hr	0	0	0	3.37566e-06	0	H2PO4-	97	0	0
HPO4--	mol/hr	0	0	0	8.97405e-10	0	HPO4-2	96	0	0
PO4---	mol/hr	0	0	0	4.03311e-06	0	PO4-3	95	0	0
DIAMM-01	mol/hr	0	0	0	0	0	(NH4)2HPO4	132	0.106061	0
SALT3	mol/hr	0	0	0	0	0	NH6PO4	115	0.243478	0
K+	mol/hr	0	0	0	3.75789e-10	0	K+	39	0	0
KH2PO4	mol/hr	0	1.58534e-06	1.58534e-06	0.0104421	1.46605e-83	KH2PO4	136	0	0
K2HPO4	mol/hr	0	0	0	0.00031258	4.38855e-85	K2HPO4	270	0	0
K2CO3	mol/hr	0	0	0	0	0	K2CO3	138	0	0
KHCO3	mol/hr	0	0	0	0	0	KHCO3	100	0	0
K3PO4	mol/hr	0	0	0	0	0	K3PO4	249	0	0
MG(OH)2	mol/hr	0	7.92671e-07	7.92671e-07	7.29526e-05	1.02424e-85	MG(OH)2	58	0	0
MG++	mol/hr	0	0	0	0.00889245	0	MG+2	24	0	0
STRUVITE	mol/hr	0	0	0	0	0	NH4MgPO4.6H2O	245	0.114286	0
FE+++	mol/hr	0	0	0	0	0	FE+3	56	0	0
FE(OH)2	mol/hr	0	7.92671e-07	7.92671e-07	9.55588e-05	1.34162e-85	FE(OH)2	90	0	0
FE++	mol/hr	0	0	0	0.00947431	0	FE+2	56	0	0
FE(OH)3	mol/hr	0	7.92671e-07	7.92671e-07	7.90778e-07	1.11024e-87	FE(OH)3	107	0	0
FES	mol/hr	0	0	0	0	0	FES	88	0	0
FECO3	mol/hr	0	0	0	4.72066e-20	1.87714e-96	FECO3	116	0	0
CA(OH)2	mol/hr	0	7.92671e-07	7.92671e-07	5.9927e-05	8.41362e-86	CA(OH)2	74	0	0
CA++	mol/hr	0	0	0	0.00825062	0	CA+2	40	0	0
CACO3	mol/hr	0	0	0	0	0	CACO3	100	0	0
HCL	mol/hr				2.84722e-09	2.40244e-09
CL-	mol/hr	0.992241	0.988393	0	0.0294301	0
Mole Fractions		0	1.20469e-05	0
WATER		0	1.91008e-07	0	0.807426	0.124493
GLYCEROL		0.00105555	4.15211e-07	0	9.59237e-06	4.14331e-11
OLEIC-AC		0	6.04073e-05	0	1.23309e-13	6.67944e-21
DEXTROSE		0	0.000924887	0	3.30614e-07	6.72548e-18
ACETI-AC		0	0.000649644	0	2.9697e-14	5.7065e-15
PROPI-01		0	1.59259e-09	0	6.00677e-13	7.32833e-14
ISOBU-01		0	0	0	2.87396e-10	2.85032e-12
ISOVA-01		0	0	0	1.19525e-14	6.53208e-16
H+		0.000111661	0.000202763	0	1.21207e-14	0
OH-		0	0	0	0.00175727	0
NH3		0	0.00244602	0	0.0394641	0.17743
NH4+		0	0.000320406	0	8.4469e-15	0
CO2		0	6.6187e-06	0	0.000986601	0.141683
C5H7NO2		0	5.39017e-22	0	0.000255125	4.6798e-07
ARGININE		0	9.68131e-22	0	8.17236e-14	3.08079e-20
HISTIDIN		0	4.69072e-21	0	0	0
LYSINE		0	4.78945e-23	0	7.94732e-12	2.98939e-18
TYROSINE		0	5.2953e-06	0	1.0924e-11	1.62551e-90
TRYPTOPH		0	9.85514e-06	0	7.9401e-12	1.1815e-90
PHENYLAL		0	2.01522e-20	0	6.49334e-11	6.48744e-17
CYSTEINE		0	6.91287e-06	0	7.84719e-06	7.32404e-14
METHIONI		0	2.52998e-05	0	7.89199e-12	1.17434e-90
THREONIN		0	1.02964e-05	0	8.00791e-12	1.19159e-90
SERINE		0	6.76622e-06	0	3.19033e-14	4.74725e-93
LEUCINE		0	1.08848e-05	0	8.19856e-06	1.21996e-84
ISOLEUCI		0	1.08841e-05	0	1.46087e-13	2.1738e-92
VALINE		0	7.0604e-06	0	3.15283e-14	4.69145e-93
GLUTAMIC		0	3.67706e-05	0	1.50347e-13	9.11369e-20
ASPARTIC		0	6.91331e-06	0	3.96994e-11	5.90732e-90
GLYCINE		0	1.63272e-05	0	2.92787e-05	2.732e-13
ALANINE		0	1.22226e-07	0	5.50475e-06	8.19113e-85
PROLINE		0	0.00109728	0	1.79312e-13	1.67358e-21
HYDROGEN		0	1.28674e-22	0	1.14219e-07	0.00163459
METHANE		0	6.76299e-22	0	0.00100304	0.548461
INDOLE		0	0.000105767	0	0	0
FROMAMID		0	3.2526e-21	0	0	0
H2S		0	3.80436e-11	0	3.75948e-10	1.15328e-08
CH4S		0	6.31928e-19	0	0	0
BENZENE		0	0	0	1.85909e-10	8.85511e-09
PHENOL		0	0	0	0	0
H2CO3		0	0	0	1.1653e-12	1.17248e-17
HCO3-		0	0	0	0.025858	0
CO3-2		0.00258022	0.000774381	0	0.0107896	0
HS-		0.00143938	0.000575985	0	0.00497529	0
CELLULOS		0	0	0	0.000616603	9.17514e-83
HEMECELL		8.59094e-06	8.59444e-07	0	0.00045863	1.22378e-10
GLUCOSE		9.4318e-06	9.43565e-07	0	0	0
TRIOLEIN		0	2.81445e-07	0	6.84335e-07	5.68818e-23
TRIPALM		0	0	0	7.51317e-07	5.79951e-22
PALM		1.28347e-05	1.28399e-06	0	2.24102e-07	2.24992e-13
SN-1--01		0	0.000143996	0	0	0
SN-1--02		0	0	0	1.02238e-06	7.69255e-19
XYLOSE		0	9.42674e-08	0	0.000114658	1.28098e-12
FURFURAL		0	0	0	0	0
LINOLEIC		0	0.00201375	0	7.50608e-08	5.15479e-15
STARCH		0.00015527	1.38183e-05	0	0	0
ETHANOL		0.000294082	4.36679e-08	0	0.00162607	0.00193004
PROTEIN		0	0	0	1.20451e-05	3.42798e-05
KERATIN		0.00209181	0.00209267	0	7.65336e-05	0.0043026
ACETATE		0	0	0	4.82443e-05	0
INERT		0	0	0	0.00166629	1.93086e-17
C3H5O2-		0	0	0	0.000737914	2.16254e-05
C5H9O2-		0	0	0	1.8932e-08	1.04358e-10
C4H7O2-		0	0	0	0.000517489	7.55741e-06
C18H33O2		0	0	0	1.77414e-07	9.61744e-15
C3H6NO3-		0	0	0	1.67232e-12	0
C5H10NO2		0	0	0	1.93581e-12	2.88051e-91
C5H8NO4-		0	0	0	5.62197e-06	3.40849e-12
ISOLE-01		0	0	0	5.98992e-06	8.91307e-85
PROLI-01		0	0	0	6.43254e-06	6.0037e-14
TYROS-01		0	0	0	2.19274e-12	7.03469e-22
TRYPT-01		0	0	0	1.12777e-12	7.94939e-22
ARGIN-01		0	0	0	7.50193e-10	4.32664e-10
LYSIN-01		0	0	0	8.17552e-14	3.07575e-20
PHENY-01		0	0	0	9.95052e-12	9.94318e-18
METHI-01		0	0	0	1.64703e-12	2.45081e-91
THREO-01		0	0	0	1.0662e-13	1.58652e-92
ASPAR-01		0	0	0	1.23192e-12	1.83312e-91
C4H6NO4-		0	0	0	1.30634e-11	1.94385e-90
C6H13N2O		0	0	0	2.60698e-10	9.80785e-17
TYROS-02		0	0	0	2.42601e-07	7.78307e-17
TYROS-03		0	0	0	2.43567e-13	7.81405e-23
TRYPT-02		0	0	0	7.76177e-11	5.47111e-20
ARGIN-02		0	0	0	7.79201e-07	4.49393e-07
ARGIN-03		0	0	0	1.75191e-13	1.01039e-13
PHENY-02		0	0	0	1.56284e-06	1.56169e-12
METHI-02		0	0	0	5.64309e-11	8.39699e-90
THREO-02		0	0	0	4.02795e-07	5.99364e-86
AMMON(S)		0	0	0	0	0
NH4HS(S)		0	0	0	2.37652e-08	3.53629e-87
SALT1		0	0	0	0.0002983	4.43874e-83
S--		0	0	0	0	0
NH2COO		0	0	0	4.18852e-15	0
H3PO4		0	0	0	3.12759e-14	6.48618e-28
H2PO4-		0	0	0	5.09719e-06	0
HPO4--		0	0	0	1.35507e-09	0
PO4---		0	0	0	6.08992e-06	0
DIAMM-01		0	0	0	0	0
SALT3		0	3.00638e-06	0.333333	0	0
K+		0	0	0	5.67434e-10	0
KH2PO4		0	0	0	0.0157674	2.3462e-81
K2HPO4		0	0	0	0.00047199	7.02327e-83
K2CO3		0	0	0	0	0
KHCO3		0	1.50319e-06	0.166667	0	0
K3PO4		0	0	0	0	0
MG(OH)2		0	0	0	0.000110157	1.63915e-83
MG++		0	0	0	0.0134274	0
STRUVITE		0	1.50319e-06	0.166667	0	0
FE+++		0	0	0	0	0
FE(OH)2		0	1.50319e-06	0.166667	0.000144292	2.14709e-83
FE++		0	0	0	0.014306	0
FE(OH)3		0	0	0	1.19406e-06	1.77678e-85
FES		0	1.50319e-06	0.166667	0	0
FECO3		0	0	0	7.12811e-20	3.00411e-94
CA(OH)2		0	0	0	9.04887e-05	1.34648e-83
CA++		0.240551	0.23612	1.14395e-05	0.0124583	0
CACO3		0.226322	0.225352	0	0	0
HCL		0	1.40411e-05	0	4.29926e-09	3.84478e-07
CL-		0	6.82808e-07	0	0.044439	0
Mass Flows	kg/day	0.00240768	9.46701e-07	0	0.377487	0.00313531
WATER	kg/day	0	4.59104e-05	0	0.231198	0.000336341
GLYCEROL	kg/day	0	0.000867116	0	1.40411e-05	5.72236e-13
OLEIC-AC	kg/day	0	0.000724392	0	5.53592e-13	2.82937e-22
DEXTROSE	kg/day	0	2.05855e-09	0	9.46701e-07	1.81706e-19
ACETI-AC	kg/day	0	0	0	2.83455e-14	5.13919e-17
PROPI-01	kg/day	0	0	0	7.07258e-13	8.14134e-16
ISOBU-01	kg/day	2.40768e-05	4.37027e-05	0	4.02464e-10	3.76612e-14
ISOVA-01	kg/day	0	0	0	1.94029e-14	1.00049e-17
H+	kg/day	0	0.00136239	0	1.9265e-16	0
OH-	kg/day	0	0.000458687	0	0.000475022	0
NH3	kg/day	0	1.45921e-05	0	0.0106824	0.000453158
NH4+	kg/day	0	1.05156e-21	0	2.4218e-15	0
CO2	kg/day	0	1.79119e-21	0	0.00069013	0.000935106
C5H7NO2	kg/day	0	1.07564e-20	0	0.000458688	7.93861e-09
ARGININE	kg/day	0	1.23792e-22	0	2.26278e-13	8.04842e-22
HISTIDIN	kg/day	0	1.10706e-05	0	0	0
LYSINE	kg/day	0	1.4986e-05	0	1.84661e-11	6.55378e-20
TYROSINE	kg/day	0	3.8056e-20	0	3.146e-11	4.41692e-92
TRYPTOPH	kg/day	0	1.04216e-05	0	2.5774e-11	3.61862e-92
PHENYLAL	kg/day	0	3.36499e-05	0	1.70489e-10	1.60715e-18
CYSTEINE	kg/day	0	1.70934e-05	0	1.4986e-05	1.3197e-15
METHIONI	kg/day	0	1.12328e-05	0	1.8717e-11	2.62782e-92
THREONIN	kg/day	0	1.61378e-05	0	1.51616e-11	2.12865e-92
SERINE	kg/day	0	2.02669e-05	0	5.32906e-14	7.48189e-95
LEUCINE	kg/day	0	1.18935e-05	0	1.70934e-05	2.39987e-86
ISOLEUCI	kg/day	0	3.49335e-05	0	3.04581e-13	4.27625e-94
VALINE	kg/day	0	7.79517e-06	0	5.87049e-14	8.24203e-95
GLUTAMIC	kg/day	0	2.37902e-05	0	3.51591e-13	2.0109e-21
ASPARTIC	kg/day	0	3.11832e-09	0	8.39874e-11	1.17917e-91
GLYCINE	kg/day	0	0.000222785	0	3.49335e-05	3.07556e-15
ALANINE	kg/day	0	1.90776e-22	0	7.79517e-06	1.09443e-86
PROLINE	kg/day	0	3.85511e-22	0	3.2813e-13	2.88958e-23
HYDROGEN	kg/day	0	4.5621e-05	0	3.65969e-09	4.9416e-07
METHANE	kg/day	0	1.98036e-21	0	0.000255764	0.00131953
INDOLE	kg/day	0	3.76097e-11	0	0	0
FROMAMID	kg/day	0	7.52676e-19	0	0	0
H2S	kg/day	0	0	0	2.03653e-10	5.89454e-11
CH4S	kg/day	0	0	0	0	0
BENZENE	kg/day	0	0	0	2.30816e-10	1.03732e-10
PHENOL	kg/day	0	0	0	0	0
H2CO3	kg/day	0.00529689	0.00158907	0	1.1488e-12	1.0906e-19
HCO3-	kg/day	0.00240768	0.000963071	0	0.0250776	0
CO3-2	kg/day	0	0	0	0.0102911	0
HS-	kg/day	9.63071e-05	9.63071e-06	0	0.00261543	0
CELLULOS	kg/day	9.63071e-05	9.63071e-06	0	0.00158907	2.23101e-84
HEMECELL	kg/day	0	9.12369e-07	0	0.000963071	2.42466e-12
GLUCOSE	kg/day	0	0	0	0	0
TRIOLEIN	kg/day	9.63071e-05	9.63071e-06	0	9.63071e-06	7.55295e-24
TRIPALM	kg/day	0	0.000273599	0	9.63071e-06	7.01423e-23
PALM	kg/day	0	0	0	9.12369e-07	8.64263e-15
SN-1--01	kg/day	0	3.34587e-07	0	0	0
SN-1--02	kg/day	0	0	0	9.63071e-06	6.83706e-20
XYLOSE	kg/day	0	0.0011741	0	0.000273599	2.88408e-14
FURFURAL	kg/day	0.000722303	6.42554e-05	0	0	0
LINOLEIC	kg/day	0.000433382	6.43261e-08	0	3.34587e-07	2.16801e-16
STARCH	kg/day	0	0	0	0	0
ETHANOL	kg/day	0.00264844	0.00264844	0	0.00119066	1.33342e-05
PROTEIN	kg/day	0	0	0	7.03415e-05	1.88884e-06
KERATIN	kg/day	0	0	0	0.000141588	7.51032e-05
ACETATE	kg/day	0	0	0	4.52758e-05	0
INERT	kg/day	0	0	0	0.00264844	2.89563e-19
C3H5O2-	kg/day	0	0	0	0.000857025	2.36977e-07
C5H9O2-	kg/day	0	0	0	3.04296e-08	1.58262e-12
C4H7O2-	kg/day	0	0	0	0.000716392	9.87133e-08
C18H33O2	kg/day	0	0	0	7.96498e-07	4.07389e-16
C3H6NO3-	kg/day	0	0	0	2.76664e-12	0
C5H10NO2	kg/day	0	0	0	3.57342e-12	5.017e-93
C5H8NO4-	kg/day	0	0	0	1.30571e-05	7.46919e-14
ISOLE-01	kg/day	0	0	0	1.23925e-05	1.73989e-86
PROLI-01	kg/day	0	0	0	1.16681e-05	1.02752e-15
TYROS-01	kg/day	0	0	0	6.27973e-12	1.90087e-23
TRYPT-01	kg/day	0	0	0	3.64273e-12	2.42267e-23
ARGIN-01	kg/day	0	0	0	2.06513e-09	1.12377e-11
LYSIN-01	kg/day	0	0	0	1.88654e-13	6.69662e-22
PHENY-01	kg/day	0	0	0	2.59667e-11	2.44821e-19
METHI-01	kg/day	0	0	0	3.87978e-12	5.44713e-93
THREO-01	kg/day	0	0	0	2.00159e-13	2.81018e-94
ASPAR-01	kg/day	0	0	0	2.5865e-12	3.63139e-93
C4H6NO4-	kg/day	0	0	0	2.76367e-11	3.88013e-92
C6H13N2O	kg/day	0	0	0	6.0575e-10	2.15022e-18
TYROS-02	kg/day	0	0	0	6.98665e-07	2.11486e-18
TYROS-03	kg/day	0	0	0	7.01447e-13	2.12328e-24
TRYPT-02	kg/day	0	0	0	2.51951e-10	1.67566e-21
ARGIN-02	kg/day	0	0	0	2.15747e-06	1.17402e-08
ARGIN-03	kg/day	0	0	0	4.85073e-13	2.6396e-15
PHENY-02	kg/day	0	0	0	4.10339e-06	3.86879e-14
METHI-02	kg/day	0	0	0	1.33834e-10	1.879e-91
THREO-02	kg/day	0	0	0	7.62623e-07	1.07071e-87
AMMON(S)	kg/day	0	0	0	0	0
NH4HS(S)	kg/day	0	0	0	1.93067e-08	2.71062e-89
SALT1	kg/day	0	0	0	0.000374822	5.26242e-85
S--	kg/day	0	0	0	0	0
NH2COO	kg/day	0	0	0	3.9966e-15	0
H3PO4	kg/day	0	0	0	4.8714e-14	9.53205e-30
H2PO4-	kg/day	0	0	0	7.85755e-06	0
HPO4--	kg/day	0	0	0	2.0672e-09	0
PO4---	kg/day	0	5.17781e-06	5.17781e-06	9.19288e-06	0
DIAMM-01	kg/day	0	0	0	0	0
SALT3	kg/day	0	0	0	0	0
K+	kg/day	0	0	0	3.5262e-10	0
KH2PO4	kg/day	0	0	0	0.0341044	4.78818e-83
K2HPO4	kg/day	0	1.10948e-06	1.10948e-06	0.00130665	1.83451e-84
K2CO3	kg/day	0	0	0	0	0
KHCO3	kg/day	0	0	0	0	0
K3PO4	kg/day	0	0	0	0	0
MG(OH)2	kg/day	0	1.70954e-06	1.70954e-06	0.00010211	1.4336e-85
MG++	kg/day	0	0	0	0.00518691	0
STRUVITE	kg/day	0	2.03309e-06	2.03309e-06	0	0
FE+++	kg/day	0	0	0	0	0
FE(OH)2	kg/day	0	0	0	0.00020609	2.89346e-85
FE++	kg/day	0	1.40955e-06	1.40955e-06	0.0126984	0
FE(OH)3	kg/day	0	0	0	2.02823e-06	2.84759e-87
FES	kg/day	0	0	0	0	0
FECO3	kg/day				1.3126e-19	5.21948e-96
CA(OH)2	kg/day	0.940847	0.954395	0	0.000106564	1.49613e-85
CA++	kg/day	0	5.94657e-05	0	0.00793582	0
CACO3	kg/day	0	2.89178e-06	0	0	0
HCL	kg/day	0.010009	4.0094e-06	0	2.49148e-09	2.10227e-09
CL-	kg/day	0	0.000194437	0	0.0250415	0
Mass Fractions		0	0.00367235	0
WATER		0	0.00306789	0	0.0233307	0.168177
GLYCEROL		0	8.71823e-09	0
OLEIC-AC		0	0	0		-1.35213e+08
DEXTROSE		0	0	0		-6.46743e+06
ACETI-AC		0.00010009	0.000185087	0		-56359.8
PROPI-01		0	0	0		-2695.76
ISOBU-01		0	0.00576989	0		0.0371548
ISOVA-01		0	0.0019426	0		0.776789
H+		0	6.17996e-05	0		-0.234692
OH-		0	4.45347e-21	0		20.9068
NH3		0	7.58591e-21	0		6.24859e-06
NH4+		0	4.55548e-20	0
CO2		0	5.24276e-22	0		0.00313531
C5H7NO2		0	4.68853e-05	0
ARGININE		0	6.34676e-05	0
HISTIDIN		0	1.61172e-19	0	-4.59416e+07
LYSINE		0	4.41369e-05	0	-1.93439e+06
TYROSINE		0	0.000142511	0	1.06482e+38
TRYPTOPH		0	7.23925e-05	0	4.48346e+36
PHENYLAL		0	4.75722e-05	0	28.3857
CYSTEINE		0	6.83458e-05	0	674.159
METHIONI		0	8.58328e-05	0	-8.45146
THREONIN		0	5.03707e-05	0	23.7499
SERINE		0	0.000147948	0	0.00066226
LEUCINE		0	3.30136e-05	0
ISOLEUCI		0	0.000100755	0	0.377487
VALINE		0	1.32065e-08	0	3.31059e-14	2.84318e-93
GLUTAMIC		0	0.000943523	0	0.0011343	3.96845e-10
ASPARTIC		0	8.07962e-22	0	1.81777e-12	1.56112e-91
GLYCINE		0	1.63269e-21	0	0.00011706	6.3042e-13
ALANINE		0	0.000193211	0	2.61212e-05	2.24332e-84
PROLINE		0	8.3871e-21	0	0.00109433	5.89489e-12
HYDROGEN		0	1.59282e-10	0	5.13444e-09	4.24086e-05
METHANE		0	3.18768e-18	0	0.000394655	0.124547
INDOLE		0	0	0	0	0
FROMAMID		0	0	0	0	0
H2S		0	0	0	6.53389e-10	1.12682e-08
CH4S		0	0	0	0	0
BENZENE		0.0220198	0.0067299	0	2.68663e-10	2.17367e-08
PHENOL		0.010009	0.00407873	0	0	0
H2CO3		0	0	0	4.55592e-10	2.64568e-15
HCO3-		0.00040036	4.07873e-05	0	1.02729e-08	0
CO3-2		0.00040036	4.07873e-05	0	4.86172e-18	0
HS-		0	3.864e-06	0	0.00186256	0
CELLULOS		0	0	0	0.00532487	4.57306e-82
HEMECELL		0.00040036	4.07873e-05	0	0.00322719	4.96999e-10
GLUCOSE		0	0.00115873	0	0	0
TRIOLEIN		0	0	0	3.22719e-05	1.54818e-21
TRIPALM		0	1.41702e-06	0	3.22719e-05	1.43775e-20
PALM		0	0	0	3.0573e-06	1.77154e-12
SN-1--01		0	0.00497248	0	0	0
SN-1--02		0.0030027	0.00027213	0	3.22719e-05	1.40144e-17
XYLOSE		0.00180162	2.72429e-07	0	0.000916813	5.91169e-12
FURFURAL		0	0	0	0	0
LINOLEIC		0.0110099	0.0112165	0	1.12118e-06	4.44391e-14
STARCH		0	0	0	0	0
ETHANOL		0	0	0	0.00388729	0.00375417
PROTEIN		0	0	0	0.000224068	0.000458276
KERATIN		0	0	0	6.72902e-05	0.0168007
ACETATE		0	0	0	0.000135385	0
INERT		0	0	0	0.00887478	3.45319e-16
C3H5O2-		0	0	0	0.00235915	3.99031e-05
C5H9O2-		0	0	0	2.5532e-05	8.12276e-08
C4H7O2-		0	0	0	0.00127168	1.07187e-05
C18H33O2		0	0	0	0.000232706	7.28066e-12
C3H6NO3-		0	0	0	6.04559e-06	0
C5H10NO2		0	0	0	0	0
C5H8NO4-		0	0	0	1.92427e-08	6.73336e-15
ISOLE-01		0	0	0	2.09143e-08	1.79615e-87
PROLI-01		0	0	0	1.86215e-08	1.0031e-16
TYROS-01		0	0	0	2.21037e-12	4.09275e-22
TRYPT-01		0	0	0	1.08586e-19	8.17251e-24
ARGIN-01		0	0	0	2.05634e-14	6.84486e-15
LYSIN-01		0	0	0	1.65318e-16	3.11616e-21
PHENY-01		0	0	0	8.011e-12	4.62017e-18
METHI-01		0	0	0	6.48191e-20	1.25819e-93
THREO-01		0	0	0	2.63963e-20	1.00271e-93
ASPAR-01		0	0	0	1.83255e-17	1.12142e-93
C4H6NO4-		0	0	0	4.01257e-12	3.44604e-91
C6H13N2O		0	0	0	5.98909e-08	1.30043e-14
TYROS-02		0	0	0	1.77467e-05	3.28601e-15
TYROS-03		0	0	0	2.44311e-13	4.5237e-23
TRYPT-02		0	0	0	2.01882e-14	8.21304e-24
ARGIN-02		0	0	0	2.84522e-06	9.47077e-07
ARGIN-03		0	0	0	2.17011e-16	1.34435e-16
PHENY-02		0	0	0	0.000157817	9.10176e-11
METHI-02		0	0	0	1.47499e-14	1.26674e-93
THREO-02		0	0	0	1.17752e-14	1.01127e-93
AMMON(S)		0	0	0	0	0
NH4HS(S)		0	0	0	0.000623556	5.35518e-83
SALT1		0	0	0	0	0
S--		0	0	0	0	0
NH2COO		0	0	0	0	0
H3PO4		0	0	0	0.0050514	6.0462e-17
H2PO4-		0	2.19287e-05	0.452627	0.025316	0
HPO4--		0	0	0	5.62632e-09	0
PO4---		0	0	0	1.45915e-20	0
DIAMM-01		0	0	0	0	0
SALT3		0	0	0	0	0
K+		0	4.69879e-06	0.096987	0.0114253	0
KH2PO4		0	0	0	1.82906e-17	1.15529e-93
K2HPO4		0	0	0	0	0
K2CO3		0	0	0	0	0
KHCO3		0	7.24012e-06	0.149442	0	0
K3PO4		0	0	0	0	0
MG(OH)2		0	8.61039e-06	0.177726	0	0
MG++		0	0	0	0.00583517	0
STRUVITE		0	0	0	0	0
FE+++		0	5.96961e-06	0.123218	0	0
FE(OH)2		0	0	0	0	0
FE++		0	0	0	0.0180886	0
FE(OH)3		0.013875	0.0102231	8.33333e-07	6.79649e-06	5.83691e-85
FES					0	0
FECO3		-2.31039e+08			0	0
CA(OH)2		-2.03224e+06			0	0
CA++		-764281			0.011387	0
CACO3		-6722.69			0	0
HCL		0.0411507			7.0539e-10	3.64082e-08
CL-		4.6783			0.091845	0
Volume Flow	l/hr	-0.0101447			0.01763	0.392293
Vapor Phase		113.687
Molar Enthalpy	J/kmol	1.58072e-07				-2.86689e+08
Mass Enthalpy	J/kg					-8.56976e+06
Molar Entropy	J/kmol-K	0.000431297				-17224.1
Mass Entropy	J/kg-K					-514.868
Molar Density	kmol/cum					0.0371548
Mass Density	kg/cum	-2.88077e+08	-2.83718e+08	-6.04276e+08		1.24296
Enthalpy Flow	Watt	-1.51851e+07	-1.5207e+07	-6.02956e+06		-1.16074
Average MW		-167180	-156671	1.03038e+06		33.4535
Mole Flows	kmol/hr	-8812.41	-8397.41	10281.3		1.45756e-05
Mole Fractions		52.5612	51.5819	5.70723
Mass Flows	kg/day	997.138	962.364	571.973		0.0117025
Mass Fractions		-42.2019	-41.5588	-0.000798321
Liquid Phase		18.971	18.657	100.219
Molar Enthalpy	J/kmol	0.000527383	0.000527326	4.75603e-09	-2.26448e+08
Mass Enthalpy	J/kg				-1.09269e+07
Molar Entropy	J/kmol-K	0.24012	0.23612	1.14395e-05	7.78608e+37
Mass Entropy	J/kg-K				3.75704e+36
Molar Density	kmol/cum				34.0327
Mass Density	kg/cum				705.293
Enthalpy Flow	Watt				-37.7411
Average MW					20.724
Mole Flows	kmol/hr				0.000599997
Mole Fractions
Mass Flows	kg/day				0.298424
Mass Fractions

## Sheet: Soluble Carbon
	Units	INPUT	LIQUID	NUTRIENT	S1	S2	Formula	Molecular Mass	Carbon molar mass fraction	Carbon Mol Flow	soluble										Molar Mass
Description
From			B1		B4	B4
To		B2	B4	B2
Stream Class		CONVEN	CONVEN	CONVEN	CONVEN	CONVEN
Maximum Relative Error
Cost Flow	$/sec
MIXED Substream
Phase			Liquid Phase	Liquid Phase	Liquid Phase	Vapor Phase
Temperature	K	296.15	328.15	296.15	328	328
Pressure	N/sqm	101325	101325	101325	101325	101325
Molar Vapor Fraction		0.000299639	0	0	0	1
Molar Liquid Fraction		0.9997	1	1	1	0
Molar Solid Fraction		0	0	0	0	0
Mass Vapor Fraction		0.00179295	0	0	0	1
Mass Liquid Fraction		0.998207	1	1	1	1.44329e-15
Mass Solid Fraction		0	0	0	0	0
Molar Enthalpy	J/kmol	-2.8806e+08	-2.83718e+08	-6.04276e+08	-4.15427e+10	-2.10227e+08
Mass Enthalpy	J/kg	-1.51615e+07	-1.5207e+07	-6.02956e+06	-2.1962e+09	-7.74176e+06
Molar Entropy	J/kmol-K	-167359	-156671	1.03038e+06		-39940.2
Mass Entropy	J/kg-K	-8808.66	-8397.41	10281.3		-1470.82
Molar Density	kmol/cum	38.021	51.5819	5.70723	50.2494	0.0371548
Mass Density	kg/cum	722.375	962.364	571.973	950.501	1.00894
Enthalpy Flow	Watt	-42.2121	-41.5588	-0.000798321	-6118.1	-0.424266
Average MW		18.9994	18.657	100.219	18.9157	27.155
Mole Flows	mol/hr	0.527541	0.527326	4.75603e-06	0.66226	0.00624859	Alias	g/mol			non soluble										N	14
WATER	mol/hr	0.523448	0.521206	0	0.534726	0.000777908	H2O	18	0	0			Carbon								C	12
GLYCEROL	mol/hr	0	6.35264e-06	0	6.35264e-06	2.58898e-13	C3H8O3	92	0.391304	1.01308e-13			Soluble flow (mol/hr)	0.00677661							H	1
OLEIC-AC	mol/hr	0	1.00723e-07	0	8.16623e-14	4.17371e-23	C18H34O2	282	0.765957	3.19688e-23			Non-Soluble flow (mol/hr)	0.000378495							O	16
DEXTROSE	mol/hr	0.000556845	2.18952e-07	0	2.18952e-07	4.20247e-20	C6H12O6	180	0.4	1.68099e-20			Soluble mol frac (%)	1.02326							S	32
ACETI-AC	mol/hr	0	3.18543e-05	0	1.96672e-14	3.56576e-17	C2H4O2	60	0.4	1.4263e-17			Non-Soluble mol frac (%)	0.057152							Fe	56
PROPI-01	mol/hr	0	0.000487717	0	3.97804e-13	4.57917e-16	C3H6O2	74	0.486486	2.2277e-16			Soluble concentration (mol/l)	0.384379							Ca	40
ISOBU-01	mol/hr	0	0.000342575	0	1.90331e-10	1.78105e-14	C4H8O2	88	0.545455	9.71481e-15			Non soluble concentration (mol/l)	0.0214688							P	31
ISOVA-01	mol/hr	0	8.39815e-10	0	7.91568e-15	4.08163e-18	C5H10O2	102	0.588235	2.40096e-18			pH	12.3417	12.8196						K	39
H+	mol/hr	0	0	0	8.02707e-15	0	H+	1	0	0				H+	OH-						Mg	24
OH-	mol/hr	0	0	0	0.00116377	0	OH-	17	0	0			Molar Flow	8.02707e-15	0.00116377
NH3	mol/hr	5.89058e-05	0.000106922	0	0.0261355	0.00110869	H3N	17	0	0			Volume Flow	0.01763	0.01763
NH4+	mol/hr	0	0	0	5.59404e-15	0	NH4+	18	0	0			Concentration	4.55307e-13	0.0660105	3.0055e-14
CO2	mol/hr	0	0.00128985	0	0.000653386	0.00088532	CO2	14	0.857143	0.000560045
C5H7NO2	mol/hr	0	0.000168959	0	0.000168959	2.92421e-09	C5H7NO2	113	0.530973	8.97129e-05
ARGININE	mol/hr	0	3.49022e-06	0	5.41222e-14	1.92506e-22	C6H14N4O2	174	0.413793	2.23954e-14
HISTIDIN	mol/hr	0	2.84238e-22	0	0	0	C6H8N3O2	155	0.464516	0
LYSINE	mol/hr	0	5.10521e-22	0	5.26319e-12	1.86795e-20	C6H14N2O2	146	0.493151	2.59554e-12
TYROSINE	mol/hr	0	2.47354e-21	0	7.23454e-12	1.01571e-92	C9H11NO3	181	0.596685	4.31674e-12
TRYPTOPH	mol/hr	0	2.5256e-23	0	5.25841e-12	7.38269e-93	C11H12N2O2	204	0.647059	3.4025e-12
PHENYLAL	mol/hr	0	2.79235e-06	0	4.30028e-11	4.05373e-19	C9H11NO2	165	0.654545	2.81473e-11
CYSTEINE	mol/hr	0	5.19688e-06	0	5.19688e-06	4.57649e-16	C3H6NO2S	121	0.297521	1.54618e-06
METHIONI	mol/hr	0	1.06268e-20	0	5.22655e-12	7.33796e-93	C5H11NO2S	149	0.402685	2.10465e-12
THREONIN	mol/hr	0	3.64534e-06	0	5.30331e-12	7.44573e-93	C4H9NO3	119	0.403361	2.13915e-12
SERINE	mol/hr	0	1.33412e-05	0	2.11283e-14	2.96636e-95	C3H7NO3	105	0.342857	7.24397e-15
LEUCINE	mol/hr	0	5.42957e-06	0	5.42957e-06	7.623e-87	C6H13NO2	131	0.549618	2.98419e-06
ISOLEUCI	mol/hr	0	3.56801e-06	0	9.67479e-14	1.35832e-94	C6H13NO2	131	0.549618	5.31744e-14
VALINE	mol/hr	0	5.73984e-06	0	2.08799e-14	2.93149e-95	C5H11NO2	117	0.512821	1.07076e-14
GLUTAMIC	mol/hr	0	5.73947e-06	0	9.95687e-14	5.69477e-22	C5H9NO4	147	0.408163	4.06403e-14
ASPARTIC	mol/hr	0	3.72314e-06	0	2.62913e-11	3.69124e-92	C4H7NO4	133	0.360902	9.48859e-12
GLYCINE	mol/hr	0	1.93901e-05	0	1.93901e-05	1.70712e-15	C2H5NO2	75	0.32	6.20483e-06
ALANINE	mol/hr	0	3.64557e-06	0	3.64557e-06	5.1183e-87	C3H7NO2	89	0.404494	1.47461e-06
PROLINE	mol/hr	0	8.60975e-06	0	1.18751e-13	1.04575e-23	C5H9NO2	115	0.521739	6.19572e-14
HYDROGEN	mol/hr	0	6.44532e-08	0	7.56428e-08	1.02139e-05	H2	2	0	0
METHANE	mol/hr	0	0.000578623	0	0.000664276	0.00342711	CH4	16	0.75	0.000498207
INDOLE	mol/hr	0	6.78531e-23	0	0	0	C8H7N	117	0.820513	0
FROMAMID	mol/hr	0	3.5663e-22	0	0	0	CH3NO	45	0.266667	0
H2S	mol/hr	0	5.57738e-05	0	2.48975e-10	7.20634e-11	H2S	34	0	0
CH4S	mol/hr	0	1.71518e-21	0	0	0	CH4S	48	0.25	0
BENZENE	mol/hr	0	2.00614e-11	0	1.2312e-10	5.53319e-11	C6H6	78	0.923077	1.13649e-10
PHENOL	mol/hr	0	3.33232e-19	0	0	0	C6H6O	94	0.765957	0
H2CO3	mol/hr	0	0	0	7.71731e-13	7.32635e-20	H2CO3	62	0.193548	1.49367e-13
HCO3-	mol/hr	0	0	0	0.0171247	0	HCO3-	61	0.196721	0.00336879
CO3-2	mol/hr	0	0	0	0.0071455	0	CO3--	60	0.2	0.0014291
HS-	mol/hr	0	0	0	0.00329493	0	HS-	33	0	0
CELLULOS	mol/hr	0.00136117	0.000408352	0	0.000408352	5.73317e-85	C6H10O5	162	0.444444	0.00018149
HEMECELL	mol/hr	0.000759331	0.000303732	0	0.000303732	7.64687e-13	C5H8O4	132	0.454545	0.00013806
GLUCOSE	mol/hr	0	0	0	0	0	C6H12O6	180	0.4	0
TRIOLEIN	mol/hr	4.53207e-06	4.53207e-07	0	4.53207e-07	3.55431e-25	C57H104O6	884	0.773756	3.50672e-07
TRIPALM	mol/hr	4.97567e-06	4.97567e-07	0	4.97567e-07	3.62387e-24	C51H98O6	806	0.759305	3.77805e-07
PALM	mol/hr	0	1.48414e-07	0	1.48414e-07	1.40588e-15	C16H34O	242	0.793388	1.1775e-07
SN-1--01	mol/hr	0	0	0	0	0	C37H70O5	594	0.747475	0
SN-1--02	mol/hr	6.77082e-06	6.77082e-07	0	6.77082e-07	4.80676e-21	C37H68O5	592	0.75	5.07812e-07
XYLOSE	mol/hr	0	7.59331e-05	0	7.59331e-05	8.00431e-15	C5H10O5	150	0.4	3.03732e-05
FURFURAL	mol/hr	0	0	0	0	0	C5H4O2	96	0.625	0
LINOLEIC	mol/hr	0	4.97097e-08	0	4.97097e-08	3.22102e-17	C18H32O2	280	0.771429	3.83475e-08
STARCH	mol/hr	0	0	0	0	0	C6H10O5	162	0.444444	0
ETHANOL	mol/hr	0	0.00106191	0	0.00107688	1.206e-05	C2H6O	62	0.387097	0.000416856
PROTEIN	mol/hr	8.19116e-05	7.28678e-06	0	7.97696e-06	2.142e-07	C13H25O7N3S	367	0.425068	3.39075e-06
KERATIN	mol/hr	0.000155141	2.30273e-08	0	5.06851e-05	2.68852e-05	C(4.89)H8NO(2.1)S(0.67)	116.424	0.50402	2.55463e-05
ACETATE	mol/hr	0	0	0	3.19502e-05	0	CH3COO-	59	0.40678	1.29967e-05
INERT	mol/hr	0.00110352	0.00110352	0	0.00110352	1.20651e-19	INERT	x	0	0
C3H5O2-	mol/hr	0	0	0	0.000488691	1.35128e-07	C3H5O2-	73	0.328767	0.000160665
C5H9O2-	mol/hr	0	0	0	1.25379e-08	6.52088e-13	C5H9O2-	101	0.594059	7.44827e-09
C4H7O2-	mol/hr	0	0	0	0.000342712	4.72231e-08	C4H7O2-	87	0.551724	0.000189083
C18H33O2	mol/hr	0	0	0	1.17494e-07	6.00954e-17	C18H33O2	281	0.768683	9.03158e-08
C3H6NO3-	mol/hr	0	0	0	1.10751e-12	0	C3H6NO3-	104	0.346154	3.83369e-13
C5H10NO2	mol/hr	0	0	0	1.28201e-12	1.79991e-93	C5H10NO2-	116	0.517241	6.63108e-13
C5H8NO4-	mol/hr	0	0	0	3.7232e-06	2.12983e-14	C5H8NO4-	146	0.410959	1.53008e-06
ISOLE-01	mol/hr	0	0	0	3.96688e-06	5.56941e-87	C6H12NO2-	130	0.553846	2.19704e-06
PROLI-01	mol/hr	0	0	0	4.26001e-06	3.75146e-16	C5H8NO2-	114	0.526316	2.24211e-06
TYROS-01	mol/hr	0	0	0	1.45216e-12	4.39569e-24	C9H10NO3-	164	0.658537	9.56301e-13
TRYPT-01	mol/hr	0	0	0	7.46874e-13	4.96725e-24	C11H11N2O2-	203	0.650246	4.85652e-13
ARGIN-01	mol/hr	0	0	0	4.96823e-10	2.70354e-12	C6H13N4O2-	173	0.416185	2.0677e-10
LYSIN-01	mol/hr	0	0	0	5.41432e-14	1.92191e-22	C6H13N2O2-	145	0.496552	2.68849e-14
PHENY-01	mol/hr	0	0	0	6.58983e-12	6.21308e-20	C9H10NO2-	164	0.658537	4.33964e-12
METHI-01	mol/hr	0	0	0	1.09076e-12	1.53141e-93	C5H10NO2S-	148	0.405405	4.42202e-13
THREO-01	mol/hr	0	0	0	7.06102e-14	9.91351e-95	C4H8NO3-	118	0.40678	2.87228e-14
ASPAR-01	mol/hr	0	0	0	8.15852e-13	1.14544e-93	C4H6NO4-	132	0.363636	2.96674e-13
C4H6NO4-	mol/hr	0	0	0	8.65134e-12	1.21463e-92	C4H6NO4-	132	0.363636	3.14594e-12
C6H13N2O	mol/hr	0	0	0	1.7265e-10	6.12852e-19	C6H13N2O2-	145	0.496552	8.57295e-11
TYROS-02	mol/hr	0	0	0	1.60665e-07	4.86332e-19	C9H10NO3-	164	0.658537	1.05804e-07
TYROS-03	mol/hr	0	0	0	1.61304e-13	4.88268e-25	C9H10NO3-	164	0.658537	1.06225e-13
TRYPT-02	mol/hr	0	0	0	5.14031e-11	3.41867e-22	C11H11N2O2-	173	0.763006	3.92208e-11
ARGIN-02	mol/hr	0	0	0	5.16033e-07	2.80807e-09	C6H13N4O2-	173	0.416185	2.14765e-07
ARGIN-03	mol/hr	0	0	0	1.16022e-13	6.31351e-16	C6H13N4O2-	173	0.416185	4.82866e-14
PHENY-02	mol/hr	0	0	0	1.03501e-06	9.75833e-15	C9H10NO2-	164	0.658537	6.81589e-07
METHI-02	mol/hr	0	0	0	3.73719e-11	5.24693e-92	C5H10NO2S-	148	0.405405	1.51508e-11
THREO-02	mol/hr	0	0	0	2.66755e-07	3.74518e-88	C4H8NO3	118	0.40678	1.0851e-07
AMMON(S)	mol/hr	0	0	0	0	0	NH2COONH4	78	0.153846	0
NH4HS(S)	mol/hr	0	0	0	1.57387e-08	2.20968e-89	NH4HS	51	0	0
SALT1	mol/hr	0	0	0	0.000197552	2.77358e-85	NH4HCO3	79	0.151899	3.00079e-05
S--	mol/hr	0	0	0	0	0	S-2	32	0	0
NH2COO	mol/hr	0	0	0	2.77389e-15	0	NH2COO-	230	0.0521739	1.44725e-16
H3PO4	mol/hr	0	0	0	2.07128e-14	4.05294e-30	H3PO4	98	0	0
H2PO4-	mol/hr	0	0	0	3.37566e-06	0	H2PO4-	97	0	0
HPO4--	mol/hr	0	0	0	8.97405e-10	0	HPO4-2	96	0	0
PO4---	mol/hr	0	0	0	4.03311e-06	0	PO4-3	95	0	0
DIAMM-01	mol/hr	0	0	0	0	0	(NH4)2HPO4	132	0	0
SALT3	mol/hr	0	0	0	0	0	NH6PO4	115	0	0
K+	mol/hr	0	0	0	3.75789e-10	0	K+	39	0	0
KH2PO4	mol/hr	0	1.58534e-06	1.58534e-06	0.0104421	1.46605e-83	KH2PO4	136	0	0
K2HPO4	mol/hr	0	0	0	0.00031258	4.38855e-85	K2HPO4	270	0	0
K2CO3	mol/hr	0	0	0	0	0	K2CO3	138	0.0869565	0
KHCO3	mol/hr	0	0	0	0	0	KHCO3	100	0.12	0
K3PO4	mol/hr	0	0	0	0	0	K3PO4	249	0	0
MG(OH)2	mol/hr	0	7.92671e-07	7.92671e-07	7.29526e-05	1.02424e-85	MG(OH)2	58	0	0
MG++	mol/hr	0	0	0	0.00889245	0	MG+2	24	0	0
STRUVITE	mol/hr	0	0	0	0	0	NH4MgPO4.6H2O	245	0	0
FE+++	mol/hr	0	0	0	0	0	FE+3	56	0	0
FE(OH)2	mol/hr	0	7.92671e-07	7.92671e-07	9.55588e-05	1.34162e-85	FE(OH)2	90	0	0
FE++	mol/hr	0	0	0	0.00947431	0	FE+2	56	0	0
FE(OH)3	mol/hr	0	7.92671e-07	7.92671e-07	7.90778e-07	1.11024e-87	FE(OH)3	107	0	0
FES	mol/hr	0	0	0	0	0	FES	88	0	0
FECO3	mol/hr	0	0	0	4.72066e-20	1.87714e-96	FECO3	116	0.103448	4.88344e-21
CA(OH)2	mol/hr	0	7.92671e-07	7.92671e-07	5.9927e-05	8.41362e-86	CA(OH)2	74	0	0
CA++	mol/hr	0	0	0	0.00825062	0	CA+2	40	0	0
CACO3	mol/hr	0	0	0	0	0	CACO3	100	0.12	0
HCL	mol/hr				2.84722e-09	2.40244e-09
CL-	mol/hr	0.992241	0.988393	0	0.0294301	0
Mole Fractions		0	1.20469e-05	0
WATER		0	1.91008e-07	0	0.807426	0.124493
GLYCEROL		0.00105555	4.15211e-07	0	9.59237e-06	4.14331e-11
OLEIC-AC		0	6.04073e-05	0	1.23309e-13	6.67944e-21
DEXTROSE		0	0.000924887	0	3.30614e-07	6.72548e-18
ACETI-AC		0	0.000649644	0	2.9697e-14	5.7065e-15
PROPI-01		0	1.59259e-09	0	6.00677e-13	7.32833e-14
ISOBU-01		0	0	0	2.87396e-10	2.85032e-12
ISOVA-01		0	0	0	1.19525e-14	6.53208e-16
H+		0.000111661	0.000202763	0	1.21207e-14	0
OH-		0	0	0	0.00175727	0
NH3		0	0.00244602	0	0.0394641	0.17743
NH4+		0	0.000320406	0	8.4469e-15	0
CO2		0	6.6187e-06	0	0.000986601	0.141683
C5H7NO2		0	5.39017e-22	0	0.000255125	4.6798e-07
ARGININE		0	9.68131e-22	0	8.17236e-14	3.08079e-20
HISTIDIN		0	4.69072e-21	0	0	0
LYSINE		0	4.78945e-23	0	7.94732e-12	2.98939e-18
TYROSINE		0	5.2953e-06	0	1.0924e-11	1.62551e-90
TRYPTOPH		0	9.85514e-06	0	7.9401e-12	1.1815e-90
PHENYLAL		0	2.01522e-20	0	6.49334e-11	6.48744e-17
CYSTEINE		0	6.91287e-06	0	7.84719e-06	7.32404e-14
METHIONI		0	2.52998e-05	0	7.89199e-12	1.17434e-90
THREONIN		0	1.02964e-05	0	8.00791e-12	1.19159e-90
SERINE		0	6.76622e-06	0	3.19033e-14	4.74725e-93
LEUCINE		0	1.08848e-05	0	8.19856e-06	1.21996e-84
ISOLEUCI		0	1.08841e-05	0	1.46087e-13	2.1738e-92
VALINE		0	7.0604e-06	0	3.15283e-14	4.69145e-93
GLUTAMIC		0	3.67706e-05	0	1.50347e-13	9.11369e-20
ASPARTIC		0	6.91331e-06	0	3.96994e-11	5.90732e-90
GLYCINE		0	1.63272e-05	0	2.92787e-05	2.732e-13
ALANINE		0	1.22226e-07	0	5.50475e-06	8.19113e-85
PROLINE		0	0.00109728	0	1.79312e-13	1.67358e-21
HYDROGEN		0	1.28674e-22	0	1.14219e-07	0.00163459
METHANE		0	6.76299e-22	0	0.00100304	0.548461
INDOLE		0	0.000105767	0	0	0
FROMAMID		0	3.2526e-21	0	0	0
H2S		0	3.80436e-11	0	3.75948e-10	1.15328e-08
CH4S		0	6.31928e-19	0	0	0
BENZENE		0	0	0	1.85909e-10	8.85511e-09
PHENOL		0	0	0	0	0
H2CO3		0	0	0	1.1653e-12	1.17248e-17
HCO3-		0	0	0	0.025858	0
CO3-2		0.00258022	0.000774381	0	0.0107896	0
HS-		0.00143938	0.000575985	0	0.00497529	0
CELLULOS		0	0	0	0.000616603	9.17514e-83
HEMECELL		8.59094e-06	8.59444e-07	0	0.00045863	1.22378e-10
GLUCOSE		9.4318e-06	9.43565e-07	0	0	0
TRIOLEIN		0	2.81445e-07	0	6.84335e-07	5.68818e-23
TRIPALM		0	0	0	7.51317e-07	5.79951e-22
PALM		1.28347e-05	1.28399e-06	0	2.24102e-07	2.24992e-13
SN-1--01		0	0.000143996	0	0	0
SN-1--02		0	0	0	1.02238e-06	7.69255e-19
XYLOSE		0	9.42674e-08	0	0.000114658	1.28098e-12
FURFURAL		0	0	0	0	0
LINOLEIC		0	0.00201375	0	7.50608e-08	5.15479e-15
STARCH		0.00015527	1.38183e-05	0	0	0
ETHANOL		0.000294082	4.36679e-08	0	0.00162607	0.00193004
PROTEIN		0	0	0	1.20451e-05	3.42798e-05
KERATIN		0.00209181	0.00209267	0	7.65336e-05	0.0043026
ACETATE		0	0	0	4.82443e-05	0
INERT		0	0	0	0.00166629	1.93086e-17
C3H5O2-		0	0	0	0.000737914	2.16254e-05
C5H9O2-		0	0	0	1.8932e-08	1.04358e-10
C4H7O2-		0	0	0	0.000517489	7.55741e-06
C18H33O2		0	0	0	1.77414e-07	9.61744e-15
C3H6NO3-		0	0	0	1.67232e-12	0
C5H10NO2		0	0	0	1.93581e-12	2.88051e-91
C5H8NO4-		0	0	0	5.62197e-06	3.40849e-12
ISOLE-01		0	0	0	5.98992e-06	8.91307e-85
PROLI-01		0	0	0	6.43254e-06	6.0037e-14
TYROS-01		0	0	0	2.19274e-12	7.03469e-22
TRYPT-01		0	0	0	1.12777e-12	7.94939e-22
ARGIN-01		0	0	0	7.50193e-10	4.32664e-10
LYSIN-01		0	0	0	8.17552e-14	3.07575e-20
PHENY-01		0	0	0	9.95052e-12	9.94318e-18
METHI-01		0	0	0	1.64703e-12	2.45081e-91
THREO-01		0	0	0	1.0662e-13	1.58652e-92
ASPAR-01		0	0	0	1.23192e-12	1.83312e-91
C4H6NO4-		0	0	0	1.30634e-11	1.94385e-90
C6H13N2O		0	0	0	2.60698e-10	9.80785e-17
TYROS-02		0	0	0	2.42601e-07	7.78307e-17
TYROS-03		0	0	0	2.43567e-13	7.81405e-23
TRYPT-02		0	0	0	7.76177e-11	5.47111e-20
ARGIN-02		0	0	0	7.79201e-07	4.49393e-07
ARGIN-03		0	0	0	1.75191e-13	1.01039e-13
PHENY-02		0	0	0	1.56284e-06	1.56169e-12
METHI-02		0	0	0	5.64309e-11	8.39699e-90
THREO-02		0	0	0	4.02795e-07	5.99364e-86
AMMON(S)		0	0	0	0	0
NH4HS(S)		0	0	0	2.37652e-08	3.53629e-87
SALT1		0	0	0	0.0002983	4.43874e-83
S--		0	0	0	0	0
NH2COO		0	0	0	4.18852e-15	0
H3PO4		0	0	0	3.12759e-14	6.48618e-28
H2PO4-		0	0	0	5.09719e-06	0
HPO4--		0	0	0	1.35507e-09	0
PO4---		0	0	0	6.08992e-06	0
DIAMM-01		0	0	0	0	0
SALT3		0	3.00638e-06	0.333333	0	0
K+		0	0	0	5.67434e-10	0
KH2PO4		0	0	0	0.0157674	2.3462e-81
K2HPO4		0	0	0	0.00047199	7.02327e-83
K2CO3		0	0	0	0	0
KHCO3		0	1.50319e-06	0.166667	0	0
K3PO4		0	0	0	0	0
MG(OH)2		0	0	0	0.000110157	1.63915e-83
MG++		0	0	0	0.0134274	0
STRUVITE		0	1.50319e-06	0.166667	0	0
FE+++		0	0	0	0	0
FE(OH)2		0	1.50319e-06	0.166667	0.000144292	2.14709e-83
FE++		0	0	0	0.014306	0
FE(OH)3		0	0	0	1.19406e-06	1.77678e-85
FES		0	1.50319e-06	0.166667	0	0
FECO3		0	0	0	7.12811e-20	3.00411e-94
CA(OH)2		0	0	0	9.04887e-05	1.34648e-83
CA++		0.240551	0.23612	1.14395e-05	0.0124583	0
CACO3		0.226322	0.225352	0	0	0
HCL		0	1.40411e-05	0	4.29926e-09	3.84478e-07
CL-		0	6.82808e-07	0	0.044439	0
Mass Flows	kg/day	0.00240768	9.46701e-07	0	0.377487	0.00313531
WATER	kg/day	0	4.59104e-05	0	0.231198	0.000336341
GLYCEROL	kg/day	0	0.000867116	0	1.40411e-05	5.72236e-13
OLEIC-AC	kg/day	0	0.000724392	0	5.53592e-13	2.82937e-22
DEXTROSE	kg/day	0	2.05855e-09	0	9.46701e-07	1.81706e-19
ACETI-AC	kg/day	0	0	0	2.83455e-14	5.13919e-17
PROPI-01	kg/day	0	0	0	7.07258e-13	8.14134e-16
ISOBU-01	kg/day	2.40768e-05	4.37027e-05	0	4.02464e-10	3.76612e-14
ISOVA-01	kg/day	0	0	0	1.94029e-14	1.00049e-17
H+	kg/day	0	0.00136239	0	1.9265e-16	0
OH-	kg/day	0	0.000458687	0	0.000475022	0
NH3	kg/day	0	1.45921e-05	0	0.0106824	0.000453158
NH4+	kg/day	0	1.05156e-21	0	2.4218e-15	0
CO2	kg/day	0	1.79119e-21	0	0.00069013	0.000935106
C5H7NO2	kg/day	0	1.07564e-20	0	0.000458688	7.93861e-09
ARGININE	kg/day	0	1.23792e-22	0	2.26278e-13	8.04842e-22
HISTIDIN	kg/day	0	1.10706e-05	0	0	0
LYSINE	kg/day	0	1.4986e-05	0	1.84661e-11	6.55378e-20
TYROSINE	kg/day	0	3.8056e-20	0	3.146e-11	4.41692e-92
TRYPTOPH	kg/day	0	1.04216e-05	0	2.5774e-11	3.61862e-92
PHENYLAL	kg/day	0	3.36499e-05	0	1.70489e-10	1.60715e-18
CYSTEINE	kg/day	0	1.70934e-05	0	1.4986e-05	1.3197e-15
METHIONI	kg/day	0	1.12328e-05	0	1.8717e-11	2.62782e-92
THREONIN	kg/day	0	1.61378e-05	0	1.51616e-11	2.12865e-92
SERINE	kg/day	0	2.02669e-05	0	5.32906e-14	7.48189e-95
LEUCINE	kg/day	0	1.18935e-05	0	1.70934e-05	2.39987e-86
ISOLEUCI	kg/day	0	3.49335e-05	0	3.04581e-13	4.27625e-94
VALINE	kg/day	0	7.79517e-06	0	5.87049e-14	8.24203e-95
GLUTAMIC	kg/day	0	2.37902e-05	0	3.51591e-13	2.0109e-21
ASPARTIC	kg/day	0	3.11832e-09	0	8.39874e-11	1.17917e-91
GLYCINE	kg/day	0	0.000222785	0	3.49335e-05	3.07556e-15
ALANINE	kg/day	0	1.90776e-22	0	7.79517e-06	1.09443e-86
PROLINE	kg/day	0	3.85511e-22	0	3.2813e-13	2.88958e-23
HYDROGEN	kg/day	0	4.5621e-05	0	3.65969e-09	4.9416e-07
METHANE	kg/day	0	1.98036e-21	0	0.000255764	0.00131953
INDOLE	kg/day	0	3.76097e-11	0	0	0
FROMAMID	kg/day	0	7.52676e-19	0	0	0
H2S	kg/day	0	0	0	2.03653e-10	5.89454e-11
CH4S	kg/day	0	0	0	0	0
BENZENE	kg/day	0	0	0	2.30816e-10	1.03732e-10
PHENOL	kg/day	0	0	0	0	0
H2CO3	kg/day	0.00529689	0.00158907	0	1.1488e-12	1.0906e-19
HCO3-	kg/day	0.00240768	0.000963071	0	0.0250776	0
CO3-2	kg/day	0	0	0	0.0102911	0
HS-	kg/day	9.63071e-05	9.63071e-06	0	0.00261543	0
CELLULOS	kg/day	9.63071e-05	9.63071e-06	0	0.00158907	2.23101e-84
HEMECELL	kg/day	0	9.12369e-07	0	0.000963071	2.42466e-12
GLUCOSE	kg/day	0	0	0	0	0
TRIOLEIN	kg/day	9.63071e-05	9.63071e-06	0	9.63071e-06	7.55295e-24
TRIPALM	kg/day	0	0.000273599	0	9.63071e-06	7.01423e-23
PALM	kg/day	0	0	0	9.12369e-07	8.64263e-15
SN-1--01	kg/day	0	3.34587e-07	0	0	0
SN-1--02	kg/day	0	0	0	9.63071e-06	6.83706e-20
XYLOSE	kg/day	0	0.0011741	0	0.000273599	2.88408e-14
FURFURAL	kg/day	0.000722303	6.42554e-05	0	0	0
LINOLEIC	kg/day	0.000433382	6.43261e-08	0	3.34587e-07	2.16801e-16
STARCH	kg/day	0	0	0	0	0
ETHANOL	kg/day	0.00264844	0.00264844	0	0.00119066	1.33342e-05
PROTEIN	kg/day	0	0	0	7.03415e-05	1.88884e-06
KERATIN	kg/day	0	0	0	0.000141588	7.51032e-05
ACETATE	kg/day	0	0	0	4.52758e-05	0
INERT	kg/day	0	0	0	0.00264844	2.89563e-19
C3H5O2-	kg/day	0	0	0	0.000857025	2.36977e-07
C5H9O2-	kg/day	0	0	0	3.04296e-08	1.58262e-12
C4H7O2-	kg/day	0	0	0	0.000716392	9.87133e-08
C18H33O2	kg/day	0	0	0	7.96498e-07	4.07389e-16
C3H6NO3-	kg/day	0	0	0	2.76664e-12	0
C5H10NO2	kg/day	0	0	0	3.57342e-12	5.017e-93
C5H8NO4-	kg/day	0	0	0	1.30571e-05	7.46919e-14
ISOLE-01	kg/day	0	0	0	1.23925e-05	1.73989e-86
PROLI-01	kg/day	0	0	0	1.16681e-05	1.02752e-15
TYROS-01	kg/day	0	0	0	6.27973e-12	1.90087e-23
TRYPT-01	kg/day	0	0	0	3.64273e-12	2.42267e-23
ARGIN-01	kg/day	0	0	0	2.06513e-09	1.12377e-11
LYSIN-01	kg/day	0	0	0	1.88654e-13	6.69662e-22
PHENY-01	kg/day	0	0	0	2.59667e-11	2.44821e-19
METHI-01	kg/day	0	0	0	3.87978e-12	5.44713e-93
THREO-01	kg/day	0	0	0	2.00159e-13	2.81018e-94
ASPAR-01	kg/day	0	0	0	2.5865e-12	3.63139e-93
C4H6NO4-	kg/day	0	0	0	2.76367e-11	3.88013e-92
C6H13N2O	kg/day	0	0	0	6.0575e-10	2.15022e-18
TYROS-02	kg/day	0	0	0	6.98665e-07	2.11486e-18
TYROS-03	kg/day	0	0	0	7.01447e-13	2.12328e-24
TRYPT-02	kg/day	0	0	0	2.51951e-10	1.67566e-21
ARGIN-02	kg/day	0	0	0	2.15747e-06	1.17402e-08
ARGIN-03	kg/day	0	0	0	4.85073e-13	2.6396e-15
PHENY-02	kg/day	0	0	0	4.10339e-06	3.86879e-14
METHI-02	kg/day	0	0	0	1.33834e-10	1.879e-91
THREO-02	kg/day	0	0	0	7.62623e-07	1.07071e-87
AMMON(S)	kg/day	0	0	0	0	0
NH4HS(S)	kg/day	0	0	0	1.93067e-08	2.71062e-89
SALT1	kg/day	0	0	0	0.000374822	5.26242e-85
S--	kg/day	0	0	0	0	0
NH2COO	kg/day	0	0	0	3.9966e-15	0
H3PO4	kg/day	0	0	0	4.8714e-14	9.53205e-30
H2PO4-	kg/day	0	0	0	7.85755e-06	0
HPO4--	kg/day	0	0	0	2.0672e-09	0
PO4---	kg/day	0	5.17781e-06	5.17781e-06	9.19288e-06	0
DIAMM-01	kg/day	0	0	0	0	0
SALT3	kg/day	0	0	0	0	0
K+	kg/day	0	0	0	3.5262e-10	0
KH2PO4	kg/day	0	0	0	0.0341044	4.78818e-83
K2HPO4	kg/day	0	1.10948e-06	1.10948e-06	0.00130665	1.83451e-84
K2CO3	kg/day	0	0	0	0	0
KHCO3	kg/day	0	0	0	0	0
K3PO4	kg/day	0	0	0	0	0
MG(OH)2	kg/day	0	1.70954e-06	1.70954e-06	0.00010211	1.4336e-85
MG++	kg/day	0	0	0	0.00518691	0
STRUVITE	kg/day	0	2.03309e-06	2.03309e-06	0	0
FE+++	kg/day	0	0	0	0	0
FE(OH)2	kg/day	0	0	0	0.00020609	2.89346e-85
FE++	kg/day	0	1.40955e-06	1.40955e-06	0.0126984	0
FE(OH)3	kg/day	0	0	0	2.02823e-06	2.84759e-87
FES	kg/day	0	0	0	0	0
FECO3	kg/day				1.3126e-19	5.21948e-96
CA(OH)2	kg/day	0.940847	0.954395	0	0.000106564	1.49613e-85
CA++	kg/day	0	5.94657e-05	0	0.00793582	0
CACO3	kg/day	0	2.89178e-06	0	0	0
HCL	kg/day	0.010009	4.0094e-06	0	2.49148e-09	2.10227e-09
CL-	kg/day	0	0.000194437	0	0.0250415	0
Mass Fractions		0	0.00367235	0
WATER		0	0.00306789	0	0.0233307	0.168177
GLYCEROL		0	8.71823e-09	0
OLEIC-AC		0	0	0		-1.35213e+08
DEXTROSE		0	0	0		-6.46743e+06
ACETI-AC		0.00010009	0.000185087	0		-56359.8
PROPI-01		0	0	0		-2695.76
ISOBU-01		0	0.00576989	0		0.0371548
ISOVA-01		0	0.0019426	0		0.776789
H+		0	6.17996e-05	0		-0.234692
OH-		0	4.45347e-21	0		20.9068
NH3		0	7.58591e-21	0		6.24859e-06
NH4+		0	4.55548e-20	0
CO2		0	5.24276e-22	0		0.00313531
C5H7NO2		0	4.68853e-05	0
ARGININE		0	6.34676e-05	0
HISTIDIN		0	1.61172e-19	0	-4.59416e+07
LYSINE		0	4.41369e-05	0	-1.93439e+06
TYROSINE		0	0.000142511	0	1.06482e+38
TRYPTOPH		0	7.23925e-05	0	4.48346e+36
PHENYLAL		0	4.75722e-05	0	28.3857
CYSTEINE		0	6.83458e-05	0	674.159
METHIONI		0	8.58328e-05	0	-8.45146
THREONIN		0	5.03707e-05	0	23.7499
SERINE		0	0.000147948	0	0.00066226
LEUCINE		0	3.30136e-05	0
ISOLEUCI		0	0.000100755	0	0.377487
VALINE		0	1.32065e-08	0	3.31059e-14	2.84318e-93
GLUTAMIC		0	0.000943523	0	0.0011343	3.96845e-10
ASPARTIC		0	8.07962e-22	0	1.81777e-12	1.56112e-91
GLYCINE		0	1.63269e-21	0	0.00011706	6.3042e-13
ALANINE		0	0.000193211	0	2.61212e-05	2.24332e-84
PROLINE		0	8.3871e-21	0	0.00109433	5.89489e-12
HYDROGEN		0	1.59282e-10	0	5.13444e-09	4.24086e-05
METHANE		0	3.18768e-18	0	0.000394655	0.124547
INDOLE		0	0	0	0	0
FROMAMID		0	0	0	0	0
H2S		0	0	0	6.53389e-10	1.12682e-08
CH4S		0	0	0	0	0
BENZENE		0.0220198	0.0067299	0	2.68663e-10	2.17367e-08
PHENOL		0.010009	0.00407873	0	0	0
H2CO3		0	0	0	4.55592e-10	2.64568e-15
HCO3-		0.00040036	4.07873e-05	0	1.02729e-08	0
CO3-2		0.00040036	4.07873e-05	0	4.86172e-18	0
HS-		0	3.864e-06	0	0.00186256	0
CELLULOS		0	0	0	0.00532487	4.57306e-82
HEMECELL		0.00040036	4.07873e-05	0	0.00322719	4.96999e-10
GLUCOSE		0	0.00115873	0	0	0
TRIOLEIN		0	0	0	3.22719e-05	1.54818e-21
TRIPALM		0	1.41702e-06	0	3.22719e-05	1.43775e-20
PALM		0	0	0	3.0573e-06	1.77154e-12
SN-1--01		0	0.00497248	0	0	0
SN-1--02		0.0030027	0.00027213	0	3.22719e-05	1.40144e-17
XYLOSE		0.00180162	2.72429e-07	0	0.000916813	5.91169e-12
FURFURAL		0	0	0	0	0
LINOLEIC		0.0110099	0.0112165	0	1.12118e-06	4.44391e-14
STARCH		0	0	0	0	0
ETHANOL		0	0	0	0.00388729	0.00375417
PROTEIN		0	0	0	0.000224068	0.000458276
KERATIN		0	0	0	6.72902e-05	0.0168007
ACETATE		0	0	0	0.000135385	0
INERT		0	0	0	0.00887478	3.45319e-16
C3H5O2-		0	0	0	0.00235915	3.99031e-05
C5H9O2-		0	0	0	2.5532e-05	8.12276e-08
C4H7O2-		0	0	0	0.00127168	1.07187e-05
C18H33O2		0	0	0	0.000232706	7.28066e-12
C3H6NO3-		0	0	0	6.04559e-06	0
C5H10NO2		0	0	0	0	0
C5H8NO4-		0	0	0	1.92427e-08	6.73336e-15
ISOLE-01		0	0	0	2.09143e-08	1.79615e-87
PROLI-01		0	0	0	1.86215e-08	1.0031e-16
TYROS-01		0	0	0	2.21037e-12	4.09275e-22
TRYPT-01		0	0	0	1.08586e-19	8.17251e-24
ARGIN-01		0	0	0	2.05634e-14	6.84486e-15
LYSIN-01		0	0	0	1.65318e-16	3.11616e-21
PHENY-01		0	0	0	8.011e-12	4.62017e-18
METHI-01		0	0	0	6.48191e-20	1.25819e-93
THREO-01		0	0	0	2.63963e-20	1.00271e-93
ASPAR-01		0	0	0	1.83255e-17	1.12142e-93
C4H6NO4-		0	0	0	4.01257e-12	3.44604e-91
C6H13N2O		0	0	0	5.98909e-08	1.30043e-14
TYROS-02		0	0	0	1.77467e-05	3.28601e-15
TYROS-03		0	0	0	2.44311e-13	4.5237e-23
TRYPT-02		0	0	0	2.01882e-14	8.21304e-24
ARGIN-02		0	0	0	2.84522e-06	9.47077e-07
ARGIN-03		0	0	0	2.17011e-16	1.34435e-16
PHENY-02		0	0	0	0.000157817	9.10176e-11
METHI-02		0	0	0	1.47499e-14	1.26674e-93
THREO-02		0	0	0	1.17752e-14	1.01127e-93
AMMON(S)		0	0	0	0	0
NH4HS(S)		0	0	0	0.000623556	5.35518e-83
SALT1		0	0	0	0	0
S--		0	0	0	0	0
NH2COO		0	0	0	0	0
H3PO4		0	0	0	0.0050514	6.0462e-17
H2PO4-		0	2.19287e-05	0.452627	0.025316	0
HPO4--		0	0	0	5.62632e-09	0
PO4---		0	0	0	1.45915e-20	0
DIAMM-01		0	0	0	0	0
SALT3		0	0	0	0	0
K+		0	4.69879e-06	0.096987	0.0114253	0
KH2PO4		0	0	0	1.82906e-17	1.15529e-93
K2HPO4		0	0	0	0	0
K2CO3		0	0	0	0	0
KHCO3		0	7.24012e-06	0.149442	0	0
K3PO4		0	0	0	0	0
MG(OH)2		0	8.61039e-06	0.177726	0	0
MG++		0	0	0	0.00583517	0
STRUVITE		0	0	0	0	0
FE+++		0	5.96961e-06	0.123218	0	0
FE(OH)2		0	0	0	0	0
FE++		0	0	0	0.0180886	0
FE(OH)3		0.013875	0.0102231	8.33333e-07	6.79649e-06	5.83691e-85
FES					0	0
FECO3		-2.31039e+08			0	0
CA(OH)2		-2.03224e+06			0	0
CA++		-764281			0.011387	0
CACO3		-6722.69			0	0
HCL		0.0411507			7.0539e-10	3.64082e-08
CL-		4.6783			0.091845	0
Volume Flow	l/hr	-0.0101447			0.01763	0.392293
Vapor Phase		113.687
Molar Enthalpy	J/kmol	1.58072e-07				-2.86689e+08
Mass Enthalpy	J/kg					-8.56976e+06
Molar Entropy	J/kmol-K	0.000431297				-17224.1
Mass Entropy	J/kg-K					-514.868
Molar Density	kmol/cum					0.0371548
Mass Density	kg/cum	-2.88077e+08	-2.83718e+08	-6.04276e+08		1.24296
Enthalpy Flow	Watt	-1.51851e+07	-1.5207e+07	-6.02956e+06		-1.16074
Average MW		-167180	-156671	1.03038e+06		33.4535
Mole Flows	kmol/hr	-8812.41	-8397.41	10281.3		1.45756e-05
Mole Fractions		52.5612	51.5819	5.70723
Mass Flows	kg/day	997.138	962.364	571.973		0.0117025
Mass Fractions		-42.2019	-41.5588	-0.000798321
Liquid Phase		18.971	18.657	100.219
Molar Enthalpy	J/kmol	0.000527383	0.000527326	4.75603e-09	-2.26448e+08
Mass Enthalpy	J/kg				-1.09269e+07
Molar Entropy	J/kmol-K	0.24012	0.23612	1.14395e-05	7.78608e+37
Mass Entropy	J/kg-K				3.75704e+36
Molar Density	kmol/cum				34.0327
Mass Density	kg/cum				705.293
Enthalpy Flow	Watt				-37.7411
Average MW					20.724
Mole Flows	kmol/hr				0.000599997
Mole Fractions
Mass Flows	kg/day				0.298424
Mass Fractions

## Sheet: Soluble K
	Units	INPUT	LIQUID	NUTRIENT	S1	S2	Formula	Molecular Mass	K molar mass fraction	K Mol Flow	soluble										Molar Mass
Description
From			B1		B4	B4
To		B2	B4	B2
Stream Class		CONVEN	CONVEN	CONVEN	CONVEN	CONVEN
Maximum Relative Error
Cost Flow	$/sec
MIXED Substream
Phase			Liquid Phase	Liquid Phase	Liquid Phase	Vapor Phase
Temperature	K	296.15	328.15	296.15	328	328
Pressure	N/sqm	101325	101325	101325	101325	101325
Molar Vapor Fraction		0.000299639	0	0	0	1
Molar Liquid Fraction		0.9997	1	1	1	0
Molar Solid Fraction		0	0	0	0	0
Mass Vapor Fraction		0.00179295	0	0	0	1
Mass Liquid Fraction		0.998207	1	1	1	1.44329e-15
Mass Solid Fraction		0	0	0	0	0
Molar Enthalpy	J/kmol	-2.8806e+08	-2.83718e+08	-6.04276e+08	-4.15427e+10	-2.10227e+08
Mass Enthalpy	J/kg	-1.51615e+07	-1.5207e+07	-6.02956e+06	-2.1962e+09	-7.74176e+06
Molar Entropy	J/kmol-K	-167359	-156671	1.03038e+06		-39940.2
Mass Entropy	J/kg-K	-8808.66	-8397.41	10281.3		-1470.82
Molar Density	kmol/cum	38.021	51.5819	5.70723	50.2494	0.0371548
Mass Density	kg/cum	722.375	962.364	571.973	950.501	1.00894
Enthalpy Flow	Watt	-42.2121	-41.5588	-0.000798321	-6118.1	-0.424266
Average MW		18.9994	18.657	100.219	18.9157	27.155
Mole Flows	mol/hr	0.527541	0.527326	4.75603e-06	0.66226	0.00624859	Alias	g/mol			non soluble										N	14
WATER	mol/hr	0.523448	0.521206	0	0.534726	0.000777908	H2O	18	0	0			K								C	12
GLYCEROL	mol/hr	0	6.35264e-06	0	6.35264e-06	2.58898e-13	C3H8O3	92	0	0			Soluble flow (mol/hr)	0.00303957							H	1
OLEIC-AC	mol/hr	0	1.00723e-07	0	8.16623e-14	4.17371e-23	C18H34O2	282	0	0			Non-Soluble flow (mol/hr)	0							O	16
DEXTROSE	mol/hr	0.000556845	2.18952e-07	0	2.18952e-07	4.20247e-20	C6H12O6	180	0	0			Soluble mol frac (%)	0.45897							S	32
ACETI-AC	mol/hr	0	3.18543e-05	0	1.96672e-14	3.56576e-17	C2H4O2	60	0	0			Non-Soluble mol frac (%)	0							Fe	56
PROPI-01	mol/hr	0	0.000487717	0	3.97804e-13	4.57917e-16	C3H6O2	74	0	0			Soluble concentration (mol/l)	0.172409							Ca	40
ISOBU-01	mol/hr	0	0.000342575	0	1.90331e-10	1.78105e-14	C4H8O2	88	0	0			Non soluble concentration (mol/l)	0							P	31
ISOVA-01	mol/hr	0	8.39815e-10	0	7.91568e-15	4.08163e-18	C5H10O2	102	0	0			pH	12.3417	12.8196						K	39
H+	mol/hr	0	0	0	8.02707e-15	0	H+	1	0	0				H+	OH-						Mg	24
OH-	mol/hr	0	0	0	0.00116377	0	OH-	17	0	0			Molar Flow	8.02707e-15	0.00116377
NH3	mol/hr	5.89058e-05	0.000106922	0	0.0261355	0.00110869	H3N	17	0	0			Volume Flow	0.01763	0.01763
NH4+	mol/hr	0	0	0	5.59404e-15	0	NH4+	18	0	0			Concentration	4.55307e-13	0.0660105	3.0055e-14
CO2	mol/hr	0	0.00128985	0	0.000653386	0.00088532	CO2	14	0	0
C5H7NO2	mol/hr	0	0.000168959	0	0.000168959	2.92421e-09	C5H7NO2	113	0	0
ARGININE	mol/hr	0	3.49022e-06	0	5.41222e-14	1.92506e-22	C6H14N4O2	174	0	0
HISTIDIN	mol/hr	0	2.84238e-22	0	0	0	C6H8N3O2	155	0	0
LYSINE	mol/hr	0	5.10521e-22	0	5.26319e-12	1.86795e-20	C6H14N2O2	146	0	0
TYROSINE	mol/hr	0	2.47354e-21	0	7.23454e-12	1.01571e-92	C9H11NO3	181	0	0
TRYPTOPH	mol/hr	0	2.5256e-23	0	5.25841e-12	7.38269e-93	C11H12N2O2	204	0	0
PHENYLAL	mol/hr	0	2.79235e-06	0	4.30028e-11	4.05373e-19	C9H11NO2	165	0	0
CYSTEINE	mol/hr	0	5.19688e-06	0	5.19688e-06	4.57649e-16	C3H6NO2S	121	0	0
METHIONI	mol/hr	0	1.06268e-20	0	5.22655e-12	7.33796e-93	C5H11NO2S	149	0	0
THREONIN	mol/hr	0	3.64534e-06	0	5.30331e-12	7.44573e-93	C4H9NO3	119	0	0
SERINE	mol/hr	0	1.33412e-05	0	2.11283e-14	2.96636e-95	C3H7NO3	105	0	0
LEUCINE	mol/hr	0	5.42957e-06	0	5.42957e-06	7.623e-87	C6H13NO2	131	0	0
ISOLEUCI	mol/hr	0	3.56801e-06	0	9.67479e-14	1.35832e-94	C6H13NO2	131	0	0
VALINE	mol/hr	0	5.73984e-06	0	2.08799e-14	2.93149e-95	C5H11NO2	117	0	0
GLUTAMIC	mol/hr	0	5.73947e-06	0	9.95687e-14	5.69477e-22	C5H9NO4	147	0	0
ASPARTIC	mol/hr	0	3.72314e-06	0	2.62913e-11	3.69124e-92	C4H7NO4	133	0	0
GLYCINE	mol/hr	0	1.93901e-05	0	1.93901e-05	1.70712e-15	C2H5NO2	75	0	0
ALANINE	mol/hr	0	3.64557e-06	0	3.64557e-06	5.1183e-87	C3H7NO2	89	0	0
PROLINE	mol/hr	0	8.60975e-06	0	1.18751e-13	1.04575e-23	C5H9NO2	115	0	0
HYDROGEN	mol/hr	0	6.44532e-08	0	7.56428e-08	1.02139e-05	H2	2	0	0
METHANE	mol/hr	0	0.000578623	0	0.000664276	0.00342711	CH4	16	0	0
INDOLE	mol/hr	0	6.78531e-23	0	0	0	C8H7N	117	0	0
FROMAMID	mol/hr	0	3.5663e-22	0	0	0	CH3NO	45	0	0
H2S	mol/hr	0	5.57738e-05	0	2.48975e-10	7.20634e-11	H2S	34	0	0
CH4S	mol/hr	0	1.71518e-21	0	0	0	CH4S	48	0	0
BENZENE	mol/hr	0	2.00614e-11	0	1.2312e-10	5.53319e-11	C6H6	78	0	0
PHENOL	mol/hr	0	3.33232e-19	0	0	0	C6H6O	94	0	0
H2CO3	mol/hr	0	0	0	7.71731e-13	7.32635e-20	H2CO3	62	0	0
HCO3-	mol/hr	0	0	0	0.0171247	0	HCO3-	61	0	0
CO3-2	mol/hr	0	0	0	0.0071455	0	CO3--	60	0	0
HS-	mol/hr	0	0	0	0.00329493	0	HS-	33	0	0
CELLULOS	mol/hr	0.00136117	0.000408352	0	0.000408352	5.73317e-85	C6H10O5	162	0	0
HEMECELL	mol/hr	0.000759331	0.000303732	0	0.000303732	7.64687e-13	C5H8O4	132	0	0
GLUCOSE	mol/hr	0	0	0	0	0	C6H12O6	180	0	0
TRIOLEIN	mol/hr	4.53207e-06	4.53207e-07	0	4.53207e-07	3.55431e-25	C57H104O6	884	0	0
TRIPALM	mol/hr	4.97567e-06	4.97567e-07	0	4.97567e-07	3.62387e-24	C51H98O6	806	0	0
PALM	mol/hr	0	1.48414e-07	0	1.48414e-07	1.40588e-15	C16H34O	242	0	0
SN-1--01	mol/hr	0	0	0	0	0	C37H70O5	594	0	0
SN-1--02	mol/hr	6.77082e-06	6.77082e-07	0	6.77082e-07	4.80676e-21	C37H68O5	592	0	0
XYLOSE	mol/hr	0	7.59331e-05	0	7.59331e-05	8.00431e-15	C5H10O5	150	0	0
FURFURAL	mol/hr	0	0	0	0	0	C5H4O2	96	0	0
LINOLEIC	mol/hr	0	4.97097e-08	0	4.97097e-08	3.22102e-17	C18H32O2	280	0	0
STARCH	mol/hr	0	0	0	0	0	C6H10O5	162	0	0
ETHANOL	mol/hr	0	0.00106191	0	0.00107688	1.206e-05	C2H6O	62	0	0
PROTEIN	mol/hr	8.19116e-05	7.28678e-06	0	7.97696e-06	2.142e-07	C13H25O7N3S	367	0	0
KERATIN	mol/hr	0.000155141	2.30273e-08	0	5.06851e-05	2.68852e-05	C(4.89)H8NO(2.1)S(0.67)	116.424	0	0
ACETATE	mol/hr	0	0	0	3.19502e-05	0	CH3COO-	59	0	0
INERT	mol/hr	0.00110352	0.00110352	0	0.00110352	1.20651e-19	INERT	x	0	0
C3H5O2-	mol/hr	0	0	0	0.000488691	1.35128e-07	C3H5O2-	73	0	0
C5H9O2-	mol/hr	0	0	0	1.25379e-08	6.52088e-13	C5H9O2-	101	0	0
C4H7O2-	mol/hr	0	0	0	0.000342712	4.72231e-08	C4H7O2-	87	0	0
C18H33O2	mol/hr	0	0	0	1.17494e-07	6.00954e-17	C18H33O2	281	0	0
C3H6NO3-	mol/hr	0	0	0	1.10751e-12	0	C3H6NO3-	104	0	0
C5H10NO2	mol/hr	0	0	0	1.28201e-12	1.79991e-93	C5H10NO2-	116	0	0
C5H8NO4-	mol/hr	0	0	0	3.7232e-06	2.12983e-14	C5H8NO4-	146	0	0
ISOLE-01	mol/hr	0	0	0	3.96688e-06	5.56941e-87	C6H12NO2-	130	0	0
PROLI-01	mol/hr	0	0	0	4.26001e-06	3.75146e-16	C5H8NO2-	114	0	0
TYROS-01	mol/hr	0	0	0	1.45216e-12	4.39569e-24	C9H10NO3-	164	0	0
TRYPT-01	mol/hr	0	0	0	7.46874e-13	4.96725e-24	C11H11N2O2-	203	0	0
ARGIN-01	mol/hr	0	0	0	4.96823e-10	2.70354e-12	C6H13N4O2-	173	0	0
LYSIN-01	mol/hr	0	0	0	5.41432e-14	1.92191e-22	C6H13N2O2-	145	0	0
PHENY-01	mol/hr	0	0	0	6.58983e-12	6.21308e-20	C9H10NO2-	164	0	0
METHI-01	mol/hr	0	0	0	1.09076e-12	1.53141e-93	C5H10NO2S-	148	0	0
THREO-01	mol/hr	0	0	0	7.06102e-14	9.91351e-95	C4H8NO3-	118	0	0
ASPAR-01	mol/hr	0	0	0	8.15852e-13	1.14544e-93	C4H6NO4-	132	0	0
C4H6NO4-	mol/hr	0	0	0	8.65134e-12	1.21463e-92	C4H6NO4-	132	0	0
C6H13N2O	mol/hr	0	0	0	1.7265e-10	6.12852e-19	C6H13N2O2-	145	0	0
TYROS-02	mol/hr	0	0	0	1.60665e-07	4.86332e-19	C9H10NO3-	164	0	0
TYROS-03	mol/hr	0	0	0	1.61304e-13	4.88268e-25	C9H10NO3-	164	0	0
TRYPT-02	mol/hr	0	0	0	5.14031e-11	3.41867e-22	C11H11N2O2-	173	0	0
ARGIN-02	mol/hr	0	0	0	5.16033e-07	2.80807e-09	C6H13N4O2-	173	0	0
ARGIN-03	mol/hr	0	0	0	1.16022e-13	6.31351e-16	C6H13N4O2-	173	0	0
PHENY-02	mol/hr	0	0	0	1.03501e-06	9.75833e-15	C9H10NO2-	164	0	0
METHI-02	mol/hr	0	0	0	3.73719e-11	5.24693e-92	C5H10NO2S-	148	0	0
THREO-02	mol/hr	0	0	0	2.66755e-07	3.74518e-88	C4H8NO3	118	0	0
AMMON(S)	mol/hr	0	0	0	0	0	NH2COONH4	78	0	0
NH4HS(S)	mol/hr	0	0	0	1.57387e-08	2.20968e-89	NH4HS	51	0	0
SALT1	mol/hr	0	0	0	0.000197552	2.77358e-85	NH4HCO3	79	0	0
S--	mol/hr	0	0	0	0	0	S-2	32	0	0
NH2COO	mol/hr	0	0	0	2.77389e-15	0	NH2COO-	230	0	0
H3PO4	mol/hr	0	0	0	2.07128e-14	4.05294e-30	H3PO4	98	0	0
H2PO4-	mol/hr	0	0	0	3.37566e-06	0	H2PO4-	97	0	0
HPO4--	mol/hr	0	0	0	8.97405e-10	0	HPO4-2	96	0	0
PO4---	mol/hr	0	0	0	4.03311e-06	0	PO4-3	95	0	0
DIAMM-01	mol/hr	0	0	0	0	0	(NH4)2HPO4	132	0	0
SALT3	mol/hr	0	0	0	0	0	NH6PO4	115	0	0
K+	mol/hr	0	0	0	3.75789e-10	0	K+	39	1	3.75789e-10
KH2PO4	mol/hr	0	1.58534e-06	1.58534e-06	0.0104421	1.46605e-83	KH2PO4	136	0.286765	0.00299442
K2HPO4	mol/hr	0	0	0	0.00031258	4.38855e-85	K2HPO4	270	0.144444	4.51504e-05
K2CO3	mol/hr	0	0	0	0	0	K2CO3	138	0.282609	0
KHCO3	mol/hr	0	0	0	0	0	KHCO3	100	0.39	0
K3PO4	mol/hr	0	0	0	0	0	K3PO4	249	0.46988	0
MG(OH)2	mol/hr	0	7.92671e-07	7.92671e-07	7.29526e-05	1.02424e-85	MG(OH)2	58	0	0
MG++	mol/hr	0	0	0	0.00889245	0	MG+2	24	0	0
STRUVITE	mol/hr	0	0	0	0	0	NH4MgPO4.6H2O	245	0	0
FE+++	mol/hr	0	0	0	0	0	FE+3	56	0	0
FE(OH)2	mol/hr	0	7.92671e-07	7.92671e-07	9.55588e-05	1.34162e-85	FE(OH)2	90	0	0
FE++	mol/hr	0	0	0	0.00947431	0	FE+2	56	0	0
FE(OH)3	mol/hr	0	7.92671e-07	7.92671e-07	7.90778e-07	1.11024e-87	FE(OH)3	107	0	0
FES	mol/hr	0	0	0	0	0	FES	88	0	0
FECO3	mol/hr	0	0	0	4.72066e-20	1.87714e-96	FECO3	116	0	0
CA(OH)2	mol/hr	0	7.92671e-07	7.92671e-07	5.9927e-05	8.41362e-86	CA(OH)2	74	0	0
CA++	mol/hr	0	0	0	0.00825062	0	CA+2	40	0	0
CACO3	mol/hr	0	0	0	0	0	CACO3	100	0	0
HCL	mol/hr				2.84722e-09	2.40244e-09
CL-	mol/hr	0.992241	0.988393	0	0.0294301	0
Mole Fractions		0	1.20469e-05	0
WATER		0	1.91008e-07	0	0.807426	0.124493
GLYCEROL		0.00105555	4.15211e-07	0	9.59237e-06	4.14331e-11
OLEIC-AC		0	6.04073e-05	0	1.23309e-13	6.67944e-21
DEXTROSE		0	0.000924887	0	3.30614e-07	6.72548e-18
ACETI-AC		0	0.000649644	0	2.9697e-14	5.7065e-15
PROPI-01		0	1.59259e-09	0	6.00677e-13	7.32833e-14
ISOBU-01		0	0	0	2.87396e-10	2.85032e-12
ISOVA-01		0	0	0	1.19525e-14	6.53208e-16
H+		0.000111661	0.000202763	0	1.21207e-14	0
OH-		0	0	0	0.00175727	0
NH3		0	0.00244602	0	0.0394641	0.17743
NH4+		0	0.000320406	0	8.4469e-15	0
CO2		0	6.6187e-06	0	0.000986601	0.141683
C5H7NO2		0	5.39017e-22	0	0.000255125	4.6798e-07
ARGININE		0	9.68131e-22	0	8.17236e-14	3.08079e-20
HISTIDIN		0	4.69072e-21	0	0	0
LYSINE		0	4.78945e-23	0	7.94732e-12	2.98939e-18
TYROSINE		0	5.2953e-06	0	1.0924e-11	1.62551e-90
TRYPTOPH		0	9.85514e-06	0	7.9401e-12	1.1815e-90
PHENYLAL		0	2.01522e-20	0	6.49334e-11	6.48744e-17
CYSTEINE		0	6.91287e-06	0	7.84719e-06	7.32404e-14
METHIONI		0	2.52998e-05	0	7.89199e-12	1.17434e-90
THREONIN		0	1.02964e-05	0	8.00791e-12	1.19159e-90
SERINE		0	6.76622e-06	0	3.19033e-14	4.74725e-93
LEUCINE		0	1.08848e-05	0	8.19856e-06	1.21996e-84
ISOLEUCI		0	1.08841e-05	0	1.46087e-13	2.1738e-92
VALINE		0	7.0604e-06	0	3.15283e-14	4.69145e-93
GLUTAMIC		0	3.67706e-05	0	1.50347e-13	9.11369e-20
ASPARTIC		0	6.91331e-06	0	3.96994e-11	5.90732e-90
GLYCINE		0	1.63272e-05	0	2.92787e-05	2.732e-13
ALANINE		0	1.22226e-07	0	5.50475e-06	8.19113e-85
PROLINE		0	0.00109728	0	1.79312e-13	1.67358e-21
HYDROGEN		0	1.28674e-22	0	1.14219e-07	0.00163459
METHANE		0	6.76299e-22	0	0.00100304	0.548461
INDOLE		0	0.000105767	0	0	0
FROMAMID		0	3.2526e-21	0	0	0
H2S		0	3.80436e-11	0	3.75948e-10	1.15328e-08
CH4S		0	6.31928e-19	0	0	0
BENZENE		0	0	0	1.85909e-10	8.85511e-09
PHENOL		0	0	0	0	0
H2CO3		0	0	0	1.1653e-12	1.17248e-17
HCO3-		0	0	0	0.025858	0
CO3-2		0.00258022	0.000774381	0	0.0107896	0
HS-		0.00143938	0.000575985	0	0.00497529	0
CELLULOS		0	0	0	0.000616603	9.17514e-83
HEMECELL		8.59094e-06	8.59444e-07	0	0.00045863	1.22378e-10
GLUCOSE		9.4318e-06	9.43565e-07	0	0	0
TRIOLEIN		0	2.81445e-07	0	6.84335e-07	5.68818e-23
TRIPALM		0	0	0	7.51317e-07	5.79951e-22
PALM		1.28347e-05	1.28399e-06	0	2.24102e-07	2.24992e-13
SN-1--01		0	0.000143996	0	0	0
SN-1--02		0	0	0	1.02238e-06	7.69255e-19
XYLOSE		0	9.42674e-08	0	0.000114658	1.28098e-12
FURFURAL		0	0	0	0	0
LINOLEIC		0	0.00201375	0	7.50608e-08	5.15479e-15
STARCH		0.00015527	1.38183e-05	0	0	0
ETHANOL		0.000294082	4.36679e-08	0	0.00162607	0.00193004
PROTEIN		0	0	0	1.20451e-05	3.42798e-05
KERATIN		0.00209181	0.00209267	0	7.65336e-05	0.0043026
ACETATE		0	0	0	4.82443e-05	0
INERT		0	0	0	0.00166629	1.93086e-17
C3H5O2-		0	0	0	0.000737914	2.16254e-05
C5H9O2-		0	0	0	1.8932e-08	1.04358e-10
C4H7O2-		0	0	0	0.000517489	7.55741e-06
C18H33O2		0	0	0	1.77414e-07	9.61744e-15
C3H6NO3-		0	0	0	1.67232e-12	0
C5H10NO2		0	0	0	1.93581e-12	2.88051e-91
C5H8NO4-		0	0	0	5.62197e-06	3.40849e-12
ISOLE-01		0	0	0	5.98992e-06	8.91307e-85
PROLI-01		0	0	0	6.43254e-06	6.0037e-14
TYROS-01		0	0	0	2.19274e-12	7.03469e-22
TRYPT-01		0	0	0	1.12777e-12	7.94939e-22
ARGIN-01		0	0	0	7.50193e-10	4.32664e-10
LYSIN-01		0	0	0	8.17552e-14	3.07575e-20
PHENY-01		0	0	0	9.95052e-12	9.94318e-18
METHI-01		0	0	0	1.64703e-12	2.45081e-91
THREO-01		0	0	0	1.0662e-13	1.58652e-92
ASPAR-01		0	0	0	1.23192e-12	1.83312e-91
C4H6NO4-		0	0	0	1.30634e-11	1.94385e-90
C6H13N2O		0	0	0	2.60698e-10	9.80785e-17
TYROS-02		0	0	0	2.42601e-07	7.78307e-17
TYROS-03		0	0	0	2.43567e-13	7.81405e-23
TRYPT-02		0	0	0	7.76177e-11	5.47111e-20
ARGIN-02		0	0	0	7.79201e-07	4.49393e-07
ARGIN-03		0	0	0	1.75191e-13	1.01039e-13
PHENY-02		0	0	0	1.56284e-06	1.56169e-12
METHI-02		0	0	0	5.64309e-11	8.39699e-90
THREO-02		0	0	0	4.02795e-07	5.99364e-86
AMMON(S)		0	0	0	0	0
NH4HS(S)		0	0	0	2.37652e-08	3.53629e-87
SALT1		0	0	0	0.0002983	4.43874e-83
S--		0	0	0	0	0
NH2COO		0	0	0	4.18852e-15	0
H3PO4		0	0	0	3.12759e-14	6.48618e-28
H2PO4-		0	0	0	5.09719e-06	0
HPO4--		0	0	0	1.35507e-09	0
PO4---		0	0	0	6.08992e-06	0
DIAMM-01		0	0	0	0	0
SALT3		0	3.00638e-06	0.333333	0	0
K+		0	0	0	5.67434e-10	0
KH2PO4		0	0	0	0.0157674	2.3462e-81
K2HPO4		0	0	0	0.00047199	7.02327e-83
K2CO3		0	0	0	0	0
KHCO3		0	1.50319e-06	0.166667	0	0
K3PO4		0	0	0	0	0
MG(OH)2		0	0	0	0.000110157	1.63915e-83
MG++		0	0	0	0.0134274	0
STRUVITE		0	1.50319e-06	0.166667	0	0
FE+++		0	0	0	0	0
FE(OH)2		0	1.50319e-06	0.166667	0.000144292	2.14709e-83
FE++		0	0	0	0.014306	0
FE(OH)3		0	0	0	1.19406e-06	1.77678e-85
FES		0	1.50319e-06	0.166667	0	0
FECO3		0	0	0	7.12811e-20	3.00411e-94
CA(OH)2		0	0	0	9.04887e-05	1.34648e-83
CA++		0.240551	0.23612	1.14395e-05	0.0124583	0
CACO3		0.226322	0.225352	0	0	0
HCL		0	1.40411e-05	0	4.29926e-09	3.84478e-07
CL-		0	6.82808e-07	0	0.044439	0
Mass Flows	kg/day	0.00240768	9.46701e-07	0	0.377487	0.00313531
WATER	kg/day	0	4.59104e-05	0	0.231198	0.000336341
GLYCEROL	kg/day	0	0.000867116	0	1.40411e-05	5.72236e-13
OLEIC-AC	kg/day	0	0.000724392	0	5.53592e-13	2.82937e-22
DEXTROSE	kg/day	0	2.05855e-09	0	9.46701e-07	1.81706e-19
ACETI-AC	kg/day	0	0	0	2.83455e-14	5.13919e-17
PROPI-01	kg/day	0	0	0	7.07258e-13	8.14134e-16
ISOBU-01	kg/day	2.40768e-05	4.37027e-05	0	4.02464e-10	3.76612e-14
ISOVA-01	kg/day	0	0	0	1.94029e-14	1.00049e-17
H+	kg/day	0	0.00136239	0	1.9265e-16	0
OH-	kg/day	0	0.000458687	0	0.000475022	0
NH3	kg/day	0	1.45921e-05	0	0.0106824	0.000453158
NH4+	kg/day	0	1.05156e-21	0	2.4218e-15	0
CO2	kg/day	0	1.79119e-21	0	0.00069013	0.000935106
C5H7NO2	kg/day	0	1.07564e-20	0	0.000458688	7.93861e-09
ARGININE	kg/day	0	1.23792e-22	0	2.26278e-13	8.04842e-22
HISTIDIN	kg/day	0	1.10706e-05	0	0	0
LYSINE	kg/day	0	1.4986e-05	0	1.84661e-11	6.55378e-20
TYROSINE	kg/day	0	3.8056e-20	0	3.146e-11	4.41692e-92
TRYPTOPH	kg/day	0	1.04216e-05	0	2.5774e-11	3.61862e-92
PHENYLAL	kg/day	0	3.36499e-05	0	1.70489e-10	1.60715e-18
CYSTEINE	kg/day	0	1.70934e-05	0	1.4986e-05	1.3197e-15
METHIONI	kg/day	0	1.12328e-05	0	1.8717e-11	2.62782e-92
THREONIN	kg/day	0	1.61378e-05	0	1.51616e-11	2.12865e-92
SERINE	kg/day	0	2.02669e-05	0	5.32906e-14	7.48189e-95
LEUCINE	kg/day	0	1.18935e-05	0	1.70934e-05	2.39987e-86
ISOLEUCI	kg/day	0	3.49335e-05	0	3.04581e-13	4.27625e-94
VALINE	kg/day	0	7.79517e-06	0	5.87049e-14	8.24203e-95
GLUTAMIC	kg/day	0	2.37902e-05	0	3.51591e-13	2.0109e-21
ASPARTIC	kg/day	0	3.11832e-09	0	8.39874e-11	1.17917e-91
GLYCINE	kg/day	0	0.000222785	0	3.49335e-05	3.07556e-15
ALANINE	kg/day	0	1.90776e-22	0	7.79517e-06	1.09443e-86
PROLINE	kg/day	0	3.85511e-22	0	3.2813e-13	2.88958e-23
HYDROGEN	kg/day	0	4.5621e-05	0	3.65969e-09	4.9416e-07
METHANE	kg/day	0	1.98036e-21	0	0.000255764	0.00131953
INDOLE	kg/day	0	3.76097e-11	0	0	0
FROMAMID	kg/day	0	7.52676e-19	0	0	0
H2S	kg/day	0	0	0	2.03653e-10	5.89454e-11
CH4S	kg/day	0	0	0	0	0
BENZENE	kg/day	0	0	0	2.30816e-10	1.03732e-10
PHENOL	kg/day	0	0	0	0	0
H2CO3	kg/day	0.00529689	0.00158907	0	1.1488e-12	1.0906e-19
HCO3-	kg/day	0.00240768	0.000963071	0	0.0250776	0
CO3-2	kg/day	0	0	0	0.0102911	0
HS-	kg/day	9.63071e-05	9.63071e-06	0	0.00261543	0
CELLULOS	kg/day	9.63071e-05	9.63071e-06	0	0.00158907	2.23101e-84
HEMECELL	kg/day	0	9.12369e-07	0	0.000963071	2.42466e-12
GLUCOSE	kg/day	0	0	0	0	0
TRIOLEIN	kg/day	9.63071e-05	9.63071e-06	0	9.63071e-06	7.55295e-24
TRIPALM	kg/day	0	0.000273599	0	9.63071e-06	7.01423e-23
PALM	kg/day	0	0	0	9.12369e-07	8.64263e-15
SN-1--01	kg/day	0	3.34587e-07	0	0	0
SN-1--02	kg/day	0	0	0	9.63071e-06	6.83706e-20
XYLOSE	kg/day	0	0.0011741	0	0.000273599	2.88408e-14
FURFURAL	kg/day	0.000722303	6.42554e-05	0	0	0
LINOLEIC	kg/day	0.000433382	6.43261e-08	0	3.34587e-07	2.16801e-16
STARCH	kg/day	0	0	0	0	0
ETHANOL	kg/day	0.00264844	0.00264844	0	0.00119066	1.33342e-05
PROTEIN	kg/day	0	0	0	7.03415e-05	1.88884e-06
KERATIN	kg/day	0	0	0	0.000141588	7.51032e-05
ACETATE	kg/day	0	0	0	4.52758e-05	0
INERT	kg/day	0	0	0	0.00264844	2.89563e-19
C3H5O2-	kg/day	0	0	0	0.000857025	2.36977e-07
C5H9O2-	kg/day	0	0	0	3.04296e-08	1.58262e-12
C4H7O2-	kg/day	0	0	0	0.000716392	9.87133e-08
C18H33O2	kg/day	0	0	0	7.96498e-07	4.07389e-16
C3H6NO3-	kg/day	0	0	0	2.76664e-12	0
C5H10NO2	kg/day	0	0	0	3.57342e-12	5.017e-93
C5H8NO4-	kg/day	0	0	0	1.30571e-05	7.46919e-14
ISOLE-01	kg/day	0	0	0	1.23925e-05	1.73989e-86
PROLI-01	kg/day	0	0	0	1.16681e-05	1.02752e-15
TYROS-01	kg/day	0	0	0	6.27973e-12	1.90087e-23
TRYPT-01	kg/day	0	0	0	3.64273e-12	2.42267e-23
ARGIN-01	kg/day	0	0	0	2.06513e-09	1.12377e-11
LYSIN-01	kg/day	0	0	0	1.88654e-13	6.69662e-22
PHENY-01	kg/day	0	0	0	2.59667e-11	2.44821e-19
METHI-01	kg/day	0	0	0	3.87978e-12	5.44713e-93
THREO-01	kg/day	0	0	0	2.00159e-13	2.81018e-94
ASPAR-01	kg/day	0	0	0	2.5865e-12	3.63139e-93
C4H6NO4-	kg/day	0	0	0	2.76367e-11	3.88013e-92
C6H13N2O	kg/day	0	0	0	6.0575e-10	2.15022e-18
TYROS-02	kg/day	0	0	0	6.98665e-07	2.11486e-18
TYROS-03	kg/day	0	0	0	7.01447e-13	2.12328e-24
TRYPT-02	kg/day	0	0	0	2.51951e-10	1.67566e-21
ARGIN-02	kg/day	0	0	0	2.15747e-06	1.17402e-08
ARGIN-03	kg/day	0	0	0	4.85073e-13	2.6396e-15
PHENY-02	kg/day	0	0	0	4.10339e-06	3.86879e-14
METHI-02	kg/day	0	0	0	1.33834e-10	1.879e-91
THREO-02	kg/day	0	0	0	7.62623e-07	1.07071e-87
AMMON(S)	kg/day	0	0	0	0	0
NH4HS(S)	kg/day	0	0	0	1.93067e-08	2.71062e-89
SALT1	kg/day	0	0	0	0.000374822	5.26242e-85
S--	kg/day	0	0	0	0	0
NH2COO	kg/day	0	0	0	3.9966e-15	0
H3PO4	kg/day	0	0	0	4.8714e-14	9.53205e-30
H2PO4-	kg/day	0	0	0	7.85755e-06	0
HPO4--	kg/day	0	0	0	2.0672e-09	0
PO4---	kg/day	0	5.17781e-06	5.17781e-06	9.19288e-06	0
DIAMM-01	kg/day	0	0	0	0	0
SALT3	kg/day	0	0	0	0	0
K+	kg/day	0	0	0	3.5262e-10	0
KH2PO4	kg/day	0	0	0	0.0341044	4.78818e-83
K2HPO4	kg/day	0	1.10948e-06	1.10948e-06	0.00130665	1.83451e-84
K2CO3	kg/day	0	0	0	0	0
KHCO3	kg/day	0	0	0	0	0
K3PO4	kg/day	0	0	0	0	0
MG(OH)2	kg/day	0	1.70954e-06	1.70954e-06	0.00010211	1.4336e-85
MG++	kg/day	0	0	0	0.00518691	0
STRUVITE	kg/day	0	2.03309e-06	2.03309e-06	0	0
FE+++	kg/day	0	0	0	0	0
FE(OH)2	kg/day	0	0	0	0.00020609	2.89346e-85
FE++	kg/day	0	1.40955e-06	1.40955e-06	0.0126984	0
FE(OH)3	kg/day	0	0	0	2.02823e-06	2.84759e-87
FES	kg/day	0	0	0	0	0
FECO3	kg/day				1.3126e-19	5.21948e-96
CA(OH)2	kg/day	0.940847	0.954395	0	0.000106564	1.49613e-85
CA++	kg/day	0	5.94657e-05	0	0.00793582	0
CACO3	kg/day	0	2.89178e-06	0	0	0
HCL	kg/day	0.010009	4.0094e-06	0	2.49148e-09	2.10227e-09
CL-	kg/day	0	0.000194437	0	0.0250415	0
Mass Fractions		0	0.00367235	0
WATER		0	0.00306789	0	0.0233307	0.168177
GLYCEROL		0	8.71823e-09	0
OLEIC-AC		0	0	0		-1.35213e+08
DEXTROSE		0	0	0		-6.46743e+06
ACETI-AC		0.00010009	0.000185087	0		-56359.8
PROPI-01		0	0	0		-2695.76
ISOBU-01		0	0.00576989	0		0.0371548
ISOVA-01		0	0.0019426	0		0.776789
H+		0	6.17996e-05	0		-0.234692
OH-		0	4.45347e-21	0		20.9068
NH3		0	7.58591e-21	0		6.24859e-06
NH4+		0	4.55548e-20	0
CO2		0	5.24276e-22	0		0.00313531
C5H7NO2		0	4.68853e-05	0
ARGININE		0	6.34676e-05	0
HISTIDIN		0	1.61172e-19	0	-4.59416e+07
LYSINE		0	4.41369e-05	0	-1.93439e+06
TYROSINE		0	0.000142511	0	1.06482e+38
TRYPTOPH		0	7.23925e-05	0	4.48346e+36
PHENYLAL		0	4.75722e-05	0	28.3857
CYSTEINE		0	6.83458e-05	0	674.159
METHIONI		0	8.58328e-05	0	-8.45146
THREONIN		0	5.03707e-05	0	23.7499
SERINE		0	0.000147948	0	0.00066226
LEUCINE		0	3.30136e-05	0
ISOLEUCI		0	0.000100755	0	0.377487
VALINE		0	1.32065e-08	0	3.31059e-14	2.84318e-93
GLUTAMIC		0	0.000943523	0	0.0011343	3.96845e-10
ASPARTIC		0	8.07962e-22	0	1.81777e-12	1.56112e-91
GLYCINE		0	1.63269e-21	0	0.00011706	6.3042e-13
ALANINE		0	0.000193211	0	2.61212e-05	2.24332e-84
PROLINE		0	8.3871e-21	0	0.00109433	5.89489e-12
HYDROGEN		0	1.59282e-10	0	5.13444e-09	4.24086e-05
METHANE		0	3.18768e-18	0	0.000394655	0.124547
INDOLE		0	0	0	0	0
FROMAMID		0	0	0	0	0
H2S		0	0	0	6.53389e-10	1.12682e-08
CH4S		0	0	0	0	0
BENZENE		0.0220198	0.0067299	0	2.68663e-10	2.17367e-08
PHENOL		0.010009	0.00407873	0	0	0
H2CO3		0	0	0	4.55592e-10	2.64568e-15
HCO3-		0.00040036	4.07873e-05	0	1.02729e-08	0
CO3-2		0.00040036	4.07873e-05	0	4.86172e-18	0
HS-		0	3.864e-06	0	0.00186256	0
CELLULOS		0	0	0	0.00532487	4.57306e-82
HEMECELL		0.00040036	4.07873e-05	0	0.00322719	4.96999e-10
GLUCOSE		0	0.00115873	0	0	0
TRIOLEIN		0	0	0	3.22719e-05	1.54818e-21
TRIPALM		0	1.41702e-06	0	3.22719e-05	1.43775e-20
PALM		0	0	0	3.0573e-06	1.77154e-12
SN-1--01		0	0.00497248	0	0	0
SN-1--02		0.0030027	0.00027213	0	3.22719e-05	1.40144e-17
XYLOSE		0.00180162	2.72429e-07	0	0.000916813	5.91169e-12
FURFURAL		0	0	0	0	0
LINOLEIC		0.0110099	0.0112165	0	1.12118e-06	4.44391e-14
STARCH		0	0	0	0	0
ETHANOL		0	0	0	0.00388729	0.00375417
PROTEIN		0	0	0	0.000224068	0.000458276
KERATIN		0	0	0	6.72902e-05	0.0168007
ACETATE		0	0	0	0.000135385	0
INERT		0	0	0	0.00887478	3.45319e-16
C3H5O2-		0	0	0	0.00235915	3.99031e-05
C5H9O2-		0	0	0	2.5532e-05	8.12276e-08
C4H7O2-		0	0	0	0.00127168	1.07187e-05
C18H33O2		0	0	0	0.000232706	7.28066e-12
C3H6NO3-		0	0	0	6.04559e-06	0
C5H10NO2		0	0	0	0	0
C5H8NO4-		0	0	0	1.92427e-08	6.73336e-15
ISOLE-01		0	0	0	2.09143e-08	1.79615e-87
PROLI-01		0	0	0	1.86215e-08	1.0031e-16
TYROS-01		0	0	0	2.21037e-12	4.09275e-22
TRYPT-01		0	0	0	1.08586e-19	8.17251e-24
ARGIN-01		0	0	0	2.05634e-14	6.84486e-15
LYSIN-01		0	0	0	1.65318e-16	3.11616e-21
PHENY-01		0	0	0	8.011e-12	4.62017e-18
METHI-01		0	0	0	6.48191e-20	1.25819e-93
THREO-01		0	0	0	2.63963e-20	1.00271e-93
ASPAR-01		0	0	0	1.83255e-17	1.12142e-93
C4H6NO4-		0	0	0	4.01257e-12	3.44604e-91
C6H13N2O		0	0	0	5.98909e-08	1.30043e-14
TYROS-02		0	0	0	1.77467e-05	3.28601e-15
TYROS-03		0	0	0	2.44311e-13	4.5237e-23
TRYPT-02		0	0	0	2.01882e-14	8.21304e-24
ARGIN-02		0	0	0	2.84522e-06	9.47077e-07
ARGIN-03		0	0	0	2.17011e-16	1.34435e-16
PHENY-02		0	0	0	0.000157817	9.10176e-11
METHI-02		0	0	0	1.47499e-14	1.26674e-93
THREO-02		0	0	0	1.17752e-14	1.01127e-93
AMMON(S)		0	0	0	0	0
NH4HS(S)		0	0	0	0.000623556	5.35518e-83
SALT1		0	0	0	0	0
S--		0	0	0	0	0
NH2COO		0	0	0	0	0
H3PO4		0	0	0	0.0050514	6.0462e-17
H2PO4-		0	2.19287e-05	0.452627	0.025316	0
HPO4--		0	0	0	5.62632e-09	0
PO4---		0	0	0	1.45915e-20	0
DIAMM-01		0	0	0	0	0
SALT3		0	0	0	0	0
K+		0	4.69879e-06	0.096987	0.0114253	0
KH2PO4		0	0	0	1.82906e-17	1.15529e-93
K2HPO4		0	0	0	0	0
K2CO3		0	0	0	0	0
KHCO3		0	7.24012e-06	0.149442	0	0
K3PO4		0	0	0	0	0
MG(OH)2		0	8.61039e-06	0.177726	0	0
MG++		0	0	0	0.00583517	0
STRUVITE		0	0	0	0	0
FE+++		0	5.96961e-06	0.123218	0	0
FE(OH)2		0	0	0	0	0
FE++		0	0	0	0.0180886	0
FE(OH)3		0.013875	0.0102231	8.33333e-07	6.79649e-06	5.83691e-85
FES					0	0
FECO3		-2.31039e+08			0	0
CA(OH)2		-2.03224e+06			0	0
CA++		-764281			0.011387	0
CACO3		-6722.69			0	0
HCL		0.0411507			7.0539e-10	3.64082e-08
CL-		4.6783			0.091845	0
Volume Flow	l/hr	-0.0101447			0.01763	0.392293
Vapor Phase		113.687
Molar Enthalpy	J/kmol	1.58072e-07				-2.86689e+08
Mass Enthalpy	J/kg					-8.56976e+06
Molar Entropy	J/kmol-K	0.000431297				-17224.1
Mass Entropy	J/kg-K					-514.868
Molar Density	kmol/cum					0.0371548
Mass Density	kg/cum	-2.88077e+08	-2.83718e+08	-6.04276e+08		1.24296
Enthalpy Flow	Watt	-1.51851e+07	-1.5207e+07	-6.02956e+06		-1.16074
Average MW		-167180	-156671	1.03038e+06		33.4535
Mole Flows	kmol/hr	-8812.41	-8397.41	10281.3		1.45756e-05
Mole Fractions		52.5612	51.5819	5.70723
Mass Flows	kg/day	997.138	962.364	571.973		0.0117025
Mass Fractions		-42.2019	-41.5588	-0.000798321
Liquid Phase		18.971	18.657	100.219
Molar Enthalpy	J/kmol	0.000527383	0.000527326	4.75603e-09	-2.26448e+08
Mass Enthalpy	J/kg				-1.09269e+07
Molar Entropy	J/kmol-K	0.24012	0.23612	1.14395e-05	7.78608e+37
Mass Entropy	J/kg-K				3.75704e+36
Molar Density	kmol/cum				34.0327
Mass Density	kg/cum				705.293
Enthalpy Flow	Watt				-37.7411
Average MW					20.724
Mole Flows	kmol/hr				0.000599997
Mole Fractions
Mass Flows	kg/day				0.298424
Mass Fractions

## Sheet: Soluble P
	Units	INPUT	LIQUID	NUTRIENT	S1	S2	Formula	Molecular Mass	P molar mass fraction	P Mol Flow	soluble										Molar Mass
Description
From			B1		B4	B4
To		B2	B4	B2
Stream Class		CONVEN	CONVEN	CONVEN	CONVEN	CONVEN
Maximum Relative Error
Cost Flow	$/sec
MIXED Substream
Phase			Liquid Phase	Liquid Phase	Liquid Phase	Vapor Phase
Temperature	K	296.15	328.15	296.15	328	328
Pressure	N/sqm	101325	101325	101325	101325	101325
Molar Vapor Fraction		0.000299639	0	0	0	1
Molar Liquid Fraction		0.9997	1	1	1	0
Molar Solid Fraction		0	0	0	0	0
Mass Vapor Fraction		0.00179295	0	0	0	1
Mass Liquid Fraction		0.998207	1	1	1	1.44329e-15
Mass Solid Fraction		0	0	0	0	0
Molar Enthalpy	J/kmol	-2.8806e+08	-2.83718e+08	-6.04276e+08	-4.15427e+10	-2.10227e+08
Mass Enthalpy	J/kg	-1.51615e+07	-1.5207e+07	-6.02956e+06	-2.1962e+09	-7.74176e+06
Molar Entropy	J/kmol-K	-167359	-156671	1.03038e+06		-39940.2
Mass Entropy	J/kg-K	-8808.66	-8397.41	10281.3		-1470.82
Molar Density	kmol/cum	38.021	51.5819	5.70723	50.2494	0.0371548
Mass Density	kg/cum	722.375	962.364	571.973	950.501	1.00894
Enthalpy Flow	Watt	-42.2121	-41.5588	-0.000798321	-6118.1	-0.424266
Average MW		18.9994	18.657	100.219	18.9157	27.155
Mole Flows	mol/hr	0.527541	0.527326	4.75603e-06	0.66226	0.00624859	Alias	g/mol			non soluble										N	14
WATER	mol/hr	0.523448	0.521206	0	0.534726	0.000777908	H2O	18	0	0			P								C	12
GLYCEROL	mol/hr	0	6.35264e-06	0	6.35264e-06	2.58898e-13	C3H8O3	92	0	0			Soluble flow (mol/hr)	0.00241847							H	1
OLEIC-AC	mol/hr	0	1.00723e-07	0	8.16623e-14	4.17371e-23	C18H34O2	282	0	0			Non-Soluble flow (mol/hr)	0							O	16
DEXTROSE	mol/hr	0.000556845	2.18952e-07	0	2.18952e-07	4.20247e-20	C6H12O6	180	0	0			Soluble mol frac (%)	0.365184							S	32
ACETI-AC	mol/hr	0	3.18543e-05	0	1.96672e-14	3.56576e-17	C2H4O2	60	0	0			Non-Soluble mol frac (%)	0							Fe	56
PROPI-01	mol/hr	0	0.000487717	0	3.97804e-13	4.57917e-16	C3H6O2	74	0	0			Soluble concentration (mol/l)	0.137179							Ca	40
ISOBU-01	mol/hr	0	0.000342575	0	1.90331e-10	1.78105e-14	C4H8O2	88	0	0			Non soluble concentration (mol/l)	0							P	31
ISOVA-01	mol/hr	0	8.39815e-10	0	7.91568e-15	4.08163e-18	C5H10O2	102	0	0			pH	12.3417	12.8196						K	39
H+	mol/hr	0	0	0	8.02707e-15	0	H+	1	0	0				H+	OH-						Mg	24
OH-	mol/hr	0	0	0	0.00116377	0	OH-	17	0	0			Molar Flow	8.02707e-15	0.00116377
NH3	mol/hr	5.89058e-05	0.000106922	0	0.0261355	0.00110869	H3N	17	0	0			Volume Flow	0.01763	0.01763
NH4+	mol/hr	0	0	0	5.59404e-15	0	NH4+	18	0	0			Concentration	4.55307e-13	0.0660105	3.0055e-14
CO2	mol/hr	0	0.00128985	0	0.000653386	0.00088532	CO2	14	0	0
C5H7NO2	mol/hr	0	0.000168959	0	0.000168959	2.92421e-09	C5H7NO2	113	0	0
ARGININE	mol/hr	0	3.49022e-06	0	5.41222e-14	1.92506e-22	C6H14N4O2	174	0	0
HISTIDIN	mol/hr	0	2.84238e-22	0	0	0	C6H8N3O2	155	0	0
LYSINE	mol/hr	0	5.10521e-22	0	5.26319e-12	1.86795e-20	C6H14N2O2	146	0	0
TYROSINE	mol/hr	0	2.47354e-21	0	7.23454e-12	1.01571e-92	C9H11NO3	181	0	0
TRYPTOPH	mol/hr	0	2.5256e-23	0	5.25841e-12	7.38269e-93	C11H12N2O2	204	0	0
PHENYLAL	mol/hr	0	2.79235e-06	0	4.30028e-11	4.05373e-19	C9H11NO2	165	0	0
CYSTEINE	mol/hr	0	5.19688e-06	0	5.19688e-06	4.57649e-16	C3H6NO2S	121	0	0
METHIONI	mol/hr	0	1.06268e-20	0	5.22655e-12	7.33796e-93	C5H11NO2S	149	0	0
THREONIN	mol/hr	0	3.64534e-06	0	5.30331e-12	7.44573e-93	C4H9NO3	119	0	0
SERINE	mol/hr	0	1.33412e-05	0	2.11283e-14	2.96636e-95	C3H7NO3	105	0	0
LEUCINE	mol/hr	0	5.42957e-06	0	5.42957e-06	7.623e-87	C6H13NO2	131	0	0
ISOLEUCI	mol/hr	0	3.56801e-06	0	9.67479e-14	1.35832e-94	C6H13NO2	131	0	0
VALINE	mol/hr	0	5.73984e-06	0	2.08799e-14	2.93149e-95	C5H11NO2	117	0	0
GLUTAMIC	mol/hr	0	5.73947e-06	0	9.95687e-14	5.69477e-22	C5H9NO4	147	0	0
ASPARTIC	mol/hr	0	3.72314e-06	0	2.62913e-11	3.69124e-92	C4H7NO4	133	0	0
GLYCINE	mol/hr	0	1.93901e-05	0	1.93901e-05	1.70712e-15	C2H5NO2	75	0	0
ALANINE	mol/hr	0	3.64557e-06	0	3.64557e-06	5.1183e-87	C3H7NO2	89	0	0
PROLINE	mol/hr	0	8.60975e-06	0	1.18751e-13	1.04575e-23	C5H9NO2	115	0	0
HYDROGEN	mol/hr	0	6.44532e-08	0	7.56428e-08	1.02139e-05	H2	2	0	0
METHANE	mol/hr	0	0.000578623	0	0.000664276	0.00342711	CH4	16	0	0
INDOLE	mol/hr	0	6.78531e-23	0	0	0	C8H7N	117	0	0
FROMAMID	mol/hr	0	3.5663e-22	0	0	0	CH3NO	45	0	0
H2S	mol/hr	0	5.57738e-05	0	2.48975e-10	7.20634e-11	H2S	34	0	0
CH4S	mol/hr	0	1.71518e-21	0	0	0	CH4S	48	0	0
BENZENE	mol/hr	0	2.00614e-11	0	1.2312e-10	5.53319e-11	C6H6	78	0	0
PHENOL	mol/hr	0	3.33232e-19	0	0	0	C6H6O	94	0	0
H2CO3	mol/hr	0	0	0	7.71731e-13	7.32635e-20	H2CO3	62	0	0
HCO3-	mol/hr	0	0	0	0.0171247	0	HCO3-	61	0	0
CO3-2	mol/hr	0	0	0	0.0071455	0	CO3--	60	0	0
HS-	mol/hr	0	0	0	0.00329493	0	HS-	33	0	0
CELLULOS	mol/hr	0.00136117	0.000408352	0	0.000408352	5.73317e-85	C6H10O5	162	0	0
HEMECELL	mol/hr	0.000759331	0.000303732	0	0.000303732	7.64687e-13	C5H8O4	132	0	0
GLUCOSE	mol/hr	0	0	0	0	0	C6H12O6	180	0	0
TRIOLEIN	mol/hr	4.53207e-06	4.53207e-07	0	4.53207e-07	3.55431e-25	C57H104O6	884	0	0
TRIPALM	mol/hr	4.97567e-06	4.97567e-07	0	4.97567e-07	3.62387e-24	C51H98O6	806	0	0
PALM	mol/hr	0	1.48414e-07	0	1.48414e-07	1.40588e-15	C16H34O	242	0	0
SN-1--01	mol/hr	0	0	0	0	0	C37H70O5	594	0	0
SN-1--02	mol/hr	6.77082e-06	6.77082e-07	0	6.77082e-07	4.80676e-21	C37H68O5	592	0	0
XYLOSE	mol/hr	0	7.59331e-05	0	7.59331e-05	8.00431e-15	C5H10O5	150	0	0
FURFURAL	mol/hr	0	0	0	0	0	C5H4O2	96	0	0
LINOLEIC	mol/hr	0	4.97097e-08	0	4.97097e-08	3.22102e-17	C18H32O2	280	0	0
STARCH	mol/hr	0	0	0	0	0	C6H10O5	162	0	0
ETHANOL	mol/hr	0	0.00106191	0	0.00107688	1.206e-05	C2H6O	62	0	0
PROTEIN	mol/hr	8.19116e-05	7.28678e-06	0	7.97696e-06	2.142e-07	C13H25O7N3S	367	0	0
KERATIN	mol/hr	0.000155141	2.30273e-08	0	5.06851e-05	2.68852e-05	C(4.89)H8NO(2.1)S(0.67)	116.424	0	0
ACETATE	mol/hr	0	0	0	3.19502e-05	0	CH3COO-	59	0	0
INERT	mol/hr	0.00110352	0.00110352	0	0.00110352	1.20651e-19	INERT	x	0	0
C3H5O2-	mol/hr	0	0	0	0.000488691	1.35128e-07	C3H5O2-	73	0	0
C5H9O2-	mol/hr	0	0	0	1.25379e-08	6.52088e-13	C5H9O2-	101	0	0
C4H7O2-	mol/hr	0	0	0	0.000342712	4.72231e-08	C4H7O2-	87	0	0
C18H33O2	mol/hr	0	0	0	1.17494e-07	6.00954e-17	C18H33O2	281	0	0
C3H6NO3-	mol/hr	0	0	0	1.10751e-12	0	C3H6NO3-	104	0	0
C5H10NO2	mol/hr	0	0	0	1.28201e-12	1.79991e-93	C5H10NO2-	116	0	0
C5H8NO4-	mol/hr	0	0	0	3.7232e-06	2.12983e-14	C5H8NO4-	146	0	0
ISOLE-01	mol/hr	0	0	0	3.96688e-06	5.56941e-87	C6H12NO2-	130	0	0
PROLI-01	mol/hr	0	0	0	4.26001e-06	3.75146e-16	C5H8NO2-	114	0	0
TYROS-01	mol/hr	0	0	0	1.45216e-12	4.39569e-24	C9H10NO3-	164	0	0
TRYPT-01	mol/hr	0	0	0	7.46874e-13	4.96725e-24	C11H11N2O2-	203	0	0
ARGIN-01	mol/hr	0	0	0	4.96823e-10	2.70354e-12	C6H13N4O2-	173	0	0
LYSIN-01	mol/hr	0	0	0	5.41432e-14	1.92191e-22	C6H13N2O2-	145	0	0
PHENY-01	mol/hr	0	0	0	6.58983e-12	6.21308e-20	C9H10NO2-	164	0	0
METHI-01	mol/hr	0	0	0	1.09076e-12	1.53141e-93	C5H10NO2S-	148	0	0
THREO-01	mol/hr	0	0	0	7.06102e-14	9.91351e-95	C4H8NO3-	118	0	0
ASPAR-01	mol/hr	0	0	0	8.15852e-13	1.14544e-93	C4H6NO4-	132	0	0
C4H6NO4-	mol/hr	0	0	0	8.65134e-12	1.21463e-92	C4H6NO4-	132	0	0
C6H13N2O	mol/hr	0	0	0	1.7265e-10	6.12852e-19	C6H13N2O2-	145	0	0
TYROS-02	mol/hr	0	0	0	1.60665e-07	4.86332e-19	C9H10NO3-	164	0	0
TYROS-03	mol/hr	0	0	0	1.61304e-13	4.88268e-25	C9H10NO3-	164	0	0
TRYPT-02	mol/hr	0	0	0	5.14031e-11	3.41867e-22	C11H11N2O2-	173	0	0
ARGIN-02	mol/hr	0	0	0	5.16033e-07	2.80807e-09	C6H13N4O2-	173	0	0
ARGIN-03	mol/hr	0	0	0	1.16022e-13	6.31351e-16	C6H13N4O2-	173	0	0
PHENY-02	mol/hr	0	0	0	1.03501e-06	9.75833e-15	C9H10NO2-	164	0	0
METHI-02	mol/hr	0	0	0	3.73719e-11	5.24693e-92	C5H10NO2S-	148	0	0
THREO-02	mol/hr	0	0	0	2.66755e-07	3.74518e-88	C4H8NO3	118	0	0
AMMON(S)	mol/hr	0	0	0	0	0	NH2COONH4	78	0	0
NH4HS(S)	mol/hr	0	0	0	1.57387e-08	2.20968e-89	NH4HS	51	0	0
SALT1	mol/hr	0	0	0	0.000197552	2.77358e-85	NH4HCO3	79	0	0
S--	mol/hr	0	0	0	0	0	S-2	32	0	0
NH2COO	mol/hr	0	0	0	2.77389e-15	0	NH2COO-	230	0	0
H3PO4	mol/hr	0	0	0	2.07128e-14	4.05294e-30	H3PO4	98	0.316327	6.552e-15
H2PO4-	mol/hr	0	0	0	3.37566e-06	0	H2PO4-	97	0.319588	1.07882e-06
HPO4--	mol/hr	0	0	0	8.97405e-10	0	HPO4-2	96	0.322917	2.89787e-10
PO4---	mol/hr	0	0	0	4.03311e-06	0	PO4-3	95	0.326316	1.31607e-06
DIAMM-01	mol/hr	0	0	0	0	0	(NH4)2HPO4	132	0.234848	0
SALT3	mol/hr	0	0	0	0	0	NH6PO4	115	0.269565	0
K+	mol/hr	0	0	0	3.75789e-10	0	K+	39	0	0
KH2PO4	mol/hr	0	1.58534e-06	1.58534e-06	0.0104421	1.46605e-83	KH2PO4	136	0.227941	0.00238018
K2HPO4	mol/hr	0	0	0	0.00031258	4.38855e-85	K2HPO4	270	0.114815	3.58888e-05
K2CO3	mol/hr	0	0	0	0	0	K2CO3	138	0	0
KHCO3	mol/hr	0	0	0	0	0	KHCO3	100	0	0
K3PO4	mol/hr	0	0	0	0	0	K3PO4	249	0.124498	0
MG(OH)2	mol/hr	0	7.92671e-07	7.92671e-07	7.29526e-05	1.02424e-85	MG(OH)2	58	0	0
MG++	mol/hr	0	0	0	0.00889245	0	MG+2	24	0	0
STRUVITE	mol/hr	0	0	0	0	0	NH4MgPO4.6H2O	245	0.126531	0
FE+++	mol/hr	0	0	0	0	0	FE+3	56	0	0
FE(OH)2	mol/hr	0	7.92671e-07	7.92671e-07	9.55588e-05	1.34162e-85	FE(OH)2	90	0	0
FE++	mol/hr	0	0	0	0.00947431	0	FE+2	56	0	0
FE(OH)3	mol/hr	0	7.92671e-07	7.92671e-07	7.90778e-07	1.11024e-87	FE(OH)3	107	0	0
FES	mol/hr	0	0	0	0	0	FES	88	0	0
FECO3	mol/hr	0	0	0	4.72066e-20	1.87714e-96	FECO3	116	0	0
CA(OH)2	mol/hr	0	7.92671e-07	7.92671e-07	5.9927e-05	8.41362e-86	CA(OH)2	74	0	0
CA++	mol/hr	0	0	0	0.00825062	0	CA+2	40	0	0
CACO3	mol/hr	0	0	0	0	0	CACO3	100	0	0
HCL	mol/hr				2.84722e-09	2.40244e-09
CL-	mol/hr	0.992241	0.988393	0	0.0294301	0
Mole Fractions		0	1.20469e-05	0
WATER		0	1.91008e-07	0	0.807426	0.124493
GLYCEROL		0.00105555	4.15211e-07	0	9.59237e-06	4.14331e-11
OLEIC-AC		0	6.04073e-05	0	1.23309e-13	6.67944e-21
DEXTROSE		0	0.000924887	0	3.30614e-07	6.72548e-18
ACETI-AC		0	0.000649644	0	2.9697e-14	5.7065e-15
PROPI-01		0	1.59259e-09	0	6.00677e-13	7.32833e-14
ISOBU-01		0	0	0	2.87396e-10	2.85032e-12
ISOVA-01		0	0	0	1.19525e-14	6.53208e-16
H+		0.000111661	0.000202763	0	1.21207e-14	0
OH-		0	0	0	0.00175727	0
NH3		0	0.00244602	0	0.0394641	0.17743
NH4+		0	0.000320406	0	8.4469e-15	0
CO2		0	6.6187e-06	0	0.000986601	0.141683
C5H7NO2		0	5.39017e-22	0	0.000255125	4.6798e-07
ARGININE		0	9.68131e-22	0	8.17236e-14	3.08079e-20
HISTIDIN		0	4.69072e-21	0	0	0
LYSINE		0	4.78945e-23	0	7.94732e-12	2.98939e-18
TYROSINE		0	5.2953e-06	0	1.0924e-11	1.62551e-90
TRYPTOPH		0	9.85514e-06	0	7.9401e-12	1.1815e-90
PHENYLAL		0	2.01522e-20	0	6.49334e-11	6.48744e-17
CYSTEINE		0	6.91287e-06	0	7.84719e-06	7.32404e-14
METHIONI		0	2.52998e-05	0	7.89199e-12	1.17434e-90
THREONIN		0	1.02964e-05	0	8.00791e-12	1.19159e-90
SERINE		0	6.76622e-06	0	3.19033e-14	4.74725e-93
LEUCINE		0	1.08848e-05	0	8.19856e-06	1.21996e-84
ISOLEUCI		0	1.08841e-05	0	1.46087e-13	2.1738e-92
VALINE		0	7.0604e-06	0	3.15283e-14	4.69145e-93
GLUTAMIC		0	3.67706e-05	0	1.50347e-13	9.11369e-20
ASPARTIC		0	6.91331e-06	0	3.96994e-11	5.90732e-90
GLYCINE		0	1.63272e-05	0	2.92787e-05	2.732e-13
ALANINE		0	1.22226e-07	0	5.50475e-06	8.19113e-85
PROLINE		0	0.00109728	0	1.79312e-13	1.67358e-21
HYDROGEN		0	1.28674e-22	0	1.14219e-07	0.00163459
METHANE		0	6.76299e-22	0	0.00100304	0.548461
INDOLE		0	0.000105767	0	0	0
FROMAMID		0	3.2526e-21	0	0	0
H2S		0	3.80436e-11	0	3.75948e-10	1.15328e-08
CH4S		0	6.31928e-19	0	0	0
BENZENE		0	0	0	1.85909e-10	8.85511e-09
PHENOL		0	0	0	0	0
H2CO3		0	0	0	1.1653e-12	1.17248e-17
HCO3-		0	0	0	0.025858	0
CO3-2		0.00258022	0.000774381	0	0.0107896	0
HS-		0.00143938	0.000575985	0	0.00497529	0
CELLULOS		0	0	0	0.000616603	9.17514e-83
HEMECELL		8.59094e-06	8.59444e-07	0	0.00045863	1.22378e-10
GLUCOSE		9.4318e-06	9.43565e-07	0	0	0
TRIOLEIN		0	2.81445e-07	0	6.84335e-07	5.68818e-23
TRIPALM		0	0	0	7.51317e-07	5.79951e-22
PALM		1.28347e-05	1.28399e-06	0	2.24102e-07	2.24992e-13
SN-1--01		0	0.000143996	0	0	0
SN-1--02		0	0	0	1.02238e-06	7.69255e-19
XYLOSE		0	9.42674e-08	0	0.000114658	1.28098e-12
FURFURAL		0	0	0	0	0
LINOLEIC		0	0.00201375	0	7.50608e-08	5.15479e-15
STARCH		0.00015527	1.38183e-05	0	0	0
ETHANOL		0.000294082	4.36679e-08	0	0.00162607	0.00193004
PROTEIN		0	0	0	1.20451e-05	3.42798e-05
KERATIN		0.00209181	0.00209267	0	7.65336e-05	0.0043026
ACETATE		0	0	0	4.82443e-05	0
INERT		0	0	0	0.00166629	1.93086e-17
C3H5O2-		0	0	0	0.000737914	2.16254e-05
C5H9O2-		0	0	0	1.8932e-08	1.04358e-10
C4H7O2-		0	0	0	0.000517489	7.55741e-06
C18H33O2		0	0	0	1.77414e-07	9.61744e-15
C3H6NO3-		0	0	0	1.67232e-12	0
C5H10NO2		0	0	0	1.93581e-12	2.88051e-91
C5H8NO4-		0	0	0	5.62197e-06	3.40849e-12
ISOLE-01		0	0	0	5.98992e-06	8.91307e-85
PROLI-01		0	0	0	6.43254e-06	6.0037e-14
TYROS-01		0	0	0	2.19274e-12	7.03469e-22
TRYPT-01		0	0	0	1.12777e-12	7.94939e-22
ARGIN-01		0	0	0	7.50193e-10	4.32664e-10
LYSIN-01		0	0	0	8.17552e-14	3.07575e-20
PHENY-01		0	0	0	9.95052e-12	9.94318e-18
METHI-01		0	0	0	1.64703e-12	2.45081e-91
THREO-01		0	0	0	1.0662e-13	1.58652e-92
ASPAR-01		0	0	0	1.23192e-12	1.83312e-91
C4H6NO4-		0	0	0	1.30634e-11	1.94385e-90
C6H13N2O		0	0	0	2.60698e-10	9.80785e-17
TYROS-02		0	0	0	2.42601e-07	7.78307e-17
TYROS-03		0	0	0	2.43567e-13	7.81405e-23
TRYPT-02		0	0	0	7.76177e-11	5.47111e-20
ARGIN-02		0	0	0	7.79201e-07	4.49393e-07
ARGIN-03		0	0	0	1.75191e-13	1.01039e-13
PHENY-02		0	0	0	1.56284e-06	1.56169e-12
METHI-02		0	0	0	5.64309e-11	8.39699e-90
THREO-02		0	0	0	4.02795e-07	5.99364e-86
AMMON(S)		0	0	0	0	0
NH4HS(S)		0	0	0	2.37652e-08	3.53629e-87
SALT1		0	0	0	0.0002983	4.43874e-83
S--		0	0	0	0	0
NH2COO		0	0	0	4.18852e-15	0
H3PO4		0	0	0	3.12759e-14	6.48618e-28
H2PO4-		0	0	0	5.09719e-06	0
HPO4--		0	0	0	1.35507e-09	0
PO4---		0	0	0	6.08992e-06	0
DIAMM-01		0	0	0	0	0
SALT3		0	3.00638e-06	0.333333	0	0
K+		0	0	0	5.67434e-10	0
KH2PO4		0	0	0	0.0157674	2.3462e-81
K2HPO4		0	0	0	0.00047199	7.02327e-83
K2CO3		0	0	0	0	0
KHCO3		0	1.50319e-06	0.166667	0	0
K3PO4		0	0	0	0	0
MG(OH)2		0	0	0	0.000110157	1.63915e-83
MG++		0	0	0	0.0134274	0
STRUVITE		0	1.50319e-06	0.166667	0	0
FE+++		0	0	0	0	0
FE(OH)2		0	1.50319e-06	0.166667	0.000144292	2.14709e-83
FE++		0	0	0	0.014306	0
FE(OH)3		0	0	0	1.19406e-06	1.77678e-85
FES		0	1.50319e-06	0.166667	0	0
FECO3		0	0	0	7.12811e-20	3.00411e-94
CA(OH)2		0	0	0	9.04887e-05	1.34648e-83
CA++		0.240551	0.23612	1.14395e-05	0.0124583	0
CACO3		0.226322	0.225352	0	0	0
HCL		0	1.40411e-05	0	4.29926e-09	3.84478e-07
CL-		0	6.82808e-07	0	0.044439	0
Mass Flows	kg/day	0.00240768	9.46701e-07	0	0.377487	0.00313531
WATER	kg/day	0	4.59104e-05	0	0.231198	0.000336341
GLYCEROL	kg/day	0	0.000867116	0	1.40411e-05	5.72236e-13
OLEIC-AC	kg/day	0	0.000724392	0	5.53592e-13	2.82937e-22
DEXTROSE	kg/day	0	2.05855e-09	0	9.46701e-07	1.81706e-19
ACETI-AC	kg/day	0	0	0	2.83455e-14	5.13919e-17
PROPI-01	kg/day	0	0	0	7.07258e-13	8.14134e-16
ISOBU-01	kg/day	2.40768e-05	4.37027e-05	0	4.02464e-10	3.76612e-14
ISOVA-01	kg/day	0	0	0	1.94029e-14	1.00049e-17
H+	kg/day	0	0.00136239	0	1.9265e-16	0
OH-	kg/day	0	0.000458687	0	0.000475022	0
NH3	kg/day	0	1.45921e-05	0	0.0106824	0.000453158
NH4+	kg/day	0	1.05156e-21	0	2.4218e-15	0
CO2	kg/day	0	1.79119e-21	0	0.00069013	0.000935106
C5H7NO2	kg/day	0	1.07564e-20	0	0.000458688	7.93861e-09
ARGININE	kg/day	0	1.23792e-22	0	2.26278e-13	8.04842e-22
HISTIDIN	kg/day	0	1.10706e-05	0	0	0
LYSINE	kg/day	0	1.4986e-05	0	1.84661e-11	6.55378e-20
TYROSINE	kg/day	0	3.8056e-20	0	3.146e-11	4.41692e-92
TRYPTOPH	kg/day	0	1.04216e-05	0	2.5774e-11	3.61862e-92
PHENYLAL	kg/day	0	3.36499e-05	0	1.70489e-10	1.60715e-18
CYSTEINE	kg/day	0	1.70934e-05	0	1.4986e-05	1.3197e-15
METHIONI	kg/day	0	1.12328e-05	0	1.8717e-11	2.62782e-92
THREONIN	kg/day	0	1.61378e-05	0	1.51616e-11	2.12865e-92
SERINE	kg/day	0	2.02669e-05	0	5.32906e-14	7.48189e-95
LEUCINE	kg/day	0	1.18935e-05	0	1.70934e-05	2.39987e-86
ISOLEUCI	kg/day	0	3.49335e-05	0	3.04581e-13	4.27625e-94
VALINE	kg/day	0	7.79517e-06	0	5.87049e-14	8.24203e-95
GLUTAMIC	kg/day	0	2.37902e-05	0	3.51591e-13	2.0109e-21
ASPARTIC	kg/day	0	3.11832e-09	0	8.39874e-11	1.17917e-91
GLYCINE	kg/day	0	0.000222785	0	3.49335e-05	3.07556e-15
ALANINE	kg/day	0	1.90776e-22	0	7.79517e-06	1.09443e-86
PROLINE	kg/day	0	3.85511e-22	0	3.2813e-13	2.88958e-23
HYDROGEN	kg/day	0	4.5621e-05	0	3.65969e-09	4.9416e-07
METHANE	kg/day	0	1.98036e-21	0	0.000255764	0.00131953
INDOLE	kg/day	0	3.76097e-11	0	0	0
FROMAMID	kg/day	0	7.52676e-19	0	0	0
H2S	kg/day	0	0	0	2.03653e-10	5.89454e-11
CH4S	kg/day	0	0	0	0	0
BENZENE	kg/day	0	0	0	2.30816e-10	1.03732e-10
PHENOL	kg/day	0	0	0	0	0
H2CO3	kg/day	0.00529689	0.00158907	0	1.1488e-12	1.0906e-19
HCO3-	kg/day	0.00240768	0.000963071	0	0.0250776	0
CO3-2	kg/day	0	0	0	0.0102911	0
HS-	kg/day	9.63071e-05	9.63071e-06	0	0.00261543	0
CELLULOS	kg/day	9.63071e-05	9.63071e-06	0	0.00158907	2.23101e-84
HEMECELL	kg/day	0	9.12369e-07	0	0.000963071	2.42466e-12
GLUCOSE	kg/day	0	0	0	0	0
TRIOLEIN	kg/day	9.63071e-05	9.63071e-06	0	9.63071e-06	7.55295e-24
TRIPALM	kg/day	0	0.000273599	0	9.63071e-06	7.01423e-23
PALM	kg/day	0	0	0	9.12369e-07	8.64263e-15
SN-1--01	kg/day	0	3.34587e-07	0	0	0
SN-1--02	kg/day	0	0	0	9.63071e-06	6.83706e-20
XYLOSE	kg/day	0	0.0011741	0	0.000273599	2.88408e-14
FURFURAL	kg/day	0.000722303	6.42554e-05	0	0	0
LINOLEIC	kg/day	0.000433382	6.43261e-08	0	3.34587e-07	2.16801e-16
STARCH	kg/day	0	0	0	0	0
ETHANOL	kg/day	0.00264844	0.00264844	0	0.00119066	1.33342e-05
PROTEIN	kg/day	0	0	0	7.03415e-05	1.88884e-06
KERATIN	kg/day	0	0	0	0.000141588	7.51032e-05
ACETATE	kg/day	0	0	0	4.52758e-05	0
INERT	kg/day	0	0	0	0.00264844	2.89563e-19
C3H5O2-	kg/day	0	0	0	0.000857025	2.36977e-07
C5H9O2-	kg/day	0	0	0	3.04296e-08	1.58262e-12
C4H7O2-	kg/day	0	0	0	0.000716392	9.87133e-08
C18H33O2	kg/day	0	0	0	7.96498e-07	4.07389e-16
C3H6NO3-	kg/day	0	0	0	2.76664e-12	0
C5H10NO2	kg/day	0	0	0	3.57342e-12	5.017e-93
C5H8NO4-	kg/day	0	0	0	1.30571e-05	7.46919e-14
ISOLE-01	kg/day	0	0	0	1.23925e-05	1.73989e-86
PROLI-01	kg/day	0	0	0	1.16681e-05	1.02752e-15
TYROS-01	kg/day	0	0	0	6.27973e-12	1.90087e-23
TRYPT-01	kg/day	0	0	0	3.64273e-12	2.42267e-23
ARGIN-01	kg/day	0	0	0	2.06513e-09	1.12377e-11
LYSIN-01	kg/day	0	0	0	1.88654e-13	6.69662e-22
PHENY-01	kg/day	0	0	0	2.59667e-11	2.44821e-19
METHI-01	kg/day	0	0	0	3.87978e-12	5.44713e-93
THREO-01	kg/day	0	0	0	2.00159e-13	2.81018e-94
ASPAR-01	kg/day	0	0	0	2.5865e-12	3.63139e-93
C4H6NO4-	kg/day	0	0	0	2.76367e-11	3.88013e-92
C6H13N2O	kg/day	0	0	0	6.0575e-10	2.15022e-18
TYROS-02	kg/day	0	0	0	6.98665e-07	2.11486e-18
TYROS-03	kg/day	0	0	0	7.01447e-13	2.12328e-24
TRYPT-02	kg/day	0	0	0	2.51951e-10	1.67566e-21
ARGIN-02	kg/day	0	0	0	2.15747e-06	1.17402e-08
ARGIN-03	kg/day	0	0	0	4.85073e-13	2.6396e-15
PHENY-02	kg/day	0	0	0	4.10339e-06	3.86879e-14
METHI-02	kg/day	0	0	0	1.33834e-10	1.879e-91
THREO-02	kg/day	0	0	0	7.62623e-07	1.07071e-87
AMMON(S)	kg/day	0	0	0	0	0
NH4HS(S)	kg/day	0	0	0	1.93067e-08	2.71062e-89
SALT1	kg/day	0	0	0	0.000374822	5.26242e-85
S--	kg/day	0	0	0	0	0
NH2COO	kg/day	0	0	0	3.9966e-15	0
H3PO4	kg/day	0	0	0	4.8714e-14	9.53205e-30
H2PO4-	kg/day	0	0	0	7.85755e-06	0
HPO4--	kg/day	0	0	0	2.0672e-09	0
PO4---	kg/day	0	5.17781e-06	5.17781e-06	9.19288e-06	0
DIAMM-01	kg/day	0	0	0	0	0
SALT3	kg/day	0	0	0	0	0
K+	kg/day	0	0	0	3.5262e-10	0
KH2PO4	kg/day	0	0	0	0.0341044	4.78818e-83
K2HPO4	kg/day	0	1.10948e-06	1.10948e-06	0.00130665	1.83451e-84
K2CO3	kg/day	0	0	0	0	0
KHCO3	kg/day	0	0	0	0	0
K3PO4	kg/day	0	0	0	0	0
MG(OH)2	kg/day	0	1.70954e-06	1.70954e-06	0.00010211	1.4336e-85
MG++	kg/day	0	0	0	0.00518691	0
STRUVITE	kg/day	0	2.03309e-06	2.03309e-06	0	0
FE+++	kg/day	0	0	0	0	0
FE(OH)2	kg/day	0	0	0	0.00020609	2.89346e-85
FE++	kg/day	0	1.40955e-06	1.40955e-06	0.0126984	0
FE(OH)3	kg/day	0	0	0	2.02823e-06	2.84759e-87
FES	kg/day	0	0	0	0	0
FECO3	kg/day				1.3126e-19	5.21948e-96
CA(OH)2	kg/day	0.940847	0.954395	0	0.000106564	1.49613e-85
CA++	kg/day	0	5.94657e-05	0	0.00793582	0
CACO3	kg/day	0	2.89178e-06	0	0	0
HCL	kg/day	0.010009	4.0094e-06	0	2.49148e-09	2.10227e-09
CL-	kg/day	0	0.000194437	0	0.0250415	0
Mass Fractions		0	0.00367235	0
WATER		0	0.00306789	0	0.0233307	0.168177
GLYCEROL		0	8.71823e-09	0
OLEIC-AC		0	0	0		-1.35213e+08
DEXTROSE		0	0	0		-6.46743e+06
ACETI-AC		0.00010009	0.000185087	0		-56359.8
PROPI-01		0	0	0		-2695.76
ISOBU-01		0	0.00576989	0		0.0371548
ISOVA-01		0	0.0019426	0		0.776789
H+		0	6.17996e-05	0		-0.234692
OH-		0	4.45347e-21	0		20.9068
NH3		0	7.58591e-21	0		6.24859e-06
NH4+		0	4.55548e-20	0
CO2		0	5.24276e-22	0		0.00313531
C5H7NO2		0	4.68853e-05	0
ARGININE		0	6.34676e-05	0
HISTIDIN		0	1.61172e-19	0	-4.59416e+07
LYSINE		0	4.41369e-05	0	-1.93439e+06
TYROSINE		0	0.000142511	0	1.06482e+38
TRYPTOPH		0	7.23925e-05	0	4.48346e+36
PHENYLAL		0	4.75722e-05	0	28.3857
CYSTEINE		0	6.83458e-05	0	674.159
METHIONI		0	8.58328e-05	0	-8.45146
THREONIN		0	5.03707e-05	0	23.7499
SERINE		0	0.000147948	0	0.00066226
LEUCINE		0	3.30136e-05	0
ISOLEUCI		0	0.000100755	0	0.377487
VALINE		0	1.32065e-08	0	3.31059e-14	2.84318e-93
GLUTAMIC		0	0.000943523	0	0.0011343	3.96845e-10
ASPARTIC		0	8.07962e-22	0	1.81777e-12	1.56112e-91
GLYCINE		0	1.63269e-21	0	0.00011706	6.3042e-13
ALANINE		0	0.000193211	0	2.61212e-05	2.24332e-84
PROLINE		0	8.3871e-21	0	0.00109433	5.89489e-12
HYDROGEN		0	1.59282e-10	0	5.13444e-09	4.24086e-05
METHANE		0	3.18768e-18	0	0.000394655	0.124547
INDOLE		0	0	0	0	0
FROMAMID		0	0	0	0	0
H2S		0	0	0	6.53389e-10	1.12682e-08
CH4S		0	0	0	0	0
BENZENE		0.0220198	0.0067299	0	2.68663e-10	2.17367e-08
PHENOL		0.010009	0.00407873	0	0	0
H2CO3		0	0	0	4.55592e-10	2.64568e-15
HCO3-		0.00040036	4.07873e-05	0	1.02729e-08	0
CO3-2		0.00040036	4.07873e-05	0	4.86172e-18	0
HS-		0	3.864e-06	0	0.00186256	0
CELLULOS		0	0	0	0.00532487	4.57306e-82
HEMECELL		0.00040036	4.07873e-05	0	0.00322719	4.96999e-10
GLUCOSE		0	0.00115873	0	0	0
TRIOLEIN		0	0	0	3.22719e-05	1.54818e-21
TRIPALM		0	1.41702e-06	0	3.22719e-05	1.43775e-20
PALM		0	0	0	3.0573e-06	1.77154e-12
SN-1--01		0	0.00497248	0	0	0
SN-1--02		0.0030027	0.00027213	0	3.22719e-05	1.40144e-17
XYLOSE		0.00180162	2.72429e-07	0	0.000916813	5.91169e-12
FURFURAL		0	0	0	0	0
LINOLEIC		0.0110099	0.0112165	0	1.12118e-06	4.44391e-14
STARCH		0	0	0	0	0
ETHANOL		0	0	0	0.00388729	0.00375417
PROTEIN		0	0	0	0.000224068	0.000458276
KERATIN		0	0	0	6.72902e-05	0.0168007
ACETATE		0	0	0	0.000135385	0
INERT		0	0	0	0.00887478	3.45319e-16
C3H5O2-		0	0	0	0.00235915	3.99031e-05
C5H9O2-		0	0	0	2.5532e-05	8.12276e-08
C4H7O2-		0	0	0	0.00127168	1.07187e-05
C18H33O2		0	0	0	0.000232706	7.28066e-12
C3H6NO3-		0	0	0	6.04559e-06	0
C5H10NO2		0	0	0	0	0
C5H8NO4-		0	0	0	1.92427e-08	6.73336e-15
ISOLE-01		0	0	0	2.09143e-08	1.79615e-87
PROLI-01		0	0	0	1.86215e-08	1.0031e-16
TYROS-01		0	0	0	2.21037e-12	4.09275e-22
TRYPT-01		0	0	0	1.08586e-19	8.17251e-24
ARGIN-01		0	0	0	2.05634e-14	6.84486e-15
LYSIN-01		0	0	0	1.65318e-16	3.11616e-21
PHENY-01		0	0	0	8.011e-12	4.62017e-18
METHI-01		0	0	0	6.48191e-20	1.25819e-93
THREO-01		0	0	0	2.63963e-20	1.00271e-93
ASPAR-01		0	0	0	1.83255e-17	1.12142e-93
C4H6NO4-		0	0	0	4.01257e-12	3.44604e-91
C6H13N2O		0	0	0	5.98909e-08	1.30043e-14
TYROS-02		0	0	0	1.77467e-05	3.28601e-15
TYROS-03		0	0	0	2.44311e-13	4.5237e-23
TRYPT-02		0	0	0	2.01882e-14	8.21304e-24
ARGIN-02		0	0	0	2.84522e-06	9.47077e-07
ARGIN-03		0	0	0	2.17011e-16	1.34435e-16
PHENY-02		0	0	0	0.000157817	9.10176e-11
METHI-02		0	0	0	1.47499e-14	1.26674e-93
THREO-02		0	0	0	1.17752e-14	1.01127e-93
AMMON(S)		0	0	0	0	0
NH4HS(S)		0	0	0	0.000623556	5.35518e-83
SALT1		0	0	0	0	0
S--		0	0	0	0	0
NH2COO		0	0	0	0	0
H3PO4		0	0	0	0.0050514	6.0462e-17
H2PO4-		0	2.19287e-05	0.452627	0.025316	0
HPO4--		0	0	0	5.62632e-09	0
PO4---		0	0	0	1.45915e-20	0
DIAMM-01		0	0	0	0	0
SALT3		0	0	0	0	0
K+		0	4.69879e-06	0.096987	0.0114253	0
KH2PO4		0	0	0	1.82906e-17	1.15529e-93
K2HPO4		0	0	0	0	0
K2CO3		0	0	0	0	0
KHCO3		0	7.24012e-06	0.149442	0	0
K3PO4		0	0	0	0	0
MG(OH)2		0	8.61039e-06	0.177726	0	0
MG++		0	0	0	0.00583517	0
STRUVITE		0	0	0	0	0
FE+++		0	5.96961e-06	0.123218	0	0
FE(OH)2		0	0	0	0	0
FE++		0	0	0	0.0180886	0
FE(OH)3		0.013875	0.0102231	8.33333e-07	6.79649e-06	5.83691e-85
FES					0	0
FECO3		-2.31039e+08			0	0
CA(OH)2		-2.03224e+06			0	0
CA++		-764281			0.011387	0
CACO3		-6722.69			0	0
HCL		0.0411507			7.0539e-10	3.64082e-08
CL-		4.6783			0.091845	0
Volume Flow	l/hr	-0.0101447			0.01763	0.392293
Vapor Phase		113.687
Molar Enthalpy	J/kmol	1.58072e-07				-2.86689e+08
Mass Enthalpy	J/kg					-8.56976e+06
Molar Entropy	J/kmol-K	0.000431297				-17224.1
Mass Entropy	J/kg-K					-514.868
Molar Density	kmol/cum					0.0371548
Mass Density	kg/cum	-2.88077e+08	-2.83718e+08	-6.04276e+08		1.24296
Enthalpy Flow	Watt	-1.51851e+07	-1.5207e+07	-6.02956e+06		-1.16074
Average MW		-167180	-156671	1.03038e+06		33.4535
Mole Flows	kmol/hr	-8812.41	-8397.41	10281.3		1.45756e-05
Mole Fractions		52.5612	51.5819	5.70723
Mass Flows	kg/day	997.138	962.364	571.973		0.0117025
Mass Fractions		-42.2019	-41.5588	-0.000798321
Liquid Phase		18.971	18.657	100.219
Molar Enthalpy	J/kmol	0.000527383	0.000527326	4.75603e-09	-2.26448e+08
Mass Enthalpy	J/kg				-1.09269e+07
Molar Entropy	J/kmol-K	0.24012	0.23612	1.14395e-05	7.78608e+37
Mass Entropy	J/kg-K				3.75704e+36
Molar Density	kmol/cum				34.0327
Mass Density	kg/cum				705.293
Enthalpy Flow	Watt				-37.7411
Average MW					20.724
Mole Flows	kmol/hr				0.000599997
Mole Fractions
Mass Flows	kg/day				0.298424
Mass Fractions

## Sheet: Soluble Mg
	Units	INPUT	LIQUID	NUTRIENT	S1	S2	Formula	Molecular Mass	Mg molar mass fraction	Mg Mol Flow	soluble										Molar Mass
Description
From			B1		B4	B4
To		B2	B4	B2
Stream Class		CONVEN	CONVEN	CONVEN	CONVEN	CONVEN
Maximum Relative Error
Cost Flow	$/sec
MIXED Substream
Phase			Liquid Phase	Liquid Phase	Liquid Phase	Vapor Phase
Temperature	K	296.15	328.15	296.15	328	328
Pressure	N/sqm	101325	101325	101325	101325	101325
Molar Vapor Fraction		0.000299639	0	0	0	1
Molar Liquid Fraction		0.9997	1	1	1	0
Molar Solid Fraction		0	0	0	0	0
Mass Vapor Fraction		0.00179295	0	0	0	1
Mass Liquid Fraction		0.998207	1	1	1	1.44329e-15
Mass Solid Fraction		0	0	0	0	0
Molar Enthalpy	J/kmol	-2.8806e+08	-2.83718e+08	-6.04276e+08	-4.15427e+10	-2.10227e+08
Mass Enthalpy	J/kg	-1.51615e+07	-1.5207e+07	-6.02956e+06	-2.1962e+09	-7.74176e+06
Molar Entropy	J/kmol-K	-167359	-156671	1.03038e+06		-39940.2
Mass Entropy	J/kg-K	-8808.66	-8397.41	10281.3		-1470.82
Molar Density	kmol/cum	38.021	51.5819	5.70723	50.2494	0.0371548
Mass Density	kg/cum	722.375	962.364	571.973	950.501	1.00894
Enthalpy Flow	Watt	-42.2121	-41.5588	-0.000798321	-6118.1	-0.424266
Average MW		18.9994	18.657	100.219	18.9157	27.155
Mole Flows	mol/hr	0.527541	0.527326	4.75603e-06	0.66226	0.00624859	Alias	g/mol			non soluble										N	14
WATER	mol/hr	0.523448	0.521206	0	0.534726	0.000777908	H2O	18	0	0			P								C	12
GLYCEROL	mol/hr	0	6.35264e-06	0	6.35264e-06	2.58898e-13	C3H8O3	92	0	0			Soluble flow (mol/hr)	0.00892264							H	1
OLEIC-AC	mol/hr	0	1.00723e-07	0	8.16623e-14	4.17371e-23	C18H34O2	282	0	0			Non-Soluble flow (mol/hr)	0							O	16
DEXTROSE	mol/hr	0.000556845	2.18952e-07	0	2.18952e-07	4.20247e-20	C6H12O6	180	0	0			Soluble mol frac (%)	1.3473							S	32
ACETI-AC	mol/hr	0	3.18543e-05	0	1.96672e-14	3.56576e-17	C2H4O2	60	0	0			Non-Soluble mol frac (%)	0							Fe	56
PROPI-01	mol/hr	0	0.000487717	0	3.97804e-13	4.57917e-16	C3H6O2	74	0	0			Soluble concentration (mol/l)	0.506105							Ca	40
ISOBU-01	mol/hr	0	0.000342575	0	1.90331e-10	1.78105e-14	C4H8O2	88	0	0			Non soluble concentration (mol/l)	0							P	31
ISOVA-01	mol/hr	0	8.39815e-10	0	7.91568e-15	4.08163e-18	C5H10O2	102	0	0			pH	12.3417	12.8196						K	39
H+	mol/hr	0	0	0	8.02707e-15	0	H+	1	0	0				H+	OH-						Mg	24
OH-	mol/hr	0	0	0	0.00116377	0	OH-	17	0	0			Molar Flow	8.02707e-15	0.00116377
NH3	mol/hr	5.89058e-05	0.000106922	0	0.0261355	0.00110869	H3N	17	0	0			Volume Flow	0.01763	0.01763
NH4+	mol/hr	0	0	0	5.59404e-15	0	NH4+	18	0	0			Concentration	4.55307e-13	0.0660105	3.0055e-14
CO2	mol/hr	0	0.00128985	0	0.000653386	0.00088532	CO2	14	0	0
C5H7NO2	mol/hr	0	0.000168959	0	0.000168959	2.92421e-09	C5H7NO2	113	0	0
ARGININE	mol/hr	0	3.49022e-06	0	5.41222e-14	1.92506e-22	C6H14N4O2	174	0	0
HISTIDIN	mol/hr	0	2.84238e-22	0	0	0	C6H8N3O2	155	0	0
LYSINE	mol/hr	0	5.10521e-22	0	5.26319e-12	1.86795e-20	C6H14N2O2	146	0	0
TYROSINE	mol/hr	0	2.47354e-21	0	7.23454e-12	1.01571e-92	C9H11NO3	181	0	0
TRYPTOPH	mol/hr	0	2.5256e-23	0	5.25841e-12	7.38269e-93	C11H12N2O2	204	0	0
PHENYLAL	mol/hr	0	2.79235e-06	0	4.30028e-11	4.05373e-19	C9H11NO2	165	0	0
CYSTEINE	mol/hr	0	5.19688e-06	0	5.19688e-06	4.57649e-16	C3H6NO2S	121	0	0
METHIONI	mol/hr	0	1.06268e-20	0	5.22655e-12	7.33796e-93	C5H11NO2S	149	0	0
THREONIN	mol/hr	0	3.64534e-06	0	5.30331e-12	7.44573e-93	C4H9NO3	119	0	0
SERINE	mol/hr	0	1.33412e-05	0	2.11283e-14	2.96636e-95	C3H7NO3	105	0	0
LEUCINE	mol/hr	0	5.42957e-06	0	5.42957e-06	7.623e-87	C6H13NO2	131	0	0
ISOLEUCI	mol/hr	0	3.56801e-06	0	9.67479e-14	1.35832e-94	C6H13NO2	131	0	0
VALINE	mol/hr	0	5.73984e-06	0	2.08799e-14	2.93149e-95	C5H11NO2	117	0	0
GLUTAMIC	mol/hr	0	5.73947e-06	0	9.95687e-14	5.69477e-22	C5H9NO4	147	0	0
ASPARTIC	mol/hr	0	3.72314e-06	0	2.62913e-11	3.69124e-92	C4H7NO4	133	0	0
GLYCINE	mol/hr	0	1.93901e-05	0	1.93901e-05	1.70712e-15	C2H5NO2	75	0	0
ALANINE	mol/hr	0	3.64557e-06	0	3.64557e-06	5.1183e-87	C3H7NO2	89	0	0
PROLINE	mol/hr	0	8.60975e-06	0	1.18751e-13	1.04575e-23	C5H9NO2	115	0	0
HYDROGEN	mol/hr	0	6.44532e-08	0	7.56428e-08	1.02139e-05	H2	2	0	0
METHANE	mol/hr	0	0.000578623	0	0.000664276	0.00342711	CH4	16	0	0
INDOLE	mol/hr	0	6.78531e-23	0	0	0	C8H7N	117	0	0
FROMAMID	mol/hr	0	3.5663e-22	0	0	0	CH3NO	45	0	0
H2S	mol/hr	0	5.57738e-05	0	2.48975e-10	7.20634e-11	H2S	34	0	0
CH4S	mol/hr	0	1.71518e-21	0	0	0	CH4S	48	0	0
BENZENE	mol/hr	0	2.00614e-11	0	1.2312e-10	5.53319e-11	C6H6	78	0	0
PHENOL	mol/hr	0	3.33232e-19	0	0	0	C6H6O	94	0	0
H2CO3	mol/hr	0	0	0	7.71731e-13	7.32635e-20	H2CO3	62	0	0
HCO3-	mol/hr	0	0	0	0.0171247	0	HCO3-	61	0	0
CO3-2	mol/hr	0	0	0	0.0071455	0	CO3--	60	0	0
HS-	mol/hr	0	0	0	0.00329493	0	HS-	33	0	0
CELLULOS	mol/hr	0.00136117	0.000408352	0	0.000408352	5.73317e-85	C6H10O5	162	0	0
HEMECELL	mol/hr	0.000759331	0.000303732	0	0.000303732	7.64687e-13	C5H8O4	132	0	0
GLUCOSE	mol/hr	0	0	0	0	0	C6H12O6	180	0	0
TRIOLEIN	mol/hr	4.53207e-06	4.53207e-07	0	4.53207e-07	3.55431e-25	C57H104O6	884	0	0
TRIPALM	mol/hr	4.97567e-06	4.97567e-07	0	4.97567e-07	3.62387e-24	C51H98O6	806	0	0
PALM	mol/hr	0	1.48414e-07	0	1.48414e-07	1.40588e-15	C16H34O	242	0	0
SN-1--01	mol/hr	0	0	0	0	0	C37H70O5	594	0	0
SN-1--02	mol/hr	6.77082e-06	6.77082e-07	0	6.77082e-07	4.80676e-21	C37H68O5	592	0	0
XYLOSE	mol/hr	0	7.59331e-05	0	7.59331e-05	8.00431e-15	C5H10O5	150	0	0
FURFURAL	mol/hr	0	0	0	0	0	C5H4O2	96	0	0
LINOLEIC	mol/hr	0	4.97097e-08	0	4.97097e-08	3.22102e-17	C18H32O2	280	0	0
STARCH	mol/hr	0	0	0	0	0	C6H10O5	162	0	0
ETHANOL	mol/hr	0	0.00106191	0	0.00107688	1.206e-05	C2H6O	62	0	0
PROTEIN	mol/hr	8.19116e-05	7.28678e-06	0	7.97696e-06	2.142e-07	C13H25O7N3S	367	0	0
KERATIN	mol/hr	0.000155141	2.30273e-08	0	5.06851e-05	2.68852e-05	C(4.89)H8NO(2.1)S(0.67)	116.424	0	0
ACETATE	mol/hr	0	0	0	3.19502e-05	0	CH3COO-	59	0	0
INERT	mol/hr	0.00110352	0.00110352	0	0.00110352	1.20651e-19	INERT	x	0	0
C3H5O2-	mol/hr	0	0	0	0.000488691	1.35128e-07	C3H5O2-	73	0	0
C5H9O2-	mol/hr	0	0	0	1.25379e-08	6.52088e-13	C5H9O2-	101	0	0
C4H7O2-	mol/hr	0	0	0	0.000342712	4.72231e-08	C4H7O2-	87	0	0
C18H33O2	mol/hr	0	0	0	1.17494e-07	6.00954e-17	C18H33O2	281	0	0
C3H6NO3-	mol/hr	0	0	0	1.10751e-12	0	C3H6NO3-	104	0	0
C5H10NO2	mol/hr	0	0	0	1.28201e-12	1.79991e-93	C5H10NO2-	116	0	0
C5H8NO4-	mol/hr	0	0	0	3.7232e-06	2.12983e-14	C5H8NO4-	146	0	0
ISOLE-01	mol/hr	0	0	0	3.96688e-06	5.56941e-87	C6H12NO2-	130	0	0
PROLI-01	mol/hr	0	0	0	4.26001e-06	3.75146e-16	C5H8NO2-	114	0	0
TYROS-01	mol/hr	0	0	0	1.45216e-12	4.39569e-24	C9H10NO3-	164	0	0
TRYPT-01	mol/hr	0	0	0	7.46874e-13	4.96725e-24	C11H11N2O2-	203	0	0
ARGIN-01	mol/hr	0	0	0	4.96823e-10	2.70354e-12	C6H13N4O2-	173	0	0
LYSIN-01	mol/hr	0	0	0	5.41432e-14	1.92191e-22	C6H13N2O2-	145	0	0
PHENY-01	mol/hr	0	0	0	6.58983e-12	6.21308e-20	C9H10NO2-	164	0	0
METHI-01	mol/hr	0	0	0	1.09076e-12	1.53141e-93	C5H10NO2S-	148	0	0
THREO-01	mol/hr	0	0	0	7.06102e-14	9.91351e-95	C4H8NO3-	118	0	0
ASPAR-01	mol/hr	0	0	0	8.15852e-13	1.14544e-93	C4H6NO4-	132	0	0
C4H6NO4-	mol/hr	0	0	0	8.65134e-12	1.21463e-92	C4H6NO4-	132	0	0
C6H13N2O	mol/hr	0	0	0	1.7265e-10	6.12852e-19	C6H13N2O2-	145	0	0
TYROS-02	mol/hr	0	0	0	1.60665e-07	4.86332e-19	C9H10NO3-	164	0	0
TYROS-03	mol/hr	0	0	0	1.61304e-13	4.88268e-25	C9H10NO3-	164	0	0
TRYPT-02	mol/hr	0	0	0	5.14031e-11	3.41867e-22	C11H11N2O2-	173	0	0
ARGIN-02	mol/hr	0	0	0	5.16033e-07	2.80807e-09	C6H13N4O2-	173	0	0
ARGIN-03	mol/hr	0	0	0	1.16022e-13	6.31351e-16	C6H13N4O2-	173	0	0
PHENY-02	mol/hr	0	0	0	1.03501e-06	9.75833e-15	C9H10NO2-	164	0	0
METHI-02	mol/hr	0	0	0	3.73719e-11	5.24693e-92	C5H10NO2S-	148	0	0
THREO-02	mol/hr	0	0	0	2.66755e-07	3.74518e-88	C4H8NO3	118	0	0
AMMON(S)	mol/hr	0	0	0	0	0	NH2COONH4	78	0	0
NH4HS(S)	mol/hr	0	0	0	1.57387e-08	2.20968e-89	NH4HS	51	0	0
SALT1	mol/hr	0	0	0	0.000197552	2.77358e-85	NH4HCO3	79	0	0
S--	mol/hr	0	0	0	0	0	S-2	32	0	0
NH2COO	mol/hr	0	0	0	2.77389e-15	0	NH2COO-	230	0	0
H3PO4	mol/hr	0	0	0	2.07128e-14	4.05294e-30	H3PO4	98	0	0
H2PO4-	mol/hr	0	0	0	3.37566e-06	0	H2PO4-	97	0	0
HPO4--	mol/hr	0	0	0	8.97405e-10	0	HPO4-2	96	0	0
PO4---	mol/hr	0	0	0	4.03311e-06	0	PO4-3	95	0	0
DIAMM-01	mol/hr	0	0	0	0	0	(NH4)2HPO4	132	0	0
SALT3	mol/hr	0	0	0	0	0	NH6PO4	115	0	0
K+	mol/hr	0	0	0	3.75789e-10	0	K+	39	0	0
KH2PO4	mol/hr	0	1.58534e-06	1.58534e-06	0.0104421	1.46605e-83	KH2PO4	136	0	0
K2HPO4	mol/hr	0	0	0	0.00031258	4.38855e-85	K2HPO4	270	0	0
K2CO3	mol/hr	0	0	0	0	0	K2CO3	138	0	0
KHCO3	mol/hr	0	0	0	0	0	KHCO3	100	0	0
K3PO4	mol/hr	0	0	0	0	0	K3PO4	249	0	0
MG(OH)2	mol/hr	0	7.92671e-07	7.92671e-07	7.29526e-05	1.02424e-85	MG(OH)2	58	0.413793	3.01873e-05
MG++	mol/hr	0	0	0	0.00889245	0	MG+2	24	1	0.00889245
STRUVITE	mol/hr	0	0	0	0	0	NH4MgPO4.6H2O	245	0.0979592	0
FE+++	mol/hr	0	0	0	0	0	FE+3	56	0	0
FE(OH)2	mol/hr	0	7.92671e-07	7.92671e-07	9.55588e-05	1.34162e-85	FE(OH)2	90	0	0
FE++	mol/hr	0	0	0	0.00947431	0	FE+2	56	0	0
FE(OH)3	mol/hr	0	7.92671e-07	7.92671e-07	7.90778e-07	1.11024e-87	FE(OH)3	107	0	0
FES	mol/hr	0	0	0	0	0	FES	88	0	0
FECO3	mol/hr	0	0	0	4.72066e-20	1.87714e-96	FECO3	116	0	0
CA(OH)2	mol/hr	0	7.92671e-07	7.92671e-07	5.9927e-05	8.41362e-86	CA(OH)2	74	0	0
CA++	mol/hr	0	0	0	0.00825062	0	CA+2	40	0	0
CACO3	mol/hr	0	0	0	0	0	CACO3	100	0	0
HCL	mol/hr				2.84722e-09	2.40244e-09
CL-	mol/hr	0.992241	0.988393	0	0.0294301	0
Mole Fractions		0	1.20469e-05	0
WATER		0	1.91008e-07	0	0.807426	0.124493
GLYCEROL		0.00105555	4.15211e-07	0	9.59237e-06	4.14331e-11
OLEIC-AC		0	6.04073e-05	0	1.23309e-13	6.67944e-21
DEXTROSE		0	0.000924887	0	3.30614e-07	6.72548e-18
ACETI-AC		0	0.000649644	0	2.9697e-14	5.7065e-15
PROPI-01		0	1.59259e-09	0	6.00677e-13	7.32833e-14
ISOBU-01		0	0	0	2.87396e-10	2.85032e-12
ISOVA-01		0	0	0	1.19525e-14	6.53208e-16
H+		0.000111661	0.000202763	0	1.21207e-14	0
OH-		0	0	0	0.00175727	0
NH3		0	0.00244602	0	0.0394641	0.17743
NH4+		0	0.000320406	0	8.4469e-15	0
CO2		0	6.6187e-06	0	0.000986601	0.141683
C5H7NO2		0	5.39017e-22	0	0.000255125	4.6798e-07
ARGININE		0	9.68131e-22	0	8.17236e-14	3.08079e-20
HISTIDIN		0	4.69072e-21	0	0	0
LYSINE		0	4.78945e-23	0	7.94732e-12	2.98939e-18
TYROSINE		0	5.2953e-06	0	1.0924e-11	1.62551e-90
TRYPTOPH		0	9.85514e-06	0	7.9401e-12	1.1815e-90
PHENYLAL		0	2.01522e-20	0	6.49334e-11	6.48744e-17
CYSTEINE		0	6.91287e-06	0	7.84719e-06	7.32404e-14
METHIONI		0	2.52998e-05	0	7.89199e-12	1.17434e-90
THREONIN		0	1.02964e-05	0	8.00791e-12	1.19159e-90
SERINE		0	6.76622e-06	0	3.19033e-14	4.74725e-93
LEUCINE		0	1.08848e-05	0	8.19856e-06	1.21996e-84
ISOLEUCI		0	1.08841e-05	0	1.46087e-13	2.1738e-92
VALINE		0	7.0604e-06	0	3.15283e-14	4.69145e-93
GLUTAMIC		0	3.67706e-05	0	1.50347e-13	9.11369e-20
ASPARTIC		0	6.91331e-06	0	3.96994e-11	5.90732e-90
GLYCINE		0	1.63272e-05	0	2.92787e-05	2.732e-13
ALANINE		0	1.22226e-07	0	5.50475e-06	8.19113e-85
PROLINE		0	0.00109728	0	1.79312e-13	1.67358e-21
HYDROGEN		0	1.28674e-22	0	1.14219e-07	0.00163459
METHANE		0	6.76299e-22	0	0.00100304	0.548461
INDOLE		0	0.000105767	0	0	0
FROMAMID		0	3.2526e-21	0	0	0
H2S		0	3.80436e-11	0	3.75948e-10	1.15328e-08
CH4S		0	6.31928e-19	0	0	0
BENZENE		0	0	0	1.85909e-10	8.85511e-09
PHENOL		0	0	0	0	0
H2CO3		0	0	0	1.1653e-12	1.17248e-17
HCO3-		0	0	0	0.025858	0
CO3-2		0.00258022	0.000774381	0	0.0107896	0
HS-		0.00143938	0.000575985	0	0.00497529	0
CELLULOS		0	0	0	0.000616603	9.17514e-83
HEMECELL		8.59094e-06	8.59444e-07	0	0.00045863	1.22378e-10
GLUCOSE		9.4318e-06	9.43565e-07	0	0	0
TRIOLEIN		0	2.81445e-07	0	6.84335e-07	5.68818e-23
TRIPALM		0	0	0	7.51317e-07	5.79951e-22
PALM		1.28347e-05	1.28399e-06	0	2.24102e-07	2.24992e-13
SN-1--01		0	0.000143996	0	0	0
SN-1--02		0	0	0	1.02238e-06	7.69255e-19
XYLOSE		0	9.42674e-08	0	0.000114658	1.28098e-12
FURFURAL		0	0	0	0	0
LINOLEIC		0	0.00201375	0	7.50608e-08	5.15479e-15
STARCH		0.00015527	1.38183e-05	0	0	0
ETHANOL		0.000294082	4.36679e-08	0	0.00162607	0.00193004
PROTEIN		0	0	0	1.20451e-05	3.42798e-05
KERATIN		0.00209181	0.00209267	0	7.65336e-05	0.0043026
ACETATE		0	0	0	4.82443e-05	0
INERT		0	0	0	0.00166629	1.93086e-17
C3H5O2-		0	0	0	0.000737914	2.16254e-05
C5H9O2-		0	0	0	1.8932e-08	1.04358e-10
C4H7O2-		0	0	0	0.000517489	7.55741e-06
C18H33O2		0	0	0	1.77414e-07	9.61744e-15
C3H6NO3-		0	0	0	1.67232e-12	0
C5H10NO2		0	0	0	1.93581e-12	2.88051e-91
C5H8NO4-		0	0	0	5.62197e-06	3.40849e-12
ISOLE-01		0	0	0	5.98992e-06	8.91307e-85
PROLI-01		0	0	0	6.43254e-06	6.0037e-14
TYROS-01		0	0	0	2.19274e-12	7.03469e-22
TRYPT-01		0	0	0	1.12777e-12	7.94939e-22
ARGIN-01		0	0	0	7.50193e-10	4.32664e-10
LYSIN-01		0	0	0	8.17552e-14	3.07575e-20
PHENY-01		0	0	0	9.95052e-12	9.94318e-18
METHI-01		0	0	0	1.64703e-12	2.45081e-91
THREO-01		0	0	0	1.0662e-13	1.58652e-92
ASPAR-01		0	0	0	1.23192e-12	1.83312e-91
C4H6NO4-		0	0	0	1.30634e-11	1.94385e-90
C6H13N2O		0	0	0	2.60698e-10	9.80785e-17
TYROS-02		0	0	0	2.42601e-07	7.78307e-17
TYROS-03		0	0	0	2.43567e-13	7.81405e-23
TRYPT-02		0	0	0	7.76177e-11	5.47111e-20
ARGIN-02		0	0	0	7.79201e-07	4.49393e-07
ARGIN-03		0	0	0	1.75191e-13	1.01039e-13
PHENY-02		0	0	0	1.56284e-06	1.56169e-12
METHI-02		0	0	0	5.64309e-11	8.39699e-90
THREO-02		0	0	0	4.02795e-07	5.99364e-86
AMMON(S)		0	0	0	0	0
NH4HS(S)		0	0	0	2.37652e-08	3.53629e-87
SALT1		0	0	0	0.0002983	4.43874e-83
S--		0	0	0	0	0
NH2COO		0	0	0	4.18852e-15	0
H3PO4		0	0	0	3.12759e-14	6.48618e-28
H2PO4-		0	0	0	5.09719e-06	0
HPO4--		0	0	0	1.35507e-09	0
PO4---		0	0	0	6.08992e-06	0
DIAMM-01		0	0	0	0	0
SALT3		0	3.00638e-06	0.333333	0	0
K+		0	0	0	5.67434e-10	0
KH2PO4		0	0	0	0.0157674	2.3462e-81
K2HPO4		0	0	0	0.00047199	7.02327e-83
K2CO3		0	0	0	0	0
KHCO3		0	1.50319e-06	0.166667	0	0
K3PO4		0	0	0	0	0
MG(OH)2		0	0	0	0.000110157	1.63915e-83
MG++		0	0	0	0.0134274	0
STRUVITE		0	1.50319e-06	0.166667	0	0
FE+++		0	0	0	0	0
FE(OH)2		0	1.50319e-06	0.166667	0.000144292	2.14709e-83
FE++		0	0	0	0.014306	0
FE(OH)3		0	0	0	1.19406e-06	1.77678e-85
FES		0	1.50319e-06	0.166667	0	0
FECO3		0	0	0	7.12811e-20	3.00411e-94
CA(OH)2		0	0	0	9.04887e-05	1.34648e-83
CA++		0.240551	0.23612	1.14395e-05	0.0124583	0
CACO3		0.226322	0.225352	0	0	0
HCL		0	1.40411e-05	0	4.29926e-09	3.84478e-07
CL-		0	6.82808e-07	0	0.044439	0
Mass Flows	kg/day	0.00240768	9.46701e-07	0	0.377487	0.00313531
WATER	kg/day	0	4.59104e-05	0	0.231198	0.000336341
GLYCEROL	kg/day	0	0.000867116	0	1.40411e-05	5.72236e-13
OLEIC-AC	kg/day	0	0.000724392	0	5.53592e-13	2.82937e-22
DEXTROSE	kg/day	0	2.05855e-09	0	9.46701e-07	1.81706e-19
ACETI-AC	kg/day	0	0	0	2.83455e-14	5.13919e-17
PROPI-01	kg/day	0	0	0	7.07258e-13	8.14134e-16
ISOBU-01	kg/day	2.40768e-05	4.37027e-05	0	4.02464e-10	3.76612e-14
ISOVA-01	kg/day	0	0	0	1.94029e-14	1.00049e-17
H+	kg/day	0	0.00136239	0	1.9265e-16	0
OH-	kg/day	0	0.000458687	0	0.000475022	0
NH3	kg/day	0	1.45921e-05	0	0.0106824	0.000453158
NH4+	kg/day	0	1.05156e-21	0	2.4218e-15	0
CO2	kg/day	0	1.79119e-21	0	0.00069013	0.000935106
C5H7NO2	kg/day	0	1.07564e-20	0	0.000458688	7.93861e-09
ARGININE	kg/day	0	1.23792e-22	0	2.26278e-13	8.04842e-22
HISTIDIN	kg/day	0	1.10706e-05	0	0	0
LYSINE	kg/day	0	1.4986e-05	0	1.84661e-11	6.55378e-20
TYROSINE	kg/day	0	3.8056e-20	0	3.146e-11	4.41692e-92
TRYPTOPH	kg/day	0	1.04216e-05	0	2.5774e-11	3.61862e-92
PHENYLAL	kg/day	0	3.36499e-05	0	1.70489e-10	1.60715e-18
CYSTEINE	kg/day	0	1.70934e-05	0	1.4986e-05	1.3197e-15
METHIONI	kg/day	0	1.12328e-05	0	1.8717e-11	2.62782e-92
THREONIN	kg/day	0	1.61378e-05	0	1.51616e-11	2.12865e-92
SERINE	kg/day	0	2.02669e-05	0	5.32906e-14	7.48189e-95
LEUCINE	kg/day	0	1.18935e-05	0	1.70934e-05	2.39987e-86
ISOLEUCI	kg/day	0	3.49335e-05	0	3.04581e-13	4.27625e-94
VALINE	kg/day	0	7.79517e-06	0	5.87049e-14	8.24203e-95
GLUTAMIC	kg/day	0	2.37902e-05	0	3.51591e-13	2.0109e-21
ASPARTIC	kg/day	0	3.11832e-09	0	8.39874e-11	1.17917e-91
GLYCINE	kg/day	0	0.000222785	0	3.49335e-05	3.07556e-15
ALANINE	kg/day	0	1.90776e-22	0	7.79517e-06	1.09443e-86
PROLINE	kg/day	0	3.85511e-22	0	3.2813e-13	2.88958e-23
HYDROGEN	kg/day	0	4.5621e-05	0	3.65969e-09	4.9416e-07
METHANE	kg/day	0	1.98036e-21	0	0.000255764	0.00131953
INDOLE	kg/day	0	3.76097e-11	0	0	0
FROMAMID	kg/day	0	7.52676e-19	0	0	0
H2S	kg/day	0	0	0	2.03653e-10	5.89454e-11
CH4S	kg/day	0	0	0	0	0
BENZENE	kg/day	0	0	0	2.30816e-10	1.03732e-10
PHENOL	kg/day	0	0	0	0	0
H2CO3	kg/day	0.00529689	0.00158907	0	1.1488e-12	1.0906e-19
HCO3-	kg/day	0.00240768	0.000963071	0	0.0250776	0
CO3-2	kg/day	0	0	0	0.0102911	0
HS-	kg/day	9.63071e-05	9.63071e-06	0	0.00261543	0
CELLULOS	kg/day	9.63071e-05	9.63071e-06	0	0.00158907	2.23101e-84
HEMECELL	kg/day	0	9.12369e-07	0	0.000963071	2.42466e-12
GLUCOSE	kg/day	0	0	0	0	0
TRIOLEIN	kg/day	9.63071e-05	9.63071e-06	0	9.63071e-06	7.55295e-24
TRIPALM	kg/day	0	0.000273599	0	9.63071e-06	7.01423e-23
PALM	kg/day	0	0	0	9.12369e-07	8.64263e-15
SN-1--01	kg/day	0	3.34587e-07	0	0	0
SN-1--02	kg/day	0	0	0	9.63071e-06	6.83706e-20
XYLOSE	kg/day	0	0.0011741	0	0.000273599	2.88408e-14
FURFURAL	kg/day	0.000722303	6.42554e-05	0	0	0
LINOLEIC	kg/day	0.000433382	6.43261e-08	0	3.34587e-07	2.16801e-16
STARCH	kg/day	0	0	0	0	0
ETHANOL	kg/day	0.00264844	0.00264844	0	0.00119066	1.33342e-05
PROTEIN	kg/day	0	0	0	7.03415e-05	1.88884e-06
KERATIN	kg/day	0	0	0	0.000141588	7.51032e-05
ACETATE	kg/day	0	0	0	4.52758e-05	0
INERT	kg/day	0	0	0	0.00264844	2.89563e-19
C3H5O2-	kg/day	0	0	0	0.000857025	2.36977e-07
C5H9O2-	kg/day	0	0	0	3.04296e-08	1.58262e-12
C4H7O2-	kg/day	0	0	0	0.000716392	9.87133e-08
C18H33O2	kg/day	0	0	0	7.96498e-07	4.07389e-16
C3H6NO3-	kg/day	0	0	0	2.76664e-12	0
C5H10NO2	kg/day	0	0	0	3.57342e-12	5.017e-93
C5H8NO4-	kg/day	0	0	0	1.30571e-05	7.46919e-14
ISOLE-01	kg/day	0	0	0	1.23925e-05	1.73989e-86
PROLI-01	kg/day	0	0	0	1.16681e-05	1.02752e-15
TYROS-01	kg/day	0	0	0	6.27973e-12	1.90087e-23
TRYPT-01	kg/day	0	0	0	3.64273e-12	2.42267e-23
ARGIN-01	kg/day	0	0	0	2.06513e-09	1.12377e-11
LYSIN-01	kg/day	0	0	0	1.88654e-13	6.69662e-22
PHENY-01	kg/day	0	0	0	2.59667e-11	2.44821e-19
METHI-01	kg/day	0	0	0	3.87978e-12	5.44713e-93
THREO-01	kg/day	0	0	0	2.00159e-13	2.81018e-94
ASPAR-01	kg/day	0	0	0	2.5865e-12	3.63139e-93
C4H6NO4-	kg/day	0	0	0	2.76367e-11	3.88013e-92
C6H13N2O	kg/day	0	0	0	6.0575e-10	2.15022e-18
TYROS-02	kg/day	0	0	0	6.98665e-07	2.11486e-18
TYROS-03	kg/day	0	0	0	7.01447e-13	2.12328e-24
TRYPT-02	kg/day	0	0	0	2.51951e-10	1.67566e-21
ARGIN-02	kg/day	0	0	0	2.15747e-06	1.17402e-08
ARGIN-03	kg/day	0	0	0	4.85073e-13	2.6396e-15
PHENY-02	kg/day	0	0	0	4.10339e-06	3.86879e-14
METHI-02	kg/day	0	0	0	1.33834e-10	1.879e-91
THREO-02	kg/day	0	0	0	7.62623e-07	1.07071e-87
AMMON(S)	kg/day	0	0	0	0	0
NH4HS(S)	kg/day	0	0	0	1.93067e-08	2.71062e-89
SALT1	kg/day	0	0	0	0.000374822	5.26242e-85
S--	kg/day	0	0	0	0	0
NH2COO	kg/day	0	0	0	3.9966e-15	0
H3PO4	kg/day	0	0	0	4.8714e-14	9.53205e-30
H2PO4-	kg/day	0	0	0	7.85755e-06	0
HPO4--	kg/day	0	0	0	2.0672e-09	0
PO4---	kg/day	0	5.17781e-06	5.17781e-06	9.19288e-06	0
DIAMM-01	kg/day	0	0	0	0	0
SALT3	kg/day	0	0	0	0	0
K+	kg/day	0	0	0	3.5262e-10	0
KH2PO4	kg/day	0	0	0	0.0341044	4.78818e-83
K2HPO4	kg/day	0	1.10948e-06	1.10948e-06	0.00130665	1.83451e-84
K2CO3	kg/day	0	0	0	0	0
KHCO3	kg/day	0	0	0	0	0
K3PO4	kg/day	0	0	0	0	0
MG(OH)2	kg/day	0	1.70954e-06	1.70954e-06	0.00010211	1.4336e-85
MG++	kg/day	0	0	0	0.00518691	0
STRUVITE	kg/day	0	2.03309e-06	2.03309e-06	0	0
FE+++	kg/day	0	0	0	0	0
FE(OH)2	kg/day	0	0	0	0.00020609	2.89346e-85
FE++	kg/day	0	1.40955e-06	1.40955e-06	0.0126984	0
FE(OH)3	kg/day	0	0	0	2.02823e-06	2.84759e-87
FES	kg/day	0	0	0	0	0
FECO3	kg/day				1.3126e-19	5.21948e-96
CA(OH)2	kg/day	0.940847	0.954395	0	0.000106564	1.49613e-85
CA++	kg/day	0	5.94657e-05	0	0.00793582	0
CACO3	kg/day	0	2.89178e-06	0	0	0
HCL	kg/day	0.010009	4.0094e-06	0	2.49148e-09	2.10227e-09
CL-	kg/day	0	0.000194437	0	0.0250415	0
Mass Fractions		0	0.00367235	0
WATER		0	0.00306789	0	0.0233307	0.168177
GLYCEROL		0	8.71823e-09	0
OLEIC-AC		0	0	0		-1.35213e+08
DEXTROSE		0	0	0		-6.46743e+06
ACETI-AC		0.00010009	0.000185087	0		-56359.8
PROPI-01		0	0	0		-2695.76
ISOBU-01		0	0.00576989	0		0.0371548
ISOVA-01		0	0.0019426	0		0.776789
H+		0	6.17996e-05	0		-0.234692
OH-		0	4.45347e-21	0		20.9068
NH3		0	7.58591e-21	0		6.24859e-06
NH4+		0	4.55548e-20	0
CO2		0	5.24276e-22	0		0.00313531
C5H7NO2		0	4.68853e-05	0
ARGININE		0	6.34676e-05	0
HISTIDIN		0	1.61172e-19	0	-4.59416e+07
LYSINE		0	4.41369e-05	0	-1.93439e+06
TYROSINE		0	0.000142511	0	1.06482e+38
TRYPTOPH		0	7.23925e-05	0	4.48346e+36
PHENYLAL		0	4.75722e-05	0	28.3857
CYSTEINE		0	6.83458e-05	0	674.159
METHIONI		0	8.58328e-05	0	-8.45146
THREONIN		0	5.03707e-05	0	23.7499
SERINE		0	0.000147948	0	0.00066226
LEUCINE		0	3.30136e-05	0
ISOLEUCI		0	0.000100755	0	0.377487
VALINE		0	1.32065e-08	0	3.31059e-14	2.84318e-93
GLUTAMIC		0	0.000943523	0	0.0011343	3.96845e-10
ASPARTIC		0	8.07962e-22	0	1.81777e-12	1.56112e-91
GLYCINE		0	1.63269e-21	0	0.00011706	6.3042e-13
ALANINE		0	0.000193211	0	2.61212e-05	2.24332e-84
PROLINE		0	8.3871e-21	0	0.00109433	5.89489e-12
HYDROGEN		0	1.59282e-10	0	5.13444e-09	4.24086e-05
METHANE		0	3.18768e-18	0	0.000394655	0.124547
INDOLE		0	0	0	0	0
FROMAMID		0	0	0	0	0
H2S		0	0	0	6.53389e-10	1.12682e-08
CH4S		0	0	0	0	0
BENZENE		0.0220198	0.0067299	0	2.68663e-10	2.17367e-08
PHENOL		0.010009	0.00407873	0	0	0
H2CO3		0	0	0	4.55592e-10	2.64568e-15
HCO3-		0.00040036	4.07873e-05	0	1.02729e-08	0
CO3-2		0.00040036	4.07873e-05	0	4.86172e-18	0
HS-		0	3.864e-06	0	0.00186256	0
CELLULOS		0	0	0	0.00532487	4.57306e-82
HEMECELL		0.00040036	4.07873e-05	0	0.00322719	4.96999e-10
GLUCOSE		0	0.00115873	0	0	0
TRIOLEIN		0	0	0	3.22719e-05	1.54818e-21
TRIPALM		0	1.41702e-06	0	3.22719e-05	1.43775e-20
PALM		0	0	0	3.0573e-06	1.77154e-12
SN-1--01		0	0.00497248	0	0	0
SN-1--02		0.0030027	0.00027213	0	3.22719e-05	1.40144e-17
XYLOSE		0.00180162	2.72429e-07	0	0.000916813	5.91169e-12
FURFURAL		0	0	0	0	0
LINOLEIC		0.0110099	0.0112165	0	1.12118e-06	4.44391e-14
STARCH		0	0	0	0	0
ETHANOL		0	0	0	0.00388729	0.00375417
PROTEIN		0	0	0	0.000224068	0.000458276
KERATIN		0	0	0	6.72902e-05	0.0168007
ACETATE		0	0	0	0.000135385	0
INERT		0	0	0	0.00887478	3.45319e-16
C3H5O2-		0	0	0	0.00235915	3.99031e-05
C5H9O2-		0	0	0	2.5532e-05	8.12276e-08
C4H7O2-		0	0	0	0.00127168	1.07187e-05
C18H33O2		0	0	0	0.000232706	7.28066e-12
C3H6NO3-		0	0	0	6.04559e-06	0
C5H10NO2		0	0	0	0	0
C5H8NO4-		0	0	0	1.92427e-08	6.73336e-15
ISOLE-01		0	0	0	2.09143e-08	1.79615e-87
PROLI-01		0	0	0	1.86215e-08	1.0031e-16
TYROS-01		0	0	0	2.21037e-12	4.09275e-22
TRYPT-01		0	0	0	1.08586e-19	8.17251e-24
ARGIN-01		0	0	0	2.05634e-14	6.84486e-15
LYSIN-01		0	0	0	1.65318e-16	3.11616e-21
PHENY-01		0	0	0	8.011e-12	4.62017e-18
METHI-01		0	0	0	6.48191e-20	1.25819e-93
THREO-01		0	0	0	2.63963e-20	1.00271e-93
ASPAR-01		0	0	0	1.83255e-17	1.12142e-93
C4H6NO4-		0	0	0	4.01257e-12	3.44604e-91
C6H13N2O		0	0	0	5.98909e-08	1.30043e-14
TYROS-02		0	0	0	1.77467e-05	3.28601e-15
TYROS-03		0	0	0	2.44311e-13	4.5237e-23
TRYPT-02		0	0	0	2.01882e-14	8.21304e-24
ARGIN-02		0	0	0	2.84522e-06	9.47077e-07
ARGIN-03		0	0	0	2.17011e-16	1.34435e-16
PHENY-02		0	0	0	0.000157817	9.10176e-11
METHI-02		0	0	0	1.47499e-14	1.26674e-93
THREO-02		0	0	0	1.17752e-14	1.01127e-93
AMMON(S)		0	0	0	0	0
NH4HS(S)		0	0	0	0.000623556	5.35518e-83
SALT1		0	0	0	0	0
S--		0	0	0	0	0
NH2COO		0	0	0	0	0
H3PO4		0	0	0	0.0050514	6.0462e-17
H2PO4-		0	2.19287e-05	0.452627	0.025316	0
HPO4--		0	0	0	5.62632e-09	0
PO4---		0	0	0	1.45915e-20	0
DIAMM-01		0	0	0	0	0
SALT3		0	0	0	0	0
K+		0	4.69879e-06	0.096987	0.0114253	0
KH2PO4		0	0	0	1.82906e-17	1.15529e-93
K2HPO4		0	0	0	0	0
K2CO3		0	0	0	0	0
KHCO3		0	7.24012e-06	0.149442	0	0
K3PO4		0	0	0	0	0
MG(OH)2		0	8.61039e-06	0.177726	0	0
MG++		0	0	0	0.00583517	0
STRUVITE		0	0	0	0	0
FE+++		0	5.96961e-06	0.123218	0	0
FE(OH)2		0	0	0	0	0
FE++		0	0	0	0.0180886	0
FE(OH)3		0.013875	0.0102231	8.33333e-07	6.79649e-06	5.83691e-85
FES					0	0
FECO3		-2.31039e+08			0	0
CA(OH)2		-2.03224e+06			0	0
CA++		-764281			0.011387	0
CACO3		-6722.69			0	0
HCL		0.0411507			7.0539e-10	3.64082e-08
CL-		4.6783			0.091845	0
Volume Flow	l/hr	-0.0101447			0.01763	0.392293
Vapor Phase		113.687
Molar Enthalpy	J/kmol	1.58072e-07				-2.86689e+08
Mass Enthalpy	J/kg					-8.56976e+06
Molar Entropy	J/kmol-K	0.000431297				-17224.1
Mass Entropy	J/kg-K					-514.868
Molar Density	kmol/cum					0.0371548
Mass Density	kg/cum	-2.88077e+08	-2.83718e+08	-6.04276e+08		1.24296
Enthalpy Flow	Watt	-1.51851e+07	-1.5207e+07	-6.02956e+06		-1.16074
Average MW		-167180	-156671	1.03038e+06		33.4535
Mole Flows	kmol/hr	-8812.41	-8397.41	10281.3		1.45756e-05
Mole Fractions		52.5612	51.5819	5.70723
Mass Flows	kg/day	997.138	962.364	571.973		0.0117025
Mass Fractions		-42.2019	-41.5588	-0.000798321
Liquid Phase		18.971	18.657	100.219
Molar Enthalpy	J/kmol	0.000527383	0.000527326	4.75603e-09	-2.26448e+08
Mass Enthalpy	J/kg				-1.09269e+07
Molar Entropy	J/kmol-K	0.24012	0.23612	1.14395e-05	7.78608e+37
Mass Entropy	J/kg-K				3.75704e+36
Molar Density	kmol/cum				34.0327
Mass Density	kg/cum				705.293
Enthalpy Flow	Watt				-37.7411
Average MW					20.724
Mole Flows	kmol/hr				0.000599997
Mole Fractions
Mass Flows	kg/day				0.298424
Mass Fractions

## Sheet: Soluble Ca
	Units	INPUT	LIQUID	NUTRIENT	S1	S2	Formula	Molecular Mass	Ca molar mass fraction	Ca Mol Flow	soluble										Molar Mass
Description
From			B1		B4	B4
To		B2	B4	B2
Stream Class		CONVEN	CONVEN	CONVEN	CONVEN	CONVEN
Maximum Relative Error
Cost Flow	$/sec
MIXED Substream
Phase			Liquid Phase	Liquid Phase	Liquid Phase	Vapor Phase
Temperature	K	296.15	328.15	296.15	328	328
Pressure	N/sqm	101325	101325	101325	101325	101325
Molar Vapor Fraction		0.000299639	0	0	0	1
Molar Liquid Fraction		0.9997	1	1	1	0
Molar Solid Fraction		0	0	0	0	0
Mass Vapor Fraction		0.00179295	0	0	0	1
Mass Liquid Fraction		0.998207	1	1	1	1.44329e-15
Mass Solid Fraction		0	0	0	0	0
Molar Enthalpy	J/kmol	-2.8806e+08	-2.83718e+08	-6.04276e+08	-4.15427e+10	-2.10227e+08
Mass Enthalpy	J/kg	-1.51615e+07	-1.5207e+07	-6.02956e+06	-2.1962e+09	-7.74176e+06
Molar Entropy	J/kmol-K	-167359	-156671	1.03038e+06		-39940.2
Mass Entropy	J/kg-K	-8808.66	-8397.41	10281.3		-1470.82
Molar Density	kmol/cum	38.021	51.5819	5.70723	50.2494	0.0371548
Mass Density	kg/cum	722.375	962.364	571.973	950.501	1.00894
Enthalpy Flow	Watt	-42.2121	-41.5588	-0.000798321	-6118.1	-0.424266
Average MW		18.9994	18.657	100.219	18.9157	27.155
Mole Flows	mol/hr	0.527541	0.527326	4.75603e-06	0.66226	0.00624859	Alias	g/mol			non soluble										N	14
WATER	mol/hr	0.523448	0.521206	0	0.534726	0.000777908	H2O	18	0	0			Ca								C	12
GLYCEROL	mol/hr	0	6.35264e-06	0	6.35264e-06	2.58898e-13	C3H8O3	92	0	0			Soluble flow (mol/hr)	0.00828301							H	1
OLEIC-AC	mol/hr	0	1.00723e-07	0	8.16623e-14	4.17371e-23	C18H34O2	282	0	0			Non-Soluble flow (mol/hr)	0							O	16
DEXTROSE	mol/hr	0.000556845	2.18952e-07	0	2.18952e-07	4.20247e-20	C6H12O6	180	0	0			Soluble mol frac (%)	1.25072							S	32
ACETI-AC	mol/hr	0	3.18543e-05	0	1.96672e-14	3.56576e-17	C2H4O2	60	0	0			Non-Soluble mol frac (%)	0							Fe	56
PROPI-01	mol/hr	0	0.000487717	0	3.97804e-13	4.57917e-16	C3H6O2	74	0	0			Soluble concentration (mol/l)	0.469825							Ca	40
ISOBU-01	mol/hr	0	0.000342575	0	1.90331e-10	1.78105e-14	C4H8O2	88	0	0			Non soluble concentration (mol/l)	0							P	31
ISOVA-01	mol/hr	0	8.39815e-10	0	7.91568e-15	4.08163e-18	C5H10O2	102	0	0			pH	12.3417	12.8196						K	39
H+	mol/hr	0	0	0	8.02707e-15	0	H+	1	0	0				H+	OH-						Mg	24
OH-	mol/hr	0	0	0	0.00116377	0	OH-	17	0	0			Molar Flow	8.02707e-15	0.00116377
NH3	mol/hr	5.89058e-05	0.000106922	0	0.0261355	0.00110869	H3N	17	0	0			Volume Flow	0.01763	0.01763
NH4+	mol/hr	0	0	0	5.59404e-15	0	NH4+	18	0	0			Concentration	4.55307e-13	0.0660105	3.0055e-14
CO2	mol/hr	0	0.00128985	0	0.000653386	0.00088532	CO2	14	0	0
C5H7NO2	mol/hr	0	0.000168959	0	0.000168959	2.92421e-09	C5H7NO2	113	0	0
ARGININE	mol/hr	0	3.49022e-06	0	5.41222e-14	1.92506e-22	C6H14N4O2	174	0	0
HISTIDIN	mol/hr	0	2.84238e-22	0	0	0	C6H8N3O2	155	0	0
LYSINE	mol/hr	0	5.10521e-22	0	5.26319e-12	1.86795e-20	C6H14N2O2	146	0	0
TYROSINE	mol/hr	0	2.47354e-21	0	7.23454e-12	1.01571e-92	C9H11NO3	181	0	0
TRYPTOPH	mol/hr	0	2.5256e-23	0	5.25841e-12	7.38269e-93	C11H12N2O2	204	0	0
PHENYLAL	mol/hr	0	2.79235e-06	0	4.30028e-11	4.05373e-19	C9H11NO2	165	0	0
CYSTEINE	mol/hr	0	5.19688e-06	0	5.19688e-06	4.57649e-16	C3H6NO2S	121	0	0
METHIONI	mol/hr	0	1.06268e-20	0	5.22655e-12	7.33796e-93	C5H11NO2S	149	0	0
THREONIN	mol/hr	0	3.64534e-06	0	5.30331e-12	7.44573e-93	C4H9NO3	119	0	0
SERINE	mol/hr	0	1.33412e-05	0	2.11283e-14	2.96636e-95	C3H7NO3	105	0	0
LEUCINE	mol/hr	0	5.42957e-06	0	5.42957e-06	7.623e-87	C6H13NO2	131	0	0
ISOLEUCI	mol/hr	0	3.56801e-06	0	9.67479e-14	1.35832e-94	C6H13NO2	131	0	0
VALINE	mol/hr	0	5.73984e-06	0	2.08799e-14	2.93149e-95	C5H11NO2	117	0	0
GLUTAMIC	mol/hr	0	5.73947e-06	0	9.95687e-14	5.69477e-22	C5H9NO4	147	0	0
ASPARTIC	mol/hr	0	3.72314e-06	0	2.62913e-11	3.69124e-92	C4H7NO4	133	0	0
GLYCINE	mol/hr	0	1.93901e-05	0	1.93901e-05	1.70712e-15	C2H5NO2	75	0	0
ALANINE	mol/hr	0	3.64557e-06	0	3.64557e-06	5.1183e-87	C3H7NO2	89	0	0
PROLINE	mol/hr	0	8.60975e-06	0	1.18751e-13	1.04575e-23	C5H9NO2	115	0	0
HYDROGEN	mol/hr	0	6.44532e-08	0	7.56428e-08	1.02139e-05	H2	2	0	0
METHANE	mol/hr	0	0.000578623	0	0.000664276	0.00342711	CH4	16	0	0
INDOLE	mol/hr	0	6.78531e-23	0	0	0	C8H7N	117	0	0
FROMAMID	mol/hr	0	3.5663e-22	0	0	0	CH3NO	45	0	0
H2S	mol/hr	0	5.57738e-05	0	2.48975e-10	7.20634e-11	H2S	34	0	0
CH4S	mol/hr	0	1.71518e-21	0	0	0	CH4S	48	0	0
BENZENE	mol/hr	0	2.00614e-11	0	1.2312e-10	5.53319e-11	C6H6	78	0	0
PHENOL	mol/hr	0	3.33232e-19	0	0	0	C6H6O	94	0	0
H2CO3	mol/hr	0	0	0	7.71731e-13	7.32635e-20	H2CO3	62	0	0
HCO3-	mol/hr	0	0	0	0.0171247	0	HCO3-	61	0	0
CO3-2	mol/hr	0	0	0	0.0071455	0	CO3--	60	0	0
HS-	mol/hr	0	0	0	0.00329493	0	HS-	33	0	0
CELLULOS	mol/hr	0.00136117	0.000408352	0	0.000408352	5.73317e-85	C6H10O5	162	0	0
HEMECELL	mol/hr	0.000759331	0.000303732	0	0.000303732	7.64687e-13	C5H8O4	132	0	0
GLUCOSE	mol/hr	0	0	0	0	0	C6H12O6	180	0	0
TRIOLEIN	mol/hr	4.53207e-06	4.53207e-07	0	4.53207e-07	3.55431e-25	C57H104O6	884	0	0
TRIPALM	mol/hr	4.97567e-06	4.97567e-07	0	4.97567e-07	3.62387e-24	C51H98O6	806	0	0
PALM	mol/hr	0	1.48414e-07	0	1.48414e-07	1.40588e-15	C16H34O	242	0	0
SN-1--01	mol/hr	0	0	0	0	0	C37H70O5	594	0	0
SN-1--02	mol/hr	6.77082e-06	6.77082e-07	0	6.77082e-07	4.80676e-21	C37H68O5	592	0	0
XYLOSE	mol/hr	0	7.59331e-05	0	7.59331e-05	8.00431e-15	C5H10O5	150	0	0
FURFURAL	mol/hr	0	0	0	0	0	C5H4O2	96	0	0
LINOLEIC	mol/hr	0	4.97097e-08	0	4.97097e-08	3.22102e-17	C18H32O2	280	0	0
STARCH	mol/hr	0	0	0	0	0	C6H10O5	162	0	0
ETHANOL	mol/hr	0	0.00106191	0	0.00107688	1.206e-05	C2H6O	62	0	0
PROTEIN	mol/hr	8.19116e-05	7.28678e-06	0	7.97696e-06	2.142e-07	C13H25O7N3S	367	0	0
KERATIN	mol/hr	0.000155141	2.30273e-08	0	5.06851e-05	2.68852e-05	C(4.89)H8NO(2.1)S(0.67)	116.424	0	0
ACETATE	mol/hr	0	0	0	3.19502e-05	0	CH3COO-	59	0	0
INERT	mol/hr	0.00110352	0.00110352	0	0.00110352	1.20651e-19	INERT	x	0	0
C3H5O2-	mol/hr	0	0	0	0.000488691	1.35128e-07	C3H5O2-	73	0	0
C5H9O2-	mol/hr	0	0	0	1.25379e-08	6.52088e-13	C5H9O2-	101	0	0
C4H7O2-	mol/hr	0	0	0	0.000342712	4.72231e-08	C4H7O2-	87	0	0
C18H33O2	mol/hr	0	0	0	1.17494e-07	6.00954e-17	C18H33O2	281	0	0
C3H6NO3-	mol/hr	0	0	0	1.10751e-12	0	C3H6NO3-	104	0	0
C5H10NO2	mol/hr	0	0	0	1.28201e-12	1.79991e-93	C5H10NO2-	116	0	0
C5H8NO4-	mol/hr	0	0	0	3.7232e-06	2.12983e-14	C5H8NO4-	146	0	0
ISOLE-01	mol/hr	0	0	0	3.96688e-06	5.56941e-87	C6H12NO2-	130	0	0
PROLI-01	mol/hr	0	0	0	4.26001e-06	3.75146e-16	C5H8NO2-	114	0	0
TYROS-01	mol/hr	0	0	0	1.45216e-12	4.39569e-24	C9H10NO3-	164	0	0
TRYPT-01	mol/hr	0	0	0	7.46874e-13	4.96725e-24	C11H11N2O2-	203	0	0
ARGIN-01	mol/hr	0	0	0	4.96823e-10	2.70354e-12	C6H13N4O2-	173	0	0
LYSIN-01	mol/hr	0	0	0	5.41432e-14	1.92191e-22	C6H13N2O2-	145	0	0
PHENY-01	mol/hr	0	0	0	6.58983e-12	6.21308e-20	C9H10NO2-	164	0	0
METHI-01	mol/hr	0	0	0	1.09076e-12	1.53141e-93	C5H10NO2S-	148	0	0
THREO-01	mol/hr	0	0	0	7.06102e-14	9.91351e-95	C4H8NO3-	118	0	0
ASPAR-01	mol/hr	0	0	0	8.15852e-13	1.14544e-93	C4H6NO4-	132	0	0
C4H6NO4-	mol/hr	0	0	0	8.65134e-12	1.21463e-92	C4H6NO4-	132	0	0
C6H13N2O	mol/hr	0	0	0	1.7265e-10	6.12852e-19	C6H13N2O2-	145	0	0
TYROS-02	mol/hr	0	0	0	1.60665e-07	4.86332e-19	C9H10NO3-	164	0	0
TYROS-03	mol/hr	0	0	0	1.61304e-13	4.88268e-25	C9H10NO3-	164	0	0
TRYPT-02	mol/hr	0	0	0	5.14031e-11	3.41867e-22	C11H11N2O2-	173	0	0
ARGIN-02	mol/hr	0	0	0	5.16033e-07	2.80807e-09	C6H13N4O2-	173	0	0
ARGIN-03	mol/hr	0	0	0	1.16022e-13	6.31351e-16	C6H13N4O2-	173	0	0
PHENY-02	mol/hr	0	0	0	1.03501e-06	9.75833e-15	C9H10NO2-	164	0	0
METHI-02	mol/hr	0	0	0	3.73719e-11	5.24693e-92	C5H10NO2S-	148	0	0
THREO-02	mol/hr	0	0	0	2.66755e-07	3.74518e-88	C4H8NO3	118	0	0
AMMON(S)	mol/hr	0	0	0	0	0	NH2COONH4	78	0	0
NH4HS(S)	mol/hr	0	0	0	1.57387e-08	2.20968e-89	NH4HS	51	0	0
SALT1	mol/hr	0	0	0	0.000197552	2.77358e-85	NH4HCO3	79	0	0
S--	mol/hr	0	0	0	0	0	S-2	32	0	0
NH2COO	mol/hr	0	0	0	2.77389e-15	0	NH2COO-	230	0	0
H3PO4	mol/hr	0	0	0	2.07128e-14	4.05294e-30	H3PO4	98	0	0
H2PO4-	mol/hr	0	0	0	3.37566e-06	0	H2PO4-	97	0	0
HPO4--	mol/hr	0	0	0	8.97405e-10	0	HPO4-2	96	0	0
PO4---	mol/hr	0	0	0	4.03311e-06	0	PO4-3	95	0	0
DIAMM-01	mol/hr	0	0	0	0	0	(NH4)2HPO4	132	0	0
SALT3	mol/hr	0	0	0	0	0	NH6PO4	115	0	0
K+	mol/hr	0	0	0	3.75789e-10	0	K+	39	0	0
KH2PO4	mol/hr	0	1.58534e-06	1.58534e-06	0.0104421	1.46605e-83	KH2PO4	136	0	0
K2HPO4	mol/hr	0	0	0	0.00031258	4.38855e-85	K2HPO4	270	0	0
K2CO3	mol/hr	0	0	0	0	0	K2CO3	138	0	0
KHCO3	mol/hr	0	0	0	0	0	KHCO3	100	0	0
K3PO4	mol/hr	0	0	0	0	0	K3PO4	249	0	0
MG(OH)2	mol/hr	0	7.92671e-07	7.92671e-07	7.29526e-05	1.02424e-85	MG(OH)2	58	0	0
MG++	mol/hr	0	0	0	0.00889245	0	MG+2	24	0	0
STRUVITE	mol/hr	0	0	0	0	0	NH4MgPO4.6H2O	245	0	0
FE+++	mol/hr	0	0	0	0	0	FE+3	56	0	0
FE(OH)2	mol/hr	0	7.92671e-07	7.92671e-07	9.55588e-05	1.34162e-85	FE(OH)2	90	0	0
FE++	mol/hr	0	0	0	0.00947431	0	FE+2	56	0	0
FE(OH)3	mol/hr	0	7.92671e-07	7.92671e-07	7.90778e-07	1.11024e-87	FE(OH)3	107	0	0
FES	mol/hr	0	0	0	0	0	FES	88	0	0
FECO3	mol/hr	0	0	0	4.72066e-20	1.87714e-96	FECO3	116	0	0
CA(OH)2	mol/hr	0	7.92671e-07	7.92671e-07	5.9927e-05	8.41362e-86	CA(OH)2	74	0.540541	3.2393e-05
CA++	mol/hr	0	0	0	0.00825062	0	CA+2	40	1	0.00825062
CACO3	mol/hr	0	0	0	0	0	CACO3	100	0.4	0
HCL	mol/hr				2.84722e-09	2.40244e-09
CL-	mol/hr	0.992241	0.988393	0	0.0294301	0
Mole Fractions		0	1.20469e-05	0
WATER		0	1.91008e-07	0	0.807426	0.124493
GLYCEROL		0.00105555	4.15211e-07	0	9.59237e-06	4.14331e-11
OLEIC-AC		0	6.04073e-05	0	1.23309e-13	6.67944e-21
DEXTROSE		0	0.000924887	0	3.30614e-07	6.72548e-18
ACETI-AC		0	0.000649644	0	2.9697e-14	5.7065e-15
PROPI-01		0	1.59259e-09	0	6.00677e-13	7.32833e-14
ISOBU-01		0	0	0	2.87396e-10	2.85032e-12
ISOVA-01		0	0	0	1.19525e-14	6.53208e-16
H+		0.000111661	0.000202763	0	1.21207e-14	0
OH-		0	0	0	0.00175727	0
NH3		0	0.00244602	0	0.0394641	0.17743
NH4+		0	0.000320406	0	8.4469e-15	0
CO2		0	6.6187e-06	0	0.000986601	0.141683
C5H7NO2		0	5.39017e-22	0	0.000255125	4.6798e-07
ARGININE		0	9.68131e-22	0	8.17236e-14	3.08079e-20
HISTIDIN		0	4.69072e-21	0	0	0
LYSINE		0	4.78945e-23	0	7.94732e-12	2.98939e-18
TYROSINE		0	5.2953e-06	0	1.0924e-11	1.62551e-90
TRYPTOPH		0	9.85514e-06	0	7.9401e-12	1.1815e-90
PHENYLAL		0	2.01522e-20	0	6.49334e-11	6.48744e-17
CYSTEINE		0	6.91287e-06	0	7.84719e-06	7.32404e-14
METHIONI		0	2.52998e-05	0	7.89199e-12	1.17434e-90
THREONIN		0	1.02964e-05	0	8.00791e-12	1.19159e-90
SERINE		0	6.76622e-06	0	3.19033e-14	4.74725e-93
LEUCINE		0	1.08848e-05	0	8.19856e-06	1.21996e-84
ISOLEUCI		0	1.08841e-05	0	1.46087e-13	2.1738e-92
VALINE		0	7.0604e-06	0	3.15283e-14	4.69145e-93
GLUTAMIC		0	3.67706e-05	0	1.50347e-13	9.11369e-20
ASPARTIC		0	6.91331e-06	0	3.96994e-11	5.90732e-90
GLYCINE		0	1.63272e-05	0	2.92787e-05	2.732e-13
ALANINE		0	1.22226e-07	0	5.50475e-06	8.19113e-85
PROLINE		0	0.00109728	0	1.79312e-13	1.67358e-21
HYDROGEN		0	1.28674e-22	0	1.14219e-07	0.00163459
METHANE		0	6.76299e-22	0	0.00100304	0.548461
INDOLE		0	0.000105767	0	0	0
FROMAMID		0	3.2526e-21	0	0	0
H2S		0	3.80436e-11	0	3.75948e-10	1.15328e-08
CH4S		0	6.31928e-19	0	0	0
BENZENE		0	0	0	1.85909e-10	8.85511e-09
PHENOL		0	0	0	0	0
H2CO3		0	0	0	1.1653e-12	1.17248e-17
HCO3-		0	0	0	0.025858	0
CO3-2		0.00258022	0.000774381	0	0.0107896	0
HS-		0.00143938	0.000575985	0	0.00497529	0
CELLULOS		0	0	0	0.000616603	9.17514e-83
HEMECELL		8.59094e-06	8.59444e-07	0	0.00045863	1.22378e-10
GLUCOSE		9.4318e-06	9.43565e-07	0	0	0
TRIOLEIN		0	2.81445e-07	0	6.84335e-07	5.68818e-23
TRIPALM		0	0	0	7.51317e-07	5.79951e-22
PALM		1.28347e-05	1.28399e-06	0	2.24102e-07	2.24992e-13
SN-1--01		0	0.000143996	0	0	0
SN-1--02		0	0	0	1.02238e-06	7.69255e-19
XYLOSE		0	9.42674e-08	0	0.000114658	1.28098e-12
FURFURAL		0	0	0	0	0
LINOLEIC		0	0.00201375	0	7.50608e-08	5.15479e-15
STARCH		0.00015527	1.38183e-05	0	0	0
ETHANOL		0.000294082	4.36679e-08	0	0.00162607	0.00193004
PROTEIN		0	0	0	1.20451e-05	3.42798e-05
KERATIN		0.00209181	0.00209267	0	7.65336e-05	0.0043026
ACETATE		0	0	0	4.82443e-05	0
INERT		0	0	0	0.00166629	1.93086e-17
C3H5O2-		0	0	0	0.000737914	2.16254e-05
C5H9O2-		0	0	0	1.8932e-08	1.04358e-10
C4H7O2-		0	0	0	0.000517489	7.55741e-06
C18H33O2		0	0	0	1.77414e-07	9.61744e-15
C3H6NO3-		0	0	0	1.67232e-12	0
C5H10NO2		0	0	0	1.93581e-12	2.88051e-91
C5H8NO4-		0	0	0	5.62197e-06	3.40849e-12
ISOLE-01		0	0	0	5.98992e-06	8.91307e-85
PROLI-01		0	0	0	6.43254e-06	6.0037e-14
TYROS-01		0	0	0	2.19274e-12	7.03469e-22
TRYPT-01		0	0	0	1.12777e-12	7.94939e-22
ARGIN-01		0	0	0	7.50193e-10	4.32664e-10
LYSIN-01		0	0	0	8.17552e-14	3.07575e-20
PHENY-01		0	0	0	9.95052e-12	9.94318e-18
METHI-01		0	0	0	1.64703e-12	2.45081e-91
THREO-01		0	0	0	1.0662e-13	1.58652e-92
ASPAR-01		0	0	0	1.23192e-12	1.83312e-91
C4H6NO4-		0	0	0	1.30634e-11	1.94385e-90
C6H13N2O		0	0	0	2.60698e-10	9.80785e-17
TYROS-02		0	0	0	2.42601e-07	7.78307e-17
TYROS-03		0	0	0	2.43567e-13	7.81405e-23
TRYPT-02		0	0	0	7.76177e-11	5.47111e-20
ARGIN-02		0	0	0	7.79201e-07	4.49393e-07
ARGIN-03		0	0	0	1.75191e-13	1.01039e-13
PHENY-02		0	0	0	1.56284e-06	1.56169e-12
METHI-02		0	0	0	5.64309e-11	8.39699e-90
THREO-02		0	0	0	4.02795e-07	5.99364e-86
AMMON(S)		0	0	0	0	0
NH4HS(S)		0	0	0	2.37652e-08	3.53629e-87
SALT1		0	0	0	0.0002983	4.43874e-83
S--		0	0	0	0	0
NH2COO		0	0	0	4.18852e-15	0
H3PO4		0	0	0	3.12759e-14	6.48618e-28
H2PO4-		0	0	0	5.09719e-06	0
HPO4--		0	0	0	1.35507e-09	0
PO4---		0	0	0	6.08992e-06	0
DIAMM-01		0	0	0	0	0
SALT3		0	3.00638e-06	0.333333	0	0
K+		0	0	0	5.67434e-10	0
KH2PO4		0	0	0	0.0157674	2.3462e-81
K2HPO4		0	0	0	0.00047199	7.02327e-83
K2CO3		0	0	0	0	0
KHCO3		0	1.50319e-06	0.166667	0	0
K3PO4		0	0	0	0	0
MG(OH)2		0	0	0	0.000110157	1.63915e-83
MG++		0	0	0	0.0134274	0
STRUVITE		0	1.50319e-06	0.166667	0	0
FE+++		0	0	0	0	0
FE(OH)2		0	1.50319e-06	0.166667	0.000144292	2.14709e-83
FE++		0	0	0	0.014306	0
FE(OH)3		0	0	0	1.19406e-06	1.77678e-85
FES		0	1.50319e-06	0.166667	0	0
FECO3		0	0	0	7.12811e-20	3.00411e-94
CA(OH)2		0	0	0	9.04887e-05	1.34648e-83
CA++		0.240551	0.23612	1.14395e-05	0.0124583	0
CACO3		0.226322	0.225352	0	0	0
HCL		0	1.40411e-05	0	4.29926e-09	3.84478e-07
CL-		0	6.82808e-07	0	0.044439	0
Mass Flows	kg/day	0.00240768	9.46701e-07	0	0.377487	0.00313531
WATER	kg/day	0	4.59104e-05	0	0.231198	0.000336341
GLYCEROL	kg/day	0	0.000867116	0	1.40411e-05	5.72236e-13
OLEIC-AC	kg/day	0	0.000724392	0	5.53592e-13	2.82937e-22
DEXTROSE	kg/day	0	2.05855e-09	0	9.46701e-07	1.81706e-19
ACETI-AC	kg/day	0	0	0	2.83455e-14	5.13919e-17
PROPI-01	kg/day	0	0	0	7.07258e-13	8.14134e-16
ISOBU-01	kg/day	2.40768e-05	4.37027e-05	0	4.02464e-10	3.76612e-14
ISOVA-01	kg/day	0	0	0	1.94029e-14	1.00049e-17
H+	kg/day	0	0.00136239	0	1.9265e-16	0
OH-	kg/day	0	0.000458687	0	0.000475022	0
NH3	kg/day	0	1.45921e-05	0	0.0106824	0.000453158
NH4+	kg/day	0	1.05156e-21	0	2.4218e-15	0
CO2	kg/day	0	1.79119e-21	0	0.00069013	0.000935106
C5H7NO2	kg/day	0	1.07564e-20	0	0.000458688	7.93861e-09
ARGININE	kg/day	0	1.23792e-22	0	2.26278e-13	8.04842e-22
HISTIDIN	kg/day	0	1.10706e-05	0	0	0
LYSINE	kg/day	0	1.4986e-05	0	1.84661e-11	6.55378e-20
TYROSINE	kg/day	0	3.8056e-20	0	3.146e-11	4.41692e-92
TRYPTOPH	kg/day	0	1.04216e-05	0	2.5774e-11	3.61862e-92
PHENYLAL	kg/day	0	3.36499e-05	0	1.70489e-10	1.60715e-18
CYSTEINE	kg/day	0	1.70934e-05	0	1.4986e-05	1.3197e-15
METHIONI	kg/day	0	1.12328e-05	0	1.8717e-11	2.62782e-92
THREONIN	kg/day	0	1.61378e-05	0	1.51616e-11	2.12865e-92
SERINE	kg/day	0	2.02669e-05	0	5.32906e-14	7.48189e-95
LEUCINE	kg/day	0	1.18935e-05	0	1.70934e-05	2.39987e-86
ISOLEUCI	kg/day	0	3.49335e-05	0	3.04581e-13	4.27625e-94
VALINE	kg/day	0	7.79517e-06	0	5.87049e-14	8.24203e-95
GLUTAMIC	kg/day	0	2.37902e-05	0	3.51591e-13	2.0109e-21
ASPARTIC	kg/day	0	3.11832e-09	0	8.39874e-11	1.17917e-91
GLYCINE	kg/day	0	0.000222785	0	3.49335e-05	3.07556e-15
ALANINE	kg/day	0	1.90776e-22	0	7.79517e-06	1.09443e-86
PROLINE	kg/day	0	3.85511e-22	0	3.2813e-13	2.88958e-23
HYDROGEN	kg/day	0	4.5621e-05	0	3.65969e-09	4.9416e-07
METHANE	kg/day	0	1.98036e-21	0	0.000255764	0.00131953
INDOLE	kg/day	0	3.76097e-11	0	0	0
FROMAMID	kg/day	0	7.52676e-19	0	0	0
H2S	kg/day	0	0	0	2.03653e-10	5.89454e-11
CH4S	kg/day	0	0	0	0	0
BENZENE	kg/day	0	0	0	2.30816e-10	1.03732e-10
PHENOL	kg/day	0	0	0	0	0
H2CO3	kg/day	0.00529689	0.00158907	0	1.1488e-12	1.0906e-19
HCO3-	kg/day	0.00240768	0.000963071	0	0.0250776	0
CO3-2	kg/day	0	0	0	0.0102911	0
HS-	kg/day	9.63071e-05	9.63071e-06	0	0.00261543	0
CELLULOS	kg/day	9.63071e-05	9.63071e-06	0	0.00158907	2.23101e-84
HEMECELL	kg/day	0	9.12369e-07	0	0.000963071	2.42466e-12
GLUCOSE	kg/day	0	0	0	0	0
TRIOLEIN	kg/day	9.63071e-05	9.63071e-06	0	9.63071e-06	7.55295e-24
TRIPALM	kg/day	0	0.000273599	0	9.63071e-06	7.01423e-23
PALM	kg/day	0	0	0	9.12369e-07	8.64263e-15
SN-1--01	kg/day	0	3.34587e-07	0	0	0
SN-1--02	kg/day	0	0	0	9.63071e-06	6.83706e-20
XYLOSE	kg/day	0	0.0011741	0	0.000273599	2.88408e-14
FURFURAL	kg/day	0.000722303	6.42554e-05	0	0	0
LINOLEIC	kg/day	0.000433382	6.43261e-08	0	3.34587e-07	2.16801e-16
STARCH	kg/day	0	0	0	0	0
ETHANOL	kg/day	0.00264844	0.00264844	0	0.00119066	1.33342e-05
PROTEIN	kg/day	0	0	0	7.03415e-05	1.88884e-06
KERATIN	kg/day	0	0	0	0.000141588	7.51032e-05
ACETATE	kg/day	0	0	0	4.52758e-05	0
INERT	kg/day	0	0	0	0.00264844	2.89563e-19
C3H5O2-	kg/day	0	0	0	0.000857025	2.36977e-07
C5H9O2-	kg/day	0	0	0	3.04296e-08	1.58262e-12
C4H7O2-	kg/day	0	0	0	0.000716392	9.87133e-08
C18H33O2	kg/day	0	0	0	7.96498e-07	4.07389e-16
C3H6NO3-	kg/day	0	0	0	2.76664e-12	0
C5H10NO2	kg/day	0	0	0	3.57342e-12	5.017e-93
C5H8NO4-	kg/day	0	0	0	1.30571e-05	7.46919e-14
ISOLE-01	kg/day	0	0	0	1.23925e-05	1.73989e-86
PROLI-01	kg/day	0	0	0	1.16681e-05	1.02752e-15
TYROS-01	kg/day	0	0	0	6.27973e-12	1.90087e-23
TRYPT-01	kg/day	0	0	0	3.64273e-12	2.42267e-23
ARGIN-01	kg/day	0	0	0	2.06513e-09	1.12377e-11
LYSIN-01	kg/day	0	0	0	1.88654e-13	6.69662e-22
PHENY-01	kg/day	0	0	0	2.59667e-11	2.44821e-19
METHI-01	kg/day	0	0	0	3.87978e-12	5.44713e-93
THREO-01	kg/day	0	0	0	2.00159e-13	2.81018e-94
ASPAR-01	kg/day	0	0	0	2.5865e-12	3.63139e-93
C4H6NO4-	kg/day	0	0	0	2.76367e-11	3.88013e-92
C6H13N2O	kg/day	0	0	0	6.0575e-10	2.15022e-18
TYROS-02	kg/day	0	0	0	6.98665e-07	2.11486e-18
TYROS-03	kg/day	0	0	0	7.01447e-13	2.12328e-24
TRYPT-02	kg/day	0	0	0	2.51951e-10	1.67566e-21
ARGIN-02	kg/day	0	0	0	2.15747e-06	1.17402e-08
ARGIN-03	kg/day	0	0	0	4.85073e-13	2.6396e-15
PHENY-02	kg/day	0	0	0	4.10339e-06	3.86879e-14
METHI-02	kg/day	0	0	0	1.33834e-10	1.879e-91
THREO-02	kg/day	0	0	0	7.62623e-07	1.07071e-87
AMMON(S)	kg/day	0	0	0	0	0
NH4HS(S)	kg/day	0	0	0	1.93067e-08	2.71062e-89
SALT1	kg/day	0	0	0	0.000374822	5.26242e-85
S--	kg/day	0	0	0	0	0
NH2COO	kg/day	0	0	0	3.9966e-15	0
H3PO4	kg/day	0	0	0	4.8714e-14	9.53205e-30
H2PO4-	kg/day	0	0	0	7.85755e-06	0
HPO4--	kg/day	0	0	0	2.0672e-09	0
PO4---	kg/day	0	5.17781e-06	5.17781e-06	9.19288e-06	0
DIAMM-01	kg/day	0	0	0	0	0
SALT3	kg/day	0	0	0	0	0
K+	kg/day	0	0	0	3.5262e-10	0
KH2PO4	kg/day	0	0	0	0.0341044	4.78818e-83
K2HPO4	kg/day	0	1.10948e-06	1.10948e-06	0.00130665	1.83451e-84
K2CO3	kg/day	0	0	0	0	0
KHCO3	kg/day	0	0	0	0	0
K3PO4	kg/day	0	0	0	0	0
MG(OH)2	kg/day	0	1.70954e-06	1.70954e-06	0.00010211	1.4336e-85
MG++	kg/day	0	0	0	0.00518691	0
STRUVITE	kg/day	0	2.03309e-06	2.03309e-06	0	0
FE+++	kg/day	0	0	0	0	0
FE(OH)2	kg/day	0	0	0	0.00020609	2.89346e-85
FE++	kg/day	0	1.40955e-06	1.40955e-06	0.0126984	0
FE(OH)3	kg/day	0	0	0	2.02823e-06	2.84759e-87
FES	kg/day	0	0	0	0	0
FECO3	kg/day				1.3126e-19	5.21948e-96
CA(OH)2	kg/day	0.940847	0.954395	0	0.000106564	1.49613e-85
CA++	kg/day	0	5.94657e-05	0	0.00793582	0
CACO3	kg/day	0	2.89178e-06	0	0	0
HCL	kg/day	0.010009	4.0094e-06	0	2.49148e-09	2.10227e-09
CL-	kg/day	0	0.000194437	0	0.0250415	0
Mass Fractions		0	0.00367235	0
WATER		0	0.00306789	0	0.0233307	0.168177
GLYCEROL		0	8.71823e-09	0
OLEIC-AC		0	0	0		-1.35213e+08
DEXTROSE		0	0	0		-6.46743e+06
ACETI-AC		0.00010009	0.000185087	0		-56359.8
PROPI-01		0	0	0		-2695.76
ISOBU-01		0	0.00576989	0		0.0371548
ISOVA-01		0	0.0019426	0		0.776789
H+		0	6.17996e-05	0		-0.234692
OH-		0	4.45347e-21	0		20.9068
NH3		0	7.58591e-21	0		6.24859e-06
NH4+		0	4.55548e-20	0
CO2		0	5.24276e-22	0		0.00313531
C5H7NO2		0	4.68853e-05	0
ARGININE		0	6.34676e-05	0
HISTIDIN		0	1.61172e-19	0	-4.59416e+07
LYSINE		0	4.41369e-05	0	-1.93439e+06
TYROSINE		0	0.000142511	0	1.06482e+38
TRYPTOPH		0	7.23925e-05	0	4.48346e+36
PHENYLAL		0	4.75722e-05	0	28.3857
CYSTEINE		0	6.83458e-05	0	674.159
METHIONI		0	8.58328e-05	0	-8.45146
THREONIN		0	5.03707e-05	0	23.7499
SERINE		0	0.000147948	0	0.00066226
LEUCINE		0	3.30136e-05	0
ISOLEUCI		0	0.000100755	0	0.377487
VALINE		0	1.32065e-08	0	3.31059e-14	2.84318e-93
GLUTAMIC		0	0.000943523	0	0.0011343	3.96845e-10
ASPARTIC		0	8.07962e-22	0	1.81777e-12	1.56112e-91
GLYCINE		0	1.63269e-21	0	0.00011706	6.3042e-13
ALANINE		0	0.000193211	0	2.61212e-05	2.24332e-84
PROLINE		0	8.3871e-21	0	0.00109433	5.89489e-12
HYDROGEN		0	1.59282e-10	0	5.13444e-09	4.24086e-05
METHANE		0	3.18768e-18	0	0.000394655	0.124547
INDOLE		0	0	0	0	0
FROMAMID		0	0	0	0	0
H2S		0	0	0	6.53389e-10	1.12682e-08
CH4S		0	0	0	0	0
BENZENE		0.0220198	0.0067299	0	2.68663e-10	2.17367e-08
PHENOL		0.010009	0.00407873	0	0	0
H2CO3		0	0	0	4.55592e-10	2.64568e-15
HCO3-		0.00040036	4.07873e-05	0	1.02729e-08	0
CO3-2		0.00040036	4.07873e-05	0	4.86172e-18	0
HS-		0	3.864e-06	0	0.00186256	0
CELLULOS		0	0	0	0.00532487	4.57306e-82
HEMECELL		0.00040036	4.07873e-05	0	0.00322719	4.96999e-10
GLUCOSE		0	0.00115873	0	0	0
TRIOLEIN		0	0	0	3.22719e-05	1.54818e-21
TRIPALM		0	1.41702e-06	0	3.22719e-05	1.43775e-20
PALM		0	0	0	3.0573e-06	1.77154e-12
SN-1--01		0	0.00497248	0	0	0
SN-1--02		0.0030027	0.00027213	0	3.22719e-05	1.40144e-17
XYLOSE		0.00180162	2.72429e-07	0	0.000916813	5.91169e-12
FURFURAL		0	0	0	0	0
LINOLEIC		0.0110099	0.0112165	0	1.12118e-06	4.44391e-14
STARCH		0	0	0	0	0
ETHANOL		0	0	0	0.00388729	0.00375417
PROTEIN		0	0	0	0.000224068	0.000458276
KERATIN		0	0	0	6.72902e-05	0.0168007
ACETATE		0	0	0	0.000135385	0
INERT		0	0	0	0.00887478	3.45319e-16
C3H5O2-		0	0	0	0.00235915	3.99031e-05
C5H9O2-		0	0	0	2.5532e-05	8.12276e-08
C4H7O2-		0	0	0	0.00127168	1.07187e-05
C18H33O2		0	0	0	0.000232706	7.28066e-12
C3H6NO3-		0	0	0	6.04559e-06	0
C5H10NO2		0	0	0	0	0
C5H8NO4-		0	0	0	1.92427e-08	6.73336e-15
ISOLE-01		0	0	0	2.09143e-08	1.79615e-87
PROLI-01		0	0	0	1.86215e-08	1.0031e-16
TYROS-01		0	0	0	2.21037e-12	4.09275e-22
TRYPT-01		0	0	0	1.08586e-19	8.17251e-24
ARGIN-01		0	0	0	2.05634e-14	6.84486e-15
LYSIN-01		0	0	0	1.65318e-16	3.11616e-21
PHENY-01		0	0	0	8.011e-12	4.62017e-18
METHI-01		0	0	0	6.48191e-20	1.25819e-93
THREO-01		0	0	0	2.63963e-20	1.00271e-93
ASPAR-01		0	0	0	1.83255e-17	1.12142e-93
C4H6NO4-		0	0	0	4.01257e-12	3.44604e-91
C6H13N2O		0	0	0	5.98909e-08	1.30043e-14
TYROS-02		0	0	0	1.77467e-05	3.28601e-15
TYROS-03		0	0	0	2.44311e-13	4.5237e-23
TRYPT-02		0	0	0	2.01882e-14	8.21304e-24
ARGIN-02		0	0	0	2.84522e-06	9.47077e-07
ARGIN-03		0	0	0	2.17011e-16	1.34435e-16
PHENY-02		0	0	0	0.000157817	9.10176e-11
METHI-02		0	0	0	1.47499e-14	1.26674e-93
THREO-02		0	0	0	1.17752e-14	1.01127e-93
AMMON(S)		0	0	0	0	0
NH4HS(S)		0	0	0	0.000623556	5.35518e-83
SALT1		0	0	0	0	0
S--		0	0	0	0	0
NH2COO		0	0	0	0	0
H3PO4		0	0	0	0.0050514	6.0462e-17
H2PO4-		0	2.19287e-05	0.452627	0.025316	0
HPO4--		0	0	0	5.62632e-09	0
PO4---		0	0	0	1.45915e-20	0
DIAMM-01		0	0	0	0	0
SALT3		0	0	0	0	0
K+		0	4.69879e-06	0.096987	0.0114253	0
KH2PO4		0	0	0	1.82906e-17	1.15529e-93
K2HPO4		0	0	0	0	0
K2CO3		0	0	0	0	0
KHCO3		0	7.24012e-06	0.149442	0	0
K3PO4		0	0	0	0	0
MG(OH)2		0	8.61039e-06	0.177726	0	0
MG++		0	0	0	0.00583517	0
STRUVITE		0	0	0	0	0
FE+++		0	5.96961e-06	0.123218	0	0
FE(OH)2		0	0	0	0	0
FE++		0	0	0	0.0180886	0
FE(OH)3		0.013875	0.0102231	8.33333e-07	6.79649e-06	5.83691e-85
FES					0	0
FECO3		-2.31039e+08			0	0
CA(OH)2		-2.03224e+06			0	0
CA++		-764281			0.011387	0
CACO3		-6722.69			0	0
HCL		0.0411507			7.0539e-10	3.64082e-08
CL-		4.6783			0.091845	0
Volume Flow	l/hr	-0.0101447			0.01763	0.392293
Vapor Phase		113.687
Molar Enthalpy	J/kmol	1.58072e-07				-2.86689e+08
Mass Enthalpy	J/kg					-8.56976e+06
Molar Entropy	J/kmol-K	0.000431297				-17224.1
Mass Entropy	J/kg-K					-514.868
Molar Density	kmol/cum					0.0371548
Mass Density	kg/cum	-2.88077e+08	-2.83718e+08	-6.04276e+08		1.24296
Enthalpy Flow	Watt	-1.51851e+07	-1.5207e+07	-6.02956e+06		-1.16074
Average MW		-167180	-156671	1.03038e+06		33.4535
Mole Flows	kmol/hr	-8812.41	-8397.41	10281.3		1.45756e-05
Mole Fractions		52.5612	51.5819	5.70723
Mass Flows	kg/day	997.138	962.364	571.973		0.0117025
Mass Fractions		-42.2019	-41.5588	-0.000798321
Liquid Phase		18.971	18.657	100.219
Molar Enthalpy	J/kmol	0.000527383	0.000527326	4.75603e-09	-2.26448e+08
Mass Enthalpy	J/kg				-1.09269e+07
Molar Entropy	J/kmol-K	0.24012	0.23612	1.14395e-05	7.78608e+37
Mass Entropy	J/kg-K				3.75704e+36
Molar Density	kmol/cum				34.0327
Mass Density	kg/cum				705.293
Enthalpy Flow	Watt				-37.7411
Average MW					20.724
Mole Flows	kmol/hr				0.000599997
Mole Fractions
Mass Flows	kg/day				0.298424
Mass Fractions

## Sheet: Soluble S
	Units	INPUT	LIQUID	NUTRIENT	S1	S2	Formula	Molecular Mass	S molar mass fraction	S Mol Flow	soluble										Molar Mass
Description
From			B1		B4	B4
To		B2	B4	B2
Stream Class		CONVEN	CONVEN	CONVEN	CONVEN	CONVEN
Maximum Relative Error
Cost Flow	$/sec
MIXED Substream
Phase			Liquid Phase	Liquid Phase	Liquid Phase	Vapor Phase
Temperature	K	296.15	328.15	296.15	328	328
Pressure	N/sqm	101325	101325	101325	101325	101325
Molar Vapor Fraction		0.000299639	0	0	0	1
Molar Liquid Fraction		0.9997	1	1	1	0
Molar Solid Fraction		0	0	0	0	0
Mass Vapor Fraction		0.00179295	0	0	0	1
Mass Liquid Fraction		0.998207	1	1	1	1.44329e-15
Mass Solid Fraction		0	0	0	0	0
Molar Enthalpy	J/kmol	-2.8806e+08	-2.83718e+08	-6.04276e+08	-4.15427e+10	-2.10227e+08
Mass Enthalpy	J/kg	-1.51615e+07	-1.5207e+07	-6.02956e+06	-2.1962e+09	-7.74176e+06
Molar Entropy	J/kmol-K	-167359	-156671	1.03038e+06		-39940.2
Mass Entropy	J/kg-K	-8808.66	-8397.41	10281.3		-1470.82
Molar Density	kmol/cum	38.021	51.5819	5.70723	50.2494	0.0371548
Mass Density	kg/cum	722.375	962.364	571.973	950.501	1.00894
Enthalpy Flow	Watt	-42.2121	-41.5588	-0.000798321	-6118.1	-0.424266
Average MW		18.9994	18.657	100.219	18.9157	27.155
Mole Flows	mol/hr	0.527541	0.527326	4.75603e-06	0.66226	0.00624859	Alias	g/mol			non soluble										N	14
WATER	mol/hr	0.523448	0.521206	0	0.534726	0.000777908	H2O	18	0	0			S								C	12
GLYCEROL	mol/hr	0	6.35264e-06	0	6.35264e-06	2.58898e-13	C3H8O3	92	0	0			Soluble flow (mol/hr)	0.00319646							H	1
OLEIC-AC	mol/hr	0	1.00723e-07	0	8.16623e-14	4.17371e-23	C18H34O2	282	0	0			Non-Soluble flow (mol/hr)	1.00294e-05							O	16
DEXTROSE	mol/hr	0.000556845	2.18952e-07	0	2.18952e-07	4.20247e-20	C6H12O6	180	0	0			Soluble mol frac (%)	0.48266							S	32
ACETI-AC	mol/hr	0	3.18543e-05	0	1.96672e-14	3.56576e-17	C2H4O2	60	0	0			Non-Soluble mol frac (%)	0.00151443							Fe	56
PROPI-01	mol/hr	0	0.000487717	0	3.97804e-13	4.57917e-16	C3H6O2	74	0	0			Soluble concentration (mol/l)	0.181308							Ca	40
ISOBU-01	mol/hr	0	0.000342575	0	1.90331e-10	1.78105e-14	C4H8O2	88	0	0			Non soluble concentration (mol/l)	0.000568884							P	31
ISOVA-01	mol/hr	0	8.39815e-10	0	7.91568e-15	4.08163e-18	C5H10O2	102	0	0			pH	12.3417	12.8196						K	39
H+	mol/hr	0	0	0	8.02707e-15	0	H+	1	0	0				H+	OH-						Mg	24
OH-	mol/hr	0	0	0	0.00116377	0	OH-	17	0	0			Molar Flow	8.02707e-15	0.00116377
NH3	mol/hr	5.89058e-05	0.000106922	0	0.0261355	0.00110869	H3N	17	0	0			Volume Flow	0.01763	0.01763
NH4+	mol/hr	0	0	0	5.59404e-15	0	NH4+	18	0	0			Concentration	4.55307e-13	0.0660105	3.0055e-14
CO2	mol/hr	0	0.00128985	0	0.000653386	0.00088532	CO2	14	0	0
C5H7NO2	mol/hr	0	0.000168959	0	0.000168959	2.92421e-09	C5H7NO2	113	0	0
ARGININE	mol/hr	0	3.49022e-06	0	5.41222e-14	1.92506e-22	C6H14N4O2	174	0	0
HISTIDIN	mol/hr	0	2.84238e-22	0	0	0	C6H8N3O2	155	0	0
LYSINE	mol/hr	0	5.10521e-22	0	5.26319e-12	1.86795e-20	C6H14N2O2	146	0	0
TYROSINE	mol/hr	0	2.47354e-21	0	7.23454e-12	1.01571e-92	C9H11NO3	181	0	0
TRYPTOPH	mol/hr	0	2.5256e-23	0	5.25841e-12	7.38269e-93	C11H12N2O2	204	0	0
PHENYLAL	mol/hr	0	2.79235e-06	0	4.30028e-11	4.05373e-19	C9H11NO2	165	0	0
CYSTEINE	mol/hr	0	5.19688e-06	0	5.19688e-06	4.57649e-16	C3H6NO2S	121	0.264463	1.37438e-06
METHIONI	mol/hr	0	1.06268e-20	0	5.22655e-12	7.33796e-93	C5H11NO2S	149	0.214765	1.12248e-12
THREONIN	mol/hr	0	3.64534e-06	0	5.30331e-12	7.44573e-93	C4H9NO3	119	0	0
SERINE	mol/hr	0	1.33412e-05	0	2.11283e-14	2.96636e-95	C3H7NO3	105	0	0
LEUCINE	mol/hr	0	5.42957e-06	0	5.42957e-06	7.623e-87	C6H13NO2	131	0	0
ISOLEUCI	mol/hr	0	3.56801e-06	0	9.67479e-14	1.35832e-94	C6H13NO2	131	0	0
VALINE	mol/hr	0	5.73984e-06	0	2.08799e-14	2.93149e-95	C5H11NO2	117	0	0
GLUTAMIC	mol/hr	0	5.73947e-06	0	9.95687e-14	5.69477e-22	C5H9NO4	147	0	0
ASPARTIC	mol/hr	0	3.72314e-06	0	2.62913e-11	3.69124e-92	C4H7NO4	133	0	0
GLYCINE	mol/hr	0	1.93901e-05	0	1.93901e-05	1.70712e-15	C2H5NO2	75	0	0
ALANINE	mol/hr	0	3.64557e-06	0	3.64557e-06	5.1183e-87	C3H7NO2	89	0	0
PROLINE	mol/hr	0	8.60975e-06	0	1.18751e-13	1.04575e-23	C5H9NO2	115	0	0
HYDROGEN	mol/hr	0	6.44532e-08	0	7.56428e-08	1.02139e-05	H2	2	0	0
METHANE	mol/hr	0	0.000578623	0	0.000664276	0.00342711	CH4	16	0	0
INDOLE	mol/hr	0	6.78531e-23	0	0	0	C8H7N	117	0	0
FROMAMID	mol/hr	0	3.5663e-22	0	0	0	CH3NO	45	0	0
H2S	mol/hr	0	5.57738e-05	0	2.48975e-10	7.20634e-11	H2S	34	0.941176	2.34329e-10
CH4S	mol/hr	0	1.71518e-21	0	0	0	CH4S	48	0	0
BENZENE	mol/hr	0	2.00614e-11	0	1.2312e-10	5.53319e-11	C6H6	78	0	0
PHENOL	mol/hr	0	3.33232e-19	0	0	0	C6H6O	94	0	0
H2CO3	mol/hr	0	0	0	7.71731e-13	7.32635e-20	H2CO3	62	0	0
HCO3-	mol/hr	0	0	0	0.0171247	0	HCO3-	61	0	0
CO3-2	mol/hr	0	0	0	0.0071455	0	CO3--	60	0	0
HS-	mol/hr	0	0	0	0.00329493	0	HS-	33	0.969697	0.00319509
CELLULOS	mol/hr	0.00136117	0.000408352	0	0.000408352	5.73317e-85	C6H10O5	162	0	0
HEMECELL	mol/hr	0.000759331	0.000303732	0	0.000303732	7.64687e-13	C5H8O4	132	0	0
GLUCOSE	mol/hr	0	0	0	0	0	C6H12O6	180	0	0
TRIOLEIN	mol/hr	4.53207e-06	4.53207e-07	0	4.53207e-07	3.55431e-25	C57H104O6	884	0	0
TRIPALM	mol/hr	4.97567e-06	4.97567e-07	0	4.97567e-07	3.62387e-24	C51H98O6	806	0	0
PALM	mol/hr	0	1.48414e-07	0	1.48414e-07	1.40588e-15	C16H34O	242	0	0
SN-1--01	mol/hr	0	0	0	0	0	C37H70O5	594	0	0
SN-1--02	mol/hr	6.77082e-06	6.77082e-07	0	6.77082e-07	4.80676e-21	C37H68O5	592	0	0
XYLOSE	mol/hr	0	7.59331e-05	0	7.59331e-05	8.00431e-15	C5H10O5	150	0	0
FURFURAL	mol/hr	0	0	0	0	0	C5H4O2	96	0	0
LINOLEIC	mol/hr	0	4.97097e-08	0	4.97097e-08	3.22102e-17	C18H32O2	280	0	0
STARCH	mol/hr	0	0	0	0	0	C6H10O5	162	0	0
ETHANOL	mol/hr	0	0.00106191	0	0.00107688	1.206e-05	C2H6O	62	0	0
PROTEIN	mol/hr	8.19116e-05	7.28678e-06	0	7.97696e-06	2.142e-07	C13H25O7N3S	367	0.0871935	6.95539e-07
KERATIN	mol/hr	0.000155141	2.30273e-08	0	5.06851e-05	2.68852e-05	C(4.89)H8NO(2.1)S(0.67)	116.424	0.184154	9.33389e-06
ACETATE	mol/hr	0	0	0	3.19502e-05	0	CH3COO-	59	0	0
INERT	mol/hr	0.00110352	0.00110352	0	0.00110352	1.20651e-19	INERT	x	0	0
C3H5O2-	mol/hr	0	0	0	0.000488691	1.35128e-07	C3H5O2-	73	0	0
C5H9O2-	mol/hr	0	0	0	1.25379e-08	6.52088e-13	C5H9O2-	101	0	0
C4H7O2-	mol/hr	0	0	0	0.000342712	4.72231e-08	C4H7O2-	87	0	0
C18H33O2	mol/hr	0	0	0	1.17494e-07	6.00954e-17	C18H33O2	281	0	0
C3H6NO3-	mol/hr	0	0	0	1.10751e-12	0	C3H6NO3-	104	0	0
C5H10NO2	mol/hr	0	0	0	1.28201e-12	1.79991e-93	C5H10NO2-	116	0	0
C5H8NO4-	mol/hr	0	0	0	3.7232e-06	2.12983e-14	C5H8NO4-	146	0	0
ISOLE-01	mol/hr	0	0	0	3.96688e-06	5.56941e-87	C6H12NO2-	130	0	0
PROLI-01	mol/hr	0	0	0	4.26001e-06	3.75146e-16	C5H8NO2-	114	0	0
TYROS-01	mol/hr	0	0	0	1.45216e-12	4.39569e-24	C9H10NO3-	164	0	0
TRYPT-01	mol/hr	0	0	0	7.46874e-13	4.96725e-24	C11H11N2O2-	203	0	0
ARGIN-01	mol/hr	0	0	0	4.96823e-10	2.70354e-12	C6H13N4O2-	173	0	0
LYSIN-01	mol/hr	0	0	0	5.41432e-14	1.92191e-22	C6H13N2O2-	145	0	0
PHENY-01	mol/hr	0	0	0	6.58983e-12	6.21308e-20	C9H10NO2-	164	0	0
METHI-01	mol/hr	0	0	0	1.09076e-12	1.53141e-93	C5H10NO2S-	148	0.216216	2.35841e-13
THREO-01	mol/hr	0	0	0	7.06102e-14	9.91351e-95	C4H8NO3-	118	0	0
ASPAR-01	mol/hr	0	0	0	8.15852e-13	1.14544e-93	C4H6NO4-	132	0	0
C4H6NO4-	mol/hr	0	0	0	8.65134e-12	1.21463e-92	C4H6NO4-	132	0	0
C6H13N2O	mol/hr	0	0	0	1.7265e-10	6.12852e-19	C6H13N2O2-	145	0	0
TYROS-02	mol/hr	0	0	0	1.60665e-07	4.86332e-19	C9H10NO3-	164	0	0
TYROS-03	mol/hr	0	0	0	1.61304e-13	4.88268e-25	C9H10NO3-	164	0	0
TRYPT-02	mol/hr	0	0	0	5.14031e-11	3.41867e-22	C11H11N2O2-	173	0	0
ARGIN-02	mol/hr	0	0	0	5.16033e-07	2.80807e-09	C6H13N4O2-	173	0	0
ARGIN-03	mol/hr	0	0	0	1.16022e-13	6.31351e-16	C6H13N4O2-	173	0	0
PHENY-02	mol/hr	0	0	0	1.03501e-06	9.75833e-15	C9H10NO2-	164	0	0
METHI-02	mol/hr	0	0	0	3.73719e-11	5.24693e-92	C5H10NO2S-	148	0.216216	8.08041e-12
THREO-02	mol/hr	0	0	0	2.66755e-07	3.74518e-88	C4H8NO3	118	0	0
AMMON(S)	mol/hr	0	0	0	0	0	NH2COONH4	78	0	0
NH4HS(S)	mol/hr	0	0	0	1.57387e-08	2.20968e-89	NH4HS	51	0	0
SALT1	mol/hr	0	0	0	0.000197552	2.77358e-85	NH4HCO3	79	0	0
S--	mol/hr	0	0	0	0	0	S-2	32	1	0
NH2COO	mol/hr	0	0	0	2.77389e-15	0	NH2COO-	230	0	0
H3PO4	mol/hr	0	0	0	2.07128e-14	4.05294e-30	H3PO4	98	0	0
H2PO4-	mol/hr	0	0	0	3.37566e-06	0	H2PO4-	97	0	0
HPO4--	mol/hr	0	0	0	8.97405e-10	0	HPO4-2	96	0	0
PO4---	mol/hr	0	0	0	4.03311e-06	0	PO4-3	95	0	0
DIAMM-01	mol/hr	0	0	0	0	0	(NH4)2HPO4	132	0	0
SALT3	mol/hr	0	0	0	0	0	NH6PO4	115	0	0
K+	mol/hr	0	0	0	3.75789e-10	0	K+	39	0	0
KH2PO4	mol/hr	0	1.58534e-06	1.58534e-06	0.0104421	1.46605e-83	KH2PO4	136	0	0
K2HPO4	mol/hr	0	0	0	0.00031258	4.38855e-85	K2HPO4	270	0	0
K2CO3	mol/hr	0	0	0	0	0	K2CO3	138	0	0
KHCO3	mol/hr	0	0	0	0	0	KHCO3	100	0	0
K3PO4	mol/hr	0	0	0	0	0	K3PO4	249	0	0
MG(OH)2	mol/hr	0	7.92671e-07	7.92671e-07	7.29526e-05	1.02424e-85	MG(OH)2	58	0	0
MG++	mol/hr	0	0	0	0.00889245	0	MG+2	24	0	0
STRUVITE	mol/hr	0	0	0	0	0	NH4MgPO4.6H2O	245	0	0
FE+++	mol/hr	0	0	0	0	0	FE+3	56	0	0
FE(OH)2	mol/hr	0	7.92671e-07	7.92671e-07	9.55588e-05	1.34162e-85	FE(OH)2	90	0	0
FE++	mol/hr	0	0	0	0.00947431	0	FE+2	56	0	0
FE(OH)3	mol/hr	0	7.92671e-07	7.92671e-07	7.90778e-07	1.11024e-87	FE(OH)3	107	0	0
FES	mol/hr	0	0	0	0	0	FES	88	0.363636	0
FECO3	mol/hr	0	0	0	4.72066e-20	1.87714e-96	FECO3	116	0	0
CA(OH)2	mol/hr	0	7.92671e-07	7.92671e-07	5.9927e-05	8.41362e-86	CA(OH)2	74	0	0
CA++	mol/hr	0	0	0	0.00825062	0	CA+2	40	0	0
CACO3	mol/hr	0	0	0	0	0	CACO3	100	0	0
HCL	mol/hr				2.84722e-09	2.40244e-09
CL-	mol/hr	0.992241	0.988393	0	0.0294301	0
Mole Fractions		0	1.20469e-05	0
WATER		0	1.91008e-07	0	0.807426	0.124493
GLYCEROL		0.00105555	4.15211e-07	0	9.59237e-06	4.14331e-11
OLEIC-AC		0	6.04073e-05	0	1.23309e-13	6.67944e-21
DEXTROSE		0	0.000924887	0	3.30614e-07	6.72548e-18
ACETI-AC		0	0.000649644	0	2.9697e-14	5.7065e-15
PROPI-01		0	1.59259e-09	0	6.00677e-13	7.32833e-14
ISOBU-01		0	0	0	2.87396e-10	2.85032e-12
ISOVA-01		0	0	0	1.19525e-14	6.53208e-16
H+		0.000111661	0.000202763	0	1.21207e-14	0
OH-		0	0	0	0.00175727	0
NH3		0	0.00244602	0	0.0394641	0.17743
NH4+		0	0.000320406	0	8.4469e-15	0
CO2		0	6.6187e-06	0	0.000986601	0.141683
C5H7NO2		0	5.39017e-22	0	0.000255125	4.6798e-07
ARGININE		0	9.68131e-22	0	8.17236e-14	3.08079e-20
HISTIDIN		0	4.69072e-21	0	0	0
LYSINE		0	4.78945e-23	0	7.94732e-12	2.98939e-18
TYROSINE		0	5.2953e-06	0	1.0924e-11	1.62551e-90
TRYPTOPH		0	9.85514e-06	0	7.9401e-12	1.1815e-90
PHENYLAL		0	2.01522e-20	0	6.49334e-11	6.48744e-17
CYSTEINE		0	6.91287e-06	0	7.84719e-06	7.32404e-14
METHIONI		0	2.52998e-05	0	7.89199e-12	1.17434e-90
THREONIN		0	1.02964e-05	0	8.00791e-12	1.19159e-90
SERINE		0	6.76622e-06	0	3.19033e-14	4.74725e-93
LEUCINE		0	1.08848e-05	0	8.19856e-06	1.21996e-84
ISOLEUCI		0	1.08841e-05	0	1.46087e-13	2.1738e-92
VALINE		0	7.0604e-06	0	3.15283e-14	4.69145e-93
GLUTAMIC		0	3.67706e-05	0	1.50347e-13	9.11369e-20
ASPARTIC		0	6.91331e-06	0	3.96994e-11	5.90732e-90
GLYCINE		0	1.63272e-05	0	2.92787e-05	2.732e-13
ALANINE		0	1.22226e-07	0	5.50475e-06	8.19113e-85
PROLINE		0	0.00109728	0	1.79312e-13	1.67358e-21
HYDROGEN		0	1.28674e-22	0	1.14219e-07	0.00163459
METHANE		0	6.76299e-22	0	0.00100304	0.548461
INDOLE		0	0.000105767	0	0	0
FROMAMID		0	3.2526e-21	0	0	0
H2S		0	3.80436e-11	0	3.75948e-10	1.15328e-08
CH4S		0	6.31928e-19	0	0	0
BENZENE		0	0	0	1.85909e-10	8.85511e-09
PHENOL		0	0	0	0	0
H2CO3		0	0	0	1.1653e-12	1.17248e-17
HCO3-		0	0	0	0.025858	0
CO3-2		0.00258022	0.000774381	0	0.0107896	0
HS-		0.00143938	0.000575985	0	0.00497529	0
CELLULOS		0	0	0	0.000616603	9.17514e-83
HEMECELL		8.59094e-06	8.59444e-07	0	0.00045863	1.22378e-10
GLUCOSE		9.4318e-06	9.43565e-07	0	0	0
TRIOLEIN		0	2.81445e-07	0	6.84335e-07	5.68818e-23
TRIPALM		0	0	0	7.51317e-07	5.79951e-22
PALM		1.28347e-05	1.28399e-06	0	2.24102e-07	2.24992e-13
SN-1--01		0	0.000143996	0	0	0
SN-1--02		0	0	0	1.02238e-06	7.69255e-19
XYLOSE		0	9.42674e-08	0	0.000114658	1.28098e-12
FURFURAL		0	0	0	0	0
LINOLEIC		0	0.00201375	0	7.50608e-08	5.15479e-15
STARCH		0.00015527	1.38183e-05	0	0	0
ETHANOL		0.000294082	4.36679e-08	0	0.00162607	0.00193004
PROTEIN		0	0	0	1.20451e-05	3.42798e-05
KERATIN		0.00209181	0.00209267	0	7.65336e-05	0.0043026
ACETATE		0	0	0	4.82443e-05	0
INERT		0	0	0	0.00166629	1.93086e-17
C3H5O2-		0	0	0	0.000737914	2.16254e-05
C5H9O2-		0	0	0	1.8932e-08	1.04358e-10
C4H7O2-		0	0	0	0.000517489	7.55741e-06
C18H33O2		0	0	0	1.77414e-07	9.61744e-15
C3H6NO3-		0	0	0	1.67232e-12	0
C5H10NO2		0	0	0	1.93581e-12	2.88051e-91
C5H8NO4-		0	0	0	5.62197e-06	3.40849e-12
ISOLE-01		0	0	0	5.98992e-06	8.91307e-85
PROLI-01		0	0	0	6.43254e-06	6.0037e-14
TYROS-01		0	0	0	2.19274e-12	7.03469e-22
TRYPT-01		0	0	0	1.12777e-12	7.94939e-22
ARGIN-01		0	0	0	7.50193e-10	4.32664e-10
LYSIN-01		0	0	0	8.17552e-14	3.07575e-20
PHENY-01		0	0	0	9.95052e-12	9.94318e-18
METHI-01		0	0	0	1.64703e-12	2.45081e-91
THREO-01		0	0	0	1.0662e-13	1.58652e-92
ASPAR-01		0	0	0	1.23192e-12	1.83312e-91
C4H6NO4-		0	0	0	1.30634e-11	1.94385e-90
C6H13N2O		0	0	0	2.60698e-10	9.80785e-17
TYROS-02		0	0	0	2.42601e-07	7.78307e-17
TYROS-03		0	0	0	2.43567e-13	7.81405e-23
TRYPT-02		0	0	0	7.76177e-11	5.47111e-20
ARGIN-02		0	0	0	7.79201e-07	4.49393e-07
ARGIN-03		0	0	0	1.75191e-13	1.01039e-13
PHENY-02		0	0	0	1.56284e-06	1.56169e-12
METHI-02		0	0	0	5.64309e-11	8.39699e-90
THREO-02		0	0	0	4.02795e-07	5.99364e-86
AMMON(S)		0	0	0	0	0
NH4HS(S)		0	0	0	2.37652e-08	3.53629e-87
SALT1		0	0	0	0.0002983	4.43874e-83
S--		0	0	0	0	0
NH2COO		0	0	0	4.18852e-15	0
H3PO4		0	0	0	3.12759e-14	6.48618e-28
H2PO4-		0	0	0	5.09719e-06	0
HPO4--		0	0	0	1.35507e-09	0
PO4---		0	0	0	6.08992e-06	0
DIAMM-01		0	0	0	0	0
SALT3		0	3.00638e-06	0.333333	0	0
K+		0	0	0	5.67434e-10	0
KH2PO4		0	0	0	0.0157674	2.3462e-81
K2HPO4		0	0	0	0.00047199	7.02327e-83
K2CO3		0	0	0	0	0
KHCO3		0	1.50319e-06	0.166667	0	0
K3PO4		0	0	0	0	0
MG(OH)2		0	0	0	0.000110157	1.63915e-83
MG++		0	0	0	0.0134274	0
STRUVITE		0	1.50319e-06	0.166667	0	0
FE+++		0	0	0	0	0
FE(OH)2		0	1.50319e-06	0.166667	0.000144292	2.14709e-83
FE++		0	0	0	0.014306	0
FE(OH)3		0	0	0	1.19406e-06	1.77678e-85
FES		0	1.50319e-06	0.166667	0	0
FECO3		0	0	0	7.12811e-20	3.00411e-94
CA(OH)2		0	0	0	9.04887e-05	1.34648e-83
CA++		0.240551	0.23612	1.14395e-05	0.0124583	0
CACO3		0.226322	0.225352	0	0	0
HCL		0	1.40411e-05	0	4.29926e-09	3.84478e-07
CL-		0	6.82808e-07	0	0.044439	0
Mass Flows	kg/day	0.00240768	9.46701e-07	0	0.377487	0.00313531
WATER	kg/day	0	4.59104e-05	0	0.231198	0.000336341
GLYCEROL	kg/day	0	0.000867116	0	1.40411e-05	5.72236e-13
OLEIC-AC	kg/day	0	0.000724392	0	5.53592e-13	2.82937e-22
DEXTROSE	kg/day	0	2.05855e-09	0	9.46701e-07	1.81706e-19
ACETI-AC	kg/day	0	0	0	2.83455e-14	5.13919e-17
PROPI-01	kg/day	0	0	0	7.07258e-13	8.14134e-16
ISOBU-01	kg/day	2.40768e-05	4.37027e-05	0	4.02464e-10	3.76612e-14
ISOVA-01	kg/day	0	0	0	1.94029e-14	1.00049e-17
H+	kg/day	0	0.00136239	0	1.9265e-16	0
OH-	kg/day	0	0.000458687	0	0.000475022	0
NH3	kg/day	0	1.45921e-05	0	0.0106824	0.000453158
NH4+	kg/day	0	1.05156e-21	0	2.4218e-15	0
CO2	kg/day	0	1.79119e-21	0	0.00069013	0.000935106
C5H7NO2	kg/day	0	1.07564e-20	0	0.000458688	7.93861e-09
ARGININE	kg/day	0	1.23792e-22	0	2.26278e-13	8.04842e-22
HISTIDIN	kg/day	0	1.10706e-05	0	0	0
LYSINE	kg/day	0	1.4986e-05	0	1.84661e-11	6.55378e-20
TYROSINE	kg/day	0	3.8056e-20	0	3.146e-11	4.41692e-92
TRYPTOPH	kg/day	0	1.04216e-05	0	2.5774e-11	3.61862e-92
PHENYLAL	kg/day	0	3.36499e-05	0	1.70489e-10	1.60715e-18
CYSTEINE	kg/day	0	1.70934e-05	0	1.4986e-05	1.3197e-15
METHIONI	kg/day	0	1.12328e-05	0	1.8717e-11	2.62782e-92
THREONIN	kg/day	0	1.61378e-05	0	1.51616e-11	2.12865e-92
SERINE	kg/day	0	2.02669e-05	0	5.32906e-14	7.48189e-95
LEUCINE	kg/day	0	1.18935e-05	0	1.70934e-05	2.39987e-86
ISOLEUCI	kg/day	0	3.49335e-05	0	3.04581e-13	4.27625e-94
VALINE	kg/day	0	7.79517e-06	0	5.87049e-14	8.24203e-95
GLUTAMIC	kg/day	0	2.37902e-05	0	3.51591e-13	2.0109e-21
ASPARTIC	kg/day	0	3.11832e-09	0	8.39874e-11	1.17917e-91
GLYCINE	kg/day	0	0.000222785	0	3.49335e-05	3.07556e-15
ALANINE	kg/day	0	1.90776e-22	0	7.79517e-06	1.09443e-86
PROLINE	kg/day	0	3.85511e-22	0	3.2813e-13	2.88958e-23
HYDROGEN	kg/day	0	4.5621e-05	0	3.65969e-09	4.9416e-07
METHANE	kg/day	0	1.98036e-21	0	0.000255764	0.00131953
INDOLE	kg/day	0	3.76097e-11	0	0	0
FROMAMID	kg/day	0	7.52676e-19	0	0	0
H2S	kg/day	0	0	0	2.03653e-10	5.89454e-11
CH4S	kg/day	0	0	0	0	0
BENZENE	kg/day	0	0	0	2.30816e-10	1.03732e-10
PHENOL	kg/day	0	0	0	0	0
H2CO3	kg/day	0.00529689	0.00158907	0	1.1488e-12	1.0906e-19
HCO3-	kg/day	0.00240768	0.000963071	0	0.0250776	0
CO3-2	kg/day	0	0	0	0.0102911	0
HS-	kg/day	9.63071e-05	9.63071e-06	0	0.00261543	0
CELLULOS	kg/day	9.63071e-05	9.63071e-06	0	0.00158907	2.23101e-84
HEMECELL	kg/day	0	9.12369e-07	0	0.000963071	2.42466e-12
GLUCOSE	kg/day	0	0	0	0	0
TRIOLEIN	kg/day	9.63071e-05	9.63071e-06	0	9.63071e-06	7.55295e-24
TRIPALM	kg/day	0	0.000273599	0	9.63071e-06	7.01423e-23
PALM	kg/day	0	0	0	9.12369e-07	8.64263e-15
SN-1--01	kg/day	0	3.34587e-07	0	0	0
SN-1--02	kg/day	0	0	0	9.63071e-06	6.83706e-20
XYLOSE	kg/day	0	0.0011741	0	0.000273599	2.88408e-14
FURFURAL	kg/day	0.000722303	6.42554e-05	0	0	0
LINOLEIC	kg/day	0.000433382	6.43261e-08	0	3.34587e-07	2.16801e-16
STARCH	kg/day	0	0	0	0	0
ETHANOL	kg/day	0.00264844	0.00264844	0	0.00119066	1.33342e-05
PROTEIN	kg/day	0	0	0	7.03415e-05	1.88884e-06
KERATIN	kg/day	0	0	0	0.000141588	7.51032e-05
ACETATE	kg/day	0	0	0	4.52758e-05	0
INERT	kg/day	0	0	0	0.00264844	2.89563e-19
C3H5O2-	kg/day	0	0	0	0.000857025	2.36977e-07
C5H9O2-	kg/day	0	0	0	3.04296e-08	1.58262e-12
C4H7O2-	kg/day	0	0	0	0.000716392	9.87133e-08
C18H33O2	kg/day	0	0	0	7.96498e-07	4.07389e-16
C3H6NO3-	kg/day	0	0	0	2.76664e-12	0
C5H10NO2	kg/day	0	0	0	3.57342e-12	5.017e-93
C5H8NO4-	kg/day	0	0	0	1.30571e-05	7.46919e-14
ISOLE-01	kg/day	0	0	0	1.23925e-05	1.73989e-86
PROLI-01	kg/day	0	0	0	1.16681e-05	1.02752e-15
TYROS-01	kg/day	0	0	0	6.27973e-12	1.90087e-23
TRYPT-01	kg/day	0	0	0	3.64273e-12	2.42267e-23
ARGIN-01	kg/day	0	0	0	2.06513e-09	1.12377e-11
LYSIN-01	kg/day	0	0	0	1.88654e-13	6.69662e-22
PHENY-01	kg/day	0	0	0	2.59667e-11	2.44821e-19
METHI-01	kg/day	0	0	0	3.87978e-12	5.44713e-93
THREO-01	kg/day	0	0	0	2.00159e-13	2.81018e-94
ASPAR-01	kg/day	0	0	0	2.5865e-12	3.63139e-93
C4H6NO4-	kg/day	0	0	0	2.76367e-11	3.88013e-92
C6H13N2O	kg/day	0	0	0	6.0575e-10	2.15022e-18
TYROS-02	kg/day	0	0	0	6.98665e-07	2.11486e-18
TYROS-03	kg/day	0	0	0	7.01447e-13	2.12328e-24
TRYPT-02	kg/day	0	0	0	2.51951e-10	1.67566e-21
ARGIN-02	kg/day	0	0	0	2.15747e-06	1.17402e-08
ARGIN-03	kg/day	0	0	0	4.85073e-13	2.6396e-15
PHENY-02	kg/day	0	0	0	4.10339e-06	3.86879e-14
METHI-02	kg/day	0	0	0	1.33834e-10	1.879e-91
THREO-02	kg/day	0	0	0	7.62623e-07	1.07071e-87
AMMON(S)	kg/day	0	0	0	0	0
NH4HS(S)	kg/day	0	0	0	1.93067e-08	2.71062e-89
SALT1	kg/day	0	0	0	0.000374822	5.26242e-85
S--	kg/day	0	0	0	0	0
NH2COO	kg/day	0	0	0	3.9966e-15	0
H3PO4	kg/day	0	0	0	4.8714e-14	9.53205e-30
H2PO4-	kg/day	0	0	0	7.85755e-06	0
HPO4--	kg/day	0	0	0	2.0672e-09	0
PO4---	kg/day	0	5.17781e-06	5.17781e-06	9.19288e-06	0
DIAMM-01	kg/day	0	0	0	0	0
SALT3	kg/day	0	0	0	0	0
K+	kg/day	0	0	0	3.5262e-10	0
KH2PO4	kg/day	0	0	0	0.0341044	4.78818e-83
K2HPO4	kg/day	0	1.10948e-06	1.10948e-06	0.00130665	1.83451e-84
K2CO3	kg/day	0	0	0	0	0
KHCO3	kg/day	0	0	0	0	0
K3PO4	kg/day	0	0	0	0	0
MG(OH)2	kg/day	0	1.70954e-06	1.70954e-06	0.00010211	1.4336e-85
MG++	kg/day	0	0	0	0.00518691	0
STRUVITE	kg/day	0	2.03309e-06	2.03309e-06	0	0
FE+++	kg/day	0	0	0	0	0
FE(OH)2	kg/day	0	0	0	0.00020609	2.89346e-85
FE++	kg/day	0	1.40955e-06	1.40955e-06	0.0126984	0
FE(OH)3	kg/day	0	0	0	2.02823e-06	2.84759e-87
FES	kg/day	0	0	0	0	0
FECO3	kg/day				1.3126e-19	5.21948e-96
CA(OH)2	kg/day	0.940847	0.954395	0	0.000106564	1.49613e-85
CA++	kg/day	0	5.94657e-05	0	0.00793582	0
CACO3	kg/day	0	2.89178e-06	0	0	0
HCL	kg/day	0.010009	4.0094e-06	0	2.49148e-09	2.10227e-09
CL-	kg/day	0	0.000194437	0	0.0250415	0
Mass Fractions		0	0.00367235	0
WATER		0	0.00306789	0	0.0233307	0.168177
GLYCEROL		0	8.71823e-09	0
OLEIC-AC		0	0	0		-1.35213e+08
DEXTROSE		0	0	0		-6.46743e+06
ACETI-AC		0.00010009	0.000185087	0		-56359.8
PROPI-01		0	0	0		-2695.76
ISOBU-01		0	0.00576989	0		0.0371548
ISOVA-01		0	0.0019426	0		0.776789
H+		0	6.17996e-05	0		-0.234692
OH-		0	4.45347e-21	0		20.9068
NH3		0	7.58591e-21	0		6.24859e-06
NH4+		0	4.55548e-20	0
CO2		0	5.24276e-22	0		0.00313531
C5H7NO2		0	4.68853e-05	0
ARGININE		0	6.34676e-05	0
HISTIDIN		0	1.61172e-19	0	-4.59416e+07
LYSINE		0	4.41369e-05	0	-1.93439e+06
TYROSINE		0	0.000142511	0	1.06482e+38
TRYPTOPH		0	7.23925e-05	0	4.48346e+36
PHENYLAL		0	4.75722e-05	0	28.3857
CYSTEINE		0	6.83458e-05	0	674.159
METHIONI		0	8.58328e-05	0	-8.45146
THREONIN		0	5.03707e-05	0	23.7499
SERINE		0	0.000147948	0	0.00066226
LEUCINE		0	3.30136e-05	0
ISOLEUCI		0	0.000100755	0	0.377487
VALINE		0	1.32065e-08	0	3.31059e-14	2.84318e-93
GLUTAMIC		0	0.000943523	0	0.0011343	3.96845e-10
ASPARTIC		0	8.07962e-22	0	1.81777e-12	1.56112e-91
GLYCINE		0	1.63269e-21	0	0.00011706	6.3042e-13
ALANINE		0	0.000193211	0	2.61212e-05	2.24332e-84
PROLINE		0	8.3871e-21	0	0.00109433	5.89489e-12
HYDROGEN		0	1.59282e-10	0	5.13444e-09	4.24086e-05
METHANE		0	3.18768e-18	0	0.000394655	0.124547
INDOLE		0	0	0	0	0
FROMAMID		0	0	0	0	0
H2S		0	0	0	6.53389e-10	1.12682e-08
CH4S		0	0	0	0	0
BENZENE		0.0220198	0.0067299	0	2.68663e-10	2.17367e-08
PHENOL		0.010009	0.00407873	0	0	0
H2CO3		0	0	0	4.55592e-10	2.64568e-15
HCO3-		0.00040036	4.07873e-05	0	1.02729e-08	0
CO3-2		0.00040036	4.07873e-05	0	4.86172e-18	0
HS-		0	3.864e-06	0	0.00186256	0
CELLULOS		0	0	0	0.00532487	4.57306e-82
HEMECELL		0.00040036	4.07873e-05	0	0.00322719	4.96999e-10
GLUCOSE		0	0.00115873	0	0	0
TRIOLEIN		0	0	0	3.22719e-05	1.54818e-21
TRIPALM		0	1.41702e-06	0	3.22719e-05	1.43775e-20
PALM		0	0	0	3.0573e-06	1.77154e-12
SN-1--01		0	0.00497248	0	0	0
SN-1--02		0.0030027	0.00027213	0	3.22719e-05	1.40144e-17
XYLOSE		0.00180162	2.72429e-07	0	0.000916813	5.91169e-12
FURFURAL		0	0	0	0	0
LINOLEIC		0.0110099	0.0112165	0	1.12118e-06	4.44391e-14
STARCH		0	0	0	0	0
ETHANOL		0	0	0	0.00388729	0.00375417
PROTEIN		0	0	0	0.000224068	0.000458276
KERATIN		0	0	0	6.72902e-05	0.0168007
ACETATE		0	0	0	0.000135385	0
INERT		0	0	0	0.00887478	3.45319e-16
C3H5O2-		0	0	0	0.00235915	3.99031e-05
C5H9O2-		0	0	0	2.5532e-05	8.12276e-08
C4H7O2-		0	0	0	0.00127168	1.07187e-05
C18H33O2		0	0	0	0.000232706	7.28066e-12
C3H6NO3-		0	0	0	6.04559e-06	0
C5H10NO2		0	0	0	0	0
C5H8NO4-		0	0	0	1.92427e-08	6.73336e-15
ISOLE-01		0	0	0	2.09143e-08	1.79615e-87
PROLI-01		0	0	0	1.86215e-08	1.0031e-16
TYROS-01		0	0	0	2.21037e-12	4.09275e-22
TRYPT-01		0	0	0	1.08586e-19	8.17251e-24
ARGIN-01		0	0	0	2.05634e-14	6.84486e-15
LYSIN-01		0	0	0	1.65318e-16	3.11616e-21
PHENY-01		0	0	0	8.011e-12	4.62017e-18
METHI-01		0	0	0	6.48191e-20	1.25819e-93
THREO-01		0	0	0	2.63963e-20	1.00271e-93
ASPAR-01		0	0	0	1.83255e-17	1.12142e-93
C4H6NO4-		0	0	0	4.01257e-12	3.44604e-91
C6H13N2O		0	0	0	5.98909e-08	1.30043e-14
TYROS-02		0	0	0	1.77467e-05	3.28601e-15
TYROS-03		0	0	0	2.44311e-13	4.5237e-23
TRYPT-02		0	0	0	2.01882e-14	8.21304e-24
ARGIN-02		0	0	0	2.84522e-06	9.47077e-07
ARGIN-03		0	0	0	2.17011e-16	1.34435e-16
PHENY-02		0	0	0	0.000157817	9.10176e-11
METHI-02		0	0	0	1.47499e-14	1.26674e-93
THREO-02		0	0	0	1.17752e-14	1.01127e-93
AMMON(S)		0	0	0	0	0
NH4HS(S)		0	0	0	0.000623556	5.35518e-83
SALT1		0	0	0	0	0
S--		0	0	0	0	0
NH2COO		0	0	0	0	0
H3PO4		0	0	0	0.0050514	6.0462e-17
H2PO4-		0	2.19287e-05	0.452627	0.025316	0
HPO4--		0	0	0	5.62632e-09	0
PO4---		0	0	0	1.45915e-20	0
DIAMM-01		0	0	0	0	0
SALT3		0	0	0	0	0
K+		0	4.69879e-06	0.096987	0.0114253	0
KH2PO4		0	0	0	1.82906e-17	1.15529e-93
K2HPO4		0	0	0	0	0
K2CO3		0	0	0	0	0
KHCO3		0	7.24012e-06	0.149442	0	0
K3PO4		0	0	0	0	0
MG(OH)2		0	8.61039e-06	0.177726	0	0
MG++		0	0	0	0.00583517	0
STRUVITE		0	0	0	0	0
FE+++		0	5.96961e-06	0.123218	0	0
FE(OH)2		0	0	0	0	0
FE++		0	0	0	0.0180886	0
FE(OH)3		0.013875	0.0102231	8.33333e-07	6.79649e-06	5.83691e-85
FES					0	0
FECO3		-2.31039e+08			0	0
CA(OH)2		-2.03224e+06			0	0
CA++		-764281			0.011387	0
CACO3		-6722.69			0	0
HCL		0.0411507			7.0539e-10	3.64082e-08
CL-		4.6783			0.091845	0
Volume Flow	l/hr	-0.0101447			0.01763	0.392293
Vapor Phase		113.687
Molar Enthalpy	J/kmol	1.58072e-07				-2.86689e+08
Mass Enthalpy	J/kg					-8.56976e+06
Molar Entropy	J/kmol-K	0.000431297				-17224.1
Mass Entropy	J/kg-K					-514.868
Molar Density	kmol/cum					0.0371548
Mass Density	kg/cum	-2.88077e+08	-2.83718e+08	-6.04276e+08		1.24296
Enthalpy Flow	Watt	-1.51851e+07	-1.5207e+07	-6.02956e+06		-1.16074
Average MW		-167180	-156671	1.03038e+06		33.4535
Mole Flows	kmol/hr	-8812.41	-8397.41	10281.3		1.45756e-05
Mole Fractions		52.5612	51.5819	5.70723
Mass Flows	kg/day	997.138	962.364	571.973		0.0117025
Mass Fractions		-42.2019	-41.5588	-0.000798321
Liquid Phase		18.971	18.657	100.219
Molar Enthalpy	J/kmol	0.000527383	0.000527326	4.75603e-09	-2.26448e+08
Mass Enthalpy	J/kg				-1.09269e+07
Molar Entropy	J/kmol-K	0.24012	0.23612	1.14395e-05	7.78608e+37
Mass Entropy	J/kg-K				3.75704e+36
Molar Density	kmol/cum				34.0327
Mass Density	kg/cum				705.293
Enthalpy Flow	Watt				-37.7411
Average MW					20.724
Mole Flows	kmol/hr				0.000599997
Mole Fractions
Mass Flows	kg/day				0.298424
Mass Fractions
